# Supplementary material for: cJUN dependent innate immunity controls microbiome through selective phagocytosis in Nematostella
Source: Research Square preprint supplement (doi:10.21203/rs.3.rs-7020203/v1), 2025-07-11
Supplement: Supplementary file 2 [file d986fd1664c9fa810a0e5c53.xlsx]

## Sheet: Overview
		associated with:
Table S1	Bacterial Isolates used in this study	Figure 2, 3 and 5
Table S2	Proteomics-All identified proteins from this study	Figure 3
Table S3	Proteomics-Identified Clusters	Figure 3
Table S4	Proteomics-Kegg Enrichment	Figure 3
Table S5	ADONIS and ANOSIM calculations from microbiome comparison of cJUN+/+ and cJUN-/- polyps

## Sheet: Table S1 Bacterial Isolates
Isolate	Host	GenBank accession number (if available)	Closest type strains (with Sequence ID)	Similarity (%)	ASV number according Domin et al 2023	Reference
NJ1	Nematostella vectensis	PQ455196	Vibrio sp. BJGMM-B31 (JQ716236.1)	0.9972	23	Domin et al 2023
NJ33	Nematostella vectensis		Vibrio diazotrophicus (CP151842.1)	0.9944	59	Domin et al 2023
NA11	Nematostella vectensis		Vibrio plantisponsor (AP024893.1)	0.9874	19	Domin et al 2023
Hal025	Halichondria panicea		Vibrio gigantis (AP025493.1)	0.9986
Hal281	Halichondria panicea	MT406665	Vibrio cyclitrophicus (MT406665.1)	0.9987		Marulanda-Gomez et al 2025

## Sheet: Table S2_Proteomics_All
Uniprot Accession	Uniprot Annotation
A7SPT6	(S)-3-amino-2-methylpropionate transaminase OS=Nematostella vectensis OX=45351 GN=v1g227385 PE=3 SV=1
A7S1S6	1,4-alpha-glucan branching enzyme OS=Nematostella vectensis OX=45351 GN=v1g165393 PE=3 SV=1
A7RHS8	10 kDa chaperonin OS=Nematostella vectensis OX=45351 GN=v1g178050 PE=3 SV=1
A7SGZ8	116 kDa U5 small nuclear ribonucleoprotein component OS=Nematostella vectensis OX=45351 GN=v1g189775 PE=3 SV=1
A7S3A7	15-oxoprostaglandin 13-reductase OS=Nematostella vectensis OX=45351 GN=v1g165928 PE=3 SV=1
A7RMT9	1-Cys peroxiredoxin OS=Nematostella vectensis OX=45351 GN=v1g234225 PE=3 SV=1
A7SUA4	26S proteasome non-ATPase regulatory subunit 1 OS=Nematostella vectensis OX=45351 GN=v1g193603 PE=3 SV=1
A7RF73	26S proteasome non-ATPase regulatory subunit 13 OS=Nematostella vectensis OX=45351 GN=v1g79078 PE=3 SV=1
A7SYY2	26S proteasome non-ATPase regulatory subunit 4 OS=Nematostella vectensis OX=45351 GN=v1g236108 PE=3 SV=1
A7SZN8	26S proteasome non-ATPase regulatory subunit 6 OS=Nematostella vectensis OX=45351 GN=v1g195005 PE=3 SV=1
A7SIL7	26S proteasome non-ATPase regulatory subunit 8 OS=Nematostella vectensis OX=45351 GN=v1g190193 PE=3 SV=1
A7SFJ3	26S proteasome regulatory subunit 7 OS=Nematostella vectensis OX=45351 GN=v1g189255 PE=3 SV=1
A7RQF7	26S proteasome regulatory subunit RPN11 OS=Nematostella vectensis OX=45351 GN=v1g239961 PE=4 SV=1
A7SPM0	2-amino-3-carboxymuconate-6-semialdehyde decarboxylase OS=Nematostella vectensis OX=45351 GN=v1g126268 PE=3 SV=1
A7STP8	2-hydroxyacyl-CoA lyase 2 (Fragment) OS=Nematostella vectensis OX=45351 GN=v1g131401 PE=3 SV=1
A7S9N4	2-hydroxyacyl-CoA lyase 2 OS=Nematostella vectensis OX=45351 GN=v1g168076 PE=4 SV=1
A7RZV6	2-oxoisovalerate dehydrogenase subunit alpha OS=Nematostella vectensis OX=45351 GN=v1g183894 PE=3 SV=1
A7S5Z0	2-phospho-D-glycerate hydro-lyase OS=Nematostella vectensis OX=45351 GN=v1g229475 PE=3 SV=1
A7RIT9	3-hydroxyanthranilate 3,4-dioxygenase OS=Nematostella vectensis OX=45351 GN=v1g178517 PE=3 SV=1
A7RHX8	3-hydroxyisobutyrate dehydrogenase OS=Nematostella vectensis OX=45351 GN=v1g178116 PE=3 SV=1
A7RHZ5	3-hydroxyisobutyryl-CoA hydrolase, mitochondrial OS=Nematostella vectensis OX=45351 GN=v1g158887 PE=4 SV=1
A7S0B5	3-methylcrotonyl-CoA carboxylase 2 (Fragment) OS=Nematostella vectensis OX=45351 GN=v1g204823 PE=3 SV=1
A7RL80	40S ribosomal protein S11 OS=Nematostella vectensis OX=45351 GN=v1g239074 PE=3 SV=1
A7SK96	40S ribosomal protein S12 OS=Nematostella vectensis OX=45351 GN=v1g171532 PE=3 SV=1
A7SQP1	40S ribosomal protein S13 OS=Nematostella vectensis OX=45351 GN=v1g235818 PE=3 SV=1
A7RS93	40S ribosomal protein S15 OS=Nematostella vectensis OX=45351 GN=v1g181408 PE=3 SV=1
A7SPQ4	40S ribosomal protein S17 OS=Nematostella vectensis OX=45351 GN=v1g192160 PE=3 SV=1
A7SH82	40S ribosomal protein S18 OS=Nematostella vectensis OX=45351 GN=v1g245261 PE=3 SV=1
A7RJJ7	40S ribosomal protein S2 OS=Nematostella vectensis OX=45351 GN=v1g178799 PE=3 SV=1
A7SES9	40S ribosomal protein S20 OS=Nematostella vectensis OX=45351 GN=v1g188999 PE=3 SV=1
A7S8Q0	40S ribosomal protein S21 OS=Nematostella vectensis OX=45351 GN=v1g109201 PE=3 SV=1
A7RFJ1	40S ribosomal protein S23 OS=Nematostella vectensis OX=45351 GN=v1g177191 PE=3 SV=1
A7SFM1	40S ribosomal protein S24 OS=Nematostella vectensis OX=45351 GN=v1g244934 PE=3 SV=1
A7SKY1	40S ribosomal protein S25 OS=Nematostella vectensis OX=45351 GN=v1g190935 PE=3 SV=1
A7RG86	40S ribosomal protein S26 OS=Nematostella vectensis OX=45351 GN=v1g177484 PE=3 SV=1
A7S494	40S ribosomal protein S27 OS=Nematostella vectensis OX=45351 GN=v1g234893 PE=3 SV=1
A7T856	40S ribosomal protein S28 (Fragment) OS=Nematostella vectensis OX=45351 GN=v1g149719 PE=3 SV=1
A7S249	40S ribosomal protein S29 OS=Nematostella vectensis OX=45351 GN=v1g229213 PE=3 SV=1
A7S3J7	40S ribosomal protein S3a OS=Nematostella vectensis OX=45351 GN=v1g242621 PE=3 SV=1
A7SRV8	40S ribosomal protein S4 OS=Nematostella vectensis OX=45351 GN=v1g173646 PE=3 SV=1
A7SGC3	40S ribosomal protein S6 OS=Nematostella vectensis OX=45351 GN=v1g245093 PE=3 SV=1
A7T0C1	40S ribosomal protein S8 OS=Nematostella vectensis OX=45351 GN=v1g195152 PE=3 SV=1
A7SS49	40S ribosomal protein S9 OS=Nematostella vectensis OX=45351 GN=v1g237468 PE=3 SV=1
A7RKS5	40S ribosomal protein SA OS=Nematostella vectensis OX=45351 GN=v1g198553 PE=3 SV=1
A7RIT0	4a-hydroxytetrahydrobiopterin dehydratase OS=Nematostella vectensis OX=45351 GN=v1g238606 PE=3 SV=1
A7RIM3	4-hydroxy-2-oxoglutarate aldolase, mitochondrial OS=Nematostella vectensis OX=45351 GN=v1g82674 PE=3 SV=1
A7STJ3	4-hydroxy-4-methyl-2-oxoglutarate aldolase OS=Nematostella vectensis OX=45351 GN=v1g131218 PE=3 SV=1
A7S7S9	5'-nucleotidase OS=Nematostella vectensis OX=45351 GN=v1g243427 PE=3 SV=1
A7SQ36	60S acidic ribosomal protein P0 OS=Nematostella vectensis OX=45351 GN=v1g237425 PE=3 SV=1
A7RLY2	60S acidic ribosomal protein P2 OS=Nematostella vectensis OX=45351 GN=v1g160310 PE=3 SV=1
A7REW3	60S ribosomal protein L12 OS=Nematostella vectensis OX=45351 GN=v1g176975 PE=3 SV=1
A7S405	60S ribosomal protein L13 OS=Nematostella vectensis OX=45351 GN=v1g242697 PE=3 SV=1
A7SBZ8	60S ribosomal protein L13a OS=Nematostella vectensis OX=45351 GN=v1g188032 PE=3 SV=1
A7SAM6	60S ribosomal protein L14 OS=Nematostella vectensis OX=45351 GN=v1g244001 PE=3 SV=1
A7RSF0	60S ribosomal protein L17 OS=Nematostella vectensis OX=45351 GN=v1g162224 PE=3 SV=1
A7RW50	60S ribosomal protein L18a OS=Nematostella vectensis OX=45351 GN=v1g163400 PE=3 SV=1
A7SBD1	60S ribosomal protein L21 OS=Nematostella vectensis OX=45351 GN=v1g237086 PE=3 SV=1
A7RUW3	60S ribosomal protein L23 (Fragment) OS=Nematostella vectensis OX=45351 GN=v1g94285 PE=3 SV=1
A7S072	60S ribosomal protein L27 OS=Nematostella vectensis OX=45351 GN=v1g234712 PE=3 SV=1
A7RLF6	60S ribosomal protein L27a (Fragment) OS=Nematostella vectensis OX=45351 GN=v1g85854 PE=3 SV=1
A7RYT2	60S ribosomal protein L28 OS=Nematostella vectensis OX=45351 GN=v1g236761 PE=3 SV=1
A7RQD8	60S ribosomal protein L30 OS=Nematostella vectensis OX=45351 GN=v1g180772 PE=3 SV=1
A7S786	60S ribosomal protein L31 OS=Nematostella vectensis OX=45351 GN=v1g235042 PE=3 SV=1
A7SCX9	60S ribosomal protein L34 OS=Nematostella vectensis OX=45351 GN=v1g237122 PE=3 SV=1
A7SQT2	60S ribosomal protein L35 OS=Nematostella vectensis OX=45351 GN=v1g246818 PE=3 SV=1
A7RR70	60S ribosomal protein L35a OS=Nematostella vectensis OX=45351 GN=v1g240098 PE=3 SV=1
A7SNU0	60S ribosomal protein L36 OS=Nematostella vectensis OX=45351 GN=v1g191823 PE=3 SV=1
A7RKV4	60S ribosomal protein L38 OS=Nematostella vectensis OX=45351 GN=v1g226298 PE=3 SV=1
A7S4S4	60S ribosomal protein L6 OS=Nematostella vectensis OX=45351 GN=v1g236919 PE=3 SV=1
A7RN14	60S ribosomal protein L7a OS=Nematostella vectensis OX=45351 GN=v1g236492 PE=3 SV=1
A7S5T9	60S ribosomal protein L8 OS=Nematostella vectensis OX=45351 GN=v1g234970 PE=4 SV=1
A7S3C2	60S ribosomal protein L9 OS=Nematostella vectensis OX=45351 GN=v1g242566 PE=3 SV=1
A7SLT6	6-phosphogluconate dehydrogenase, decarboxylating OS=Nematostella vectensis OX=45351 GN=v1g230495 PE=3 SV=1
A7RMK1	6-phosphogluconolactonase OS=Nematostella vectensis OX=45351 GN=v1g160554 PE=3 SV=1
A7S6P2	Acetyl-CoA C-myristoyltransferase OS=Nematostella vectensis OX=45351 GN=v1g207642 PE=3 SV=1
A7SYK6	Acetyl-CoA deacylase OS=Nematostella vectensis OX=45351 GN=v1g237598 PE=3 SV=1
A7SAZ3	Acetyl-coenzyme A synthetase OS=Nematostella vectensis OX=45351 GN=v1g187737 PE=3 SV=1
A7SQK2	Acetyltransferase component of pyruvate dehydrogenase complex OS=Nematostella vectensis OX=45351 GN=v1g227398 PE=3 SV=1
A7S7W1	Actin-related protein 2 OS=Nematostella vectensis OX=45351 GN=v1g186733 PE=3 SV=1
A7SA67	Actin-related protein 2/3 complex subunit 3 OS=Nematostella vectensis OX=45351 GN=v1g235176 PE=3 SV=1
A7RRG4	Actin-related protein 2/3 complex subunit 4 OS=Nematostella vectensis OX=45351 GN=v1g236559 PE=3 SV=1
A7RWB9	Actin-related protein 2/3 complex subunit 5 OS=Nematostella vectensis OX=45351 GN=v1g182709 PE=3 SV=1
A7SZA7	Actin-related protein 2/3 complex subunit OS=Nematostella vectensis OX=45351 GN=v1g236117 PE=3 SV=1
A7RJH5	Acyl carrier protein OS=Nematostella vectensis OX=45351 GN=v1g236403 PE=3 SV=1
A7S6Q1	Acylaminoacyl-peptidase OS=Nematostella vectensis OX=45351 GN=v1g167135 PE=3 SV=1
A7SI32	Acyl-coenzyme A oxidase OS=Nematostella vectensis OX=45351 GN=v1g170851 PE=3 SV=1
A7RLE0	Acyl-coenzyme A oxidase OS=Nematostella vectensis OX=45351 GN=v1g86003 PE=3 SV=1
A7STC7	Adenine phosphoribosyltransferase OS=Nematostella vectensis OX=45351 GN=v1g193324 PE=3 SV=1
A7RXR7	Adenosine kinase OS=Nematostella vectensis OX=45351 GN=v1g163941 PE=3 SV=1
A7SRK8	Adenosylhomocysteinase OS=Nematostella vectensis OX=45351 GN=v1g192745 PE=3 SV=1
A7RME1	Adenosylhomocysteinase OS=Nematostella vectensis OX=45351 GN=v1g234207 PE=3 SV=1
A7T0G9	Adenylate kinase OS=Nematostella vectensis OX=45351 GN=v1g140375 PE=3 SV=1
A7RQH5	Adenylyl cyclase-associated protein OS=Nematostella vectensis OX=45351 GN=v1g161560 PE=3 SV=1
A7RN38	ADP/ATP translocase OS=Nematostella vectensis OX=45351 GN=v1g239511 PE=3 SV=1
A7S616	ADP-ribosylation factor 6 OS=Nematostella vectensis OX=45351 GN=v1g236955 PE=3 SV=1
A7T7B4	AICAR transformylase/inosine monophosphate cyclohydrolase (Fragment) OS=Nematostella vectensis OX=45351 GN=v1g60966 PE=3 SV=1
A7SFU6	AICAR transformylase/inosine monophosphate cyclohydrolase OS=Nematostella vectensis OX=45351 GN=v1g170139 PE=3 SV=1
A7SLG7	Alanine transaminase OS=Nematostella vectensis OX=45351 GN=v1g235651 PE=3 SV=1
A7T0S1	Alanine transaminase OS=Nematostella vectensis OX=45351 GN=v1g236165 PE=3 SV=1
A7SBV0	Alanine--glyoxylate aminotransferase OS=Nematostella vectensis OX=45351 GN=v1g112567 PE=3 SV=1
A7SHM7	Alanine--glyoxylate aminotransferase OS=Nematostella vectensis OX=45351 GN=v1g170730 PE=3 SV=1
A7SHU9	Alanine--tRNA ligase OS=Nematostella vectensis OX=45351 GN=v1g189992 PE=3 SV=1
A7SXC6	Aldehyde dehydrogenase (NAD(+)) OS=Nematostella vectensis OX=45351 GN=v1g175287 PE=3 SV=1
A7SDT3	Aldose 1-epimerase OS=Nematostella vectensis OX=45351 GN=v1g229971 PE=3 SV=1
A7RSL3	Alkaline phosphatase OS=Nematostella vectensis OX=45351 GN=v1g162264 PE=3 SV=1
A7SUH3	Allantoate amidinohydrolase OS=Nematostella vectensis OX=45351 GN=v1g235970 PE=3 SV=1
A7T8B9	Alpha-1,4 glucan phosphorylase (Fragment) OS=Nematostella vectensis OX=45351 GN=v1g149999 PE=3 SV=1
A7SR65	Alpha-1,4 glucan phosphorylase OS=Nematostella vectensis OX=45351 GN=v1g246875 PE=3 SV=1
A7T0R0	Alpha-galactosidase (Fragment) OS=Nematostella vectensis OX=45351 GN=v1g220553 PE=3 SV=1
A7SFR2	Alpha-galactosidase OS=Nematostella vectensis OX=45351 GN=v1g170108 PE=3 SV=1
A7SJT4	Alpha-L-fucosidase OS=Nematostella vectensis OX=45351 GN=v1g120822 PE=3 SV=1
A7RGT0	Alpha-L-fucosidase OS=Nematostella vectensis OX=45351 GN=v1g158453 PE=3 SV=1
A7RLD1	Alpha-L-fucosidase OS=Nematostella vectensis OX=45351 GN=v1g198796 PE=3 SV=1
A7SSJ0	Alpha-mannosidase OS=Nematostella vectensis OX=45351 GN=v1g173865 PE=3 SV=1
A7SFA1	Alpha-mannosidase OS=Nematostella vectensis OX=45351 GN=v1g244860 PE=3 SV=1
A7S6X6	Amine oxidase OS=Nematostella vectensis OX=45351 GN=v1g229539 PE=3 SV=1
A7SR90	Aminoacyl-tRNA hydrolase OS=Nematostella vectensis OX=45351 GN=v1g192648 PE=4 SV=1
A7SY95	Aminomethyltransferase (Fragment) OS=Nematostella vectensis OX=45351 GN=v1g137645 PE=3 SV=1
A7S394	Aminopeptidase (Fragment) OS=Nematostella vectensis OX=45351 GN=v1g102784 PE=3 SV=1
A7RL33	Aminopeptidase OS=Nematostella vectensis OX=45351 GN=v1g179195 PE=3 SV=1
A7RUV9	Aminopeptidase OS=Nematostella vectensis OX=45351 GN=v1g240852 PE=3 SV=1
A7S710	Anamorsin homolog OS=Nematostella vectensis OX=45351 GN=v1g167244 PE=3 SV=1
A7SQE7	Angiotensin-converting enzyme (Fragment) OS=Nematostella vectensis OX=45351 GN=v1g11121 PE=3 SV=1
A7SKY7	Angiotensin-converting enzyme OS=Nematostella vectensis OX=45351 GN=v1g190941 PE=3 SV=1
A7SEG1	Angiotensin-converting enzyme OS=Nematostella vectensis OX=45351 GN=v1g210990 PE=3 SV=1
A7SW86	Annexin OS=Nematostella vectensis OX=45351 GN=v1g134949 PE=3 SV=1
A7T6G0	Annexin OS=Nematostella vectensis OX=45351 GN=v1g195888 PE=3 SV=1
A7STD6	Anoctamin (Fragment) OS=Nematostella vectensis OX=45351 GN=v1g10892 PE=3 SV=1
A7RKU9	Anoctamin (Fragment) OS=Nematostella vectensis OX=45351 GN=v1g30680 PE=3 SV=1
A7REV0	Anoctamin (Fragment) OS=Nematostella vectensis OX=45351 GN=v1g79192 PE=3 SV=1
A7RKU7	Anoctamin OS=Nematostella vectensis OX=45351 GN=v1g159852 PE=3 SV=1
A7SBX8	Anoctamin OS=Nematostella vectensis OX=45351 GN=v1g244207 PE=3 SV=1
A7SJK8	AP complex subunit beta OS=Nematostella vectensis OX=45351 GN=v1g190491 PE=3 SV=1
A7RH33	AP-2 complex subunit alpha OS=Nematostella vectensis OX=45351 GN=v1g236331 PE=3 SV=1
A7SDJ0	AP-3 complex subunit delta (Fragment) OS=Nematostella vectensis OX=45351 GN=v1g114271 PE=3 SV=1
A7RQC0	Arachidonate--CoA ligase OS=Nematostella vectensis OX=45351 GN=v1g239941 PE=4 SV=1
A7RZV8	Arginase OS=Nematostella vectensis OX=45351 GN=v1g241846 PE=3 SV=1
A7RER2	Arginine kinase 1 OS=Nematostella vectensis OX=45351 GN=v1g79604 PE=2 SV=1
A7SSL8	Argininosuccinate synthase (Fragment) OS=Nematostella vectensis OX=45351 GN=v1g173898 PE=3 SV=1
A7S644	Arginyl-tRNA synthetase OS=Nematostella vectensis OX=45351 GN=v1g229489 PE=3 SV=1
A7RY65	Arp2/3 complex 34 kDa subunit OS=Nematostella vectensis OX=45351 GN=v1g241492 PE=3 SV=1
A7RQB5	Ars2/serrate-like protein OS=Nematostella vectensis OX=45351 GN=v1g239938 PE=2 SV=1
A7RXD3	Asparagine synthetase [glutamine-hydrolyzing] OS=Nematostella vectensis OX=45351 GN=v1g163815 PE=4 SV=1
A7SPW2	Aspartate aminotransferase OS=Nematostella vectensis OX=45351 GN=v1g246662 PE=3 SV=1
A7RMR5	Aspartate aminotransferase OS=Nematostella vectensis OX=45351 GN=v1g86861 PE=3 SV=1
A7S265	Aspartate--tRNA ligase, cytoplasmic OS=Nematostella vectensis OX=45351 GN=v1g205625 PE=3 SV=1
A7RHL4	Aspartyl aminopeptidase OS=Nematostella vectensis OX=45351 GN=v1g238321 PE=3 SV=1
A7RXX3	ATP synthase subunit b OS=Nematostella vectensis OX=45351 GN=v1g203782 PE=3 SV=1
A7SPP0	ATP synthase subunit beta OS=Nematostella vectensis OX=45351 GN=v1g230667 PE=3 SV=1
A7SNG9	ATP synthase subunit d, mitochondrial OS=Nematostella vectensis OX=45351 GN=v1g191692 PE=3 SV=1
A7RNI6	ATP synthase subunit gamma OS=Nematostella vectensis OX=45351 GN=v1g239595 PE=3 SV=1
A7RV43	ATP synthase subunit O, mitochondrial OS=Nematostella vectensis OX=45351 GN=v1g94346 PE=3 SV=1
A7SY16	ATP synthase-coupling factor 6, mitochondrial OS=Nematostella vectensis OX=45351 GN=v1g248032 PE=3 SV=1
A7SFA3	ATP-citrate synthase OS=Nematostella vectensis OX=45351 GN=v1g211386 PE=3 SV=1
A7RRZ8	ATP-dependent (S)-NAD(P)H-hydrate dehydratase OS=Nematostella vectensis OX=45351 GN=v1g162096 PE=3 SV=1
A7SRG8	ATP-dependent Clp protease proteolytic subunit OS=Nematostella vectensis OX=45351 GN=v1g192713 PE=3 SV=1
A7RH48	ATP-dependent DNA helicase 2 subunit 1 OS=Nematostella vectensis OX=45351 GN=v1g238226 PE=3 SV=1
A7RMK9	ATP-dependent RNA helicase DDX1 OS=Nematostella vectensis OX=45351 GN=v1g199320 PE=3 SV=1
A7SPR6	Autophagy-related protein 27 OS=Nematostella vectensis OX=45351 GN=v1g246640 PE=3 SV=1
A7S9V7	Bardet-Biedl syndrome 2 protein homolog OS=Nematostella vectensis OX=45351 GN=v1g235159 PE=4 SV=1
A7RS40	Battenin OS=Nematostella vectensis OX=45351 GN=v1g240316 PE=3 SV=1
A7RQV8	Beta-galactosidase OS=Nematostella vectensis OX=45351 GN=v1g161675 PE=3 SV=1
A7S8R3	Beta-galactosidase OS=Nematostella vectensis OX=45351 GN=v1g167821 PE=3 SV=1
A7RET7	Beta-hexosaminidase OS=Nematostella vectensis OX=45351 GN=v1g237718 PE=3 SV=1
A7T3N0	Beta-hexosaminidase OS=Nematostella vectensis OX=45351 GN=v1g248668 PE=3 SV=1
A7RQ54	Beta-N-acetylhexosaminidase OS=Nematostella vectensis OX=45351 GN=v1g200451 PE=3 SV=1
A7RSQ4	Beta-N-acetylhexosaminidase OS=Nematostella vectensis OX=45351 GN=v1g201552 PE=3 SV=1
A7SR78	Beta-N-acetylhexosaminidase OS=Nematostella vectensis OX=45351 GN=v1g216174 PE=3 SV=1
A7SK38	Beta-N-acetylhexosaminidase OS=Nematostella vectensis OX=45351 GN=v1g245803 PE=3 SV=1
A7SRW5	Bifunctional lysine-specific demethylase and histidyl-hydroxylase OS=Nematostella vectensis OX=45351 GN=v1g230798 PE=3 SV=1
A7RM23	Bleomycin hydrolase OS=Nematostella vectensis OX=45351 GN=v1g86594 PE=3 SV=1
A7SLW1	Branched-chain-amino-acid aminotransferase OS=Nematostella vectensis OX=45351 GN=v1g246094 PE=3 SV=1
A7RSV9	Branchpoint-bridging protein (Fragment) OS=Nematostella vectensis OX=45351 GN=v1g162319 PE=3 SV=1
A7SWC2	Butyryl-CoA dehydrogenase OS=Nematostella vectensis OX=45351 GN=v1g194219 PE=3 SV=1
A7RG51	C-1-tetrahydrofolate synthase, cytoplasmic OS=Nematostella vectensis OX=45351 GN=v1g158170 PE=3 SV=1
A7RNJ1	CAAT box DNA-binding protein subunit B (Fragment) OS=Nematostella vectensis OX=45351 GN=v1g88215 PE=3 SV=1
A7SF31	CAD protein OS=Nematostella vectensis OX=45351 GN=v1g189113 PE=3 SV=1
A7RN03	Calcium load-activated calcium channel OS=Nematostella vectensis OX=45351 GN=v1g179997 PE=3 SV=1
A7SWC7	Calcium uniporter protein OS=Nematostella vectensis OX=45351 GN=v1g227549 PE=3 SV=1
A7RF52	Calcium/calmodulin-dependent protein kinase OS=Nematostella vectensis OX=45351 GN=v1g157808 PE=1 SV=1
A7T0H5	Calcium/calmodulin-dependent protein kinase OS=Nematostella vectensis OX=45351 GN=v1g220432 PE=1 SV=1
A7RM93	Calcium-transporting ATPase OS=Nematostella vectensis OX=45351 GN=v1g160437 PE=3 SV=1
A7S3H9	Calcium-transporting ATPase OS=Nematostella vectensis OX=45351 GN=v1g166010 PE=3 SV=1
A7S627	Calcyclin-binding protein OS=Nematostella vectensis OX=45351 GN=v1g166897 PE=4 SV=1
A7RPI8	Calmodulin OS=Nematostella vectensis OX=45351 GN=v1g239788 PE=3 SV=1
A7S2D8	Carbonic anhydrase (Fragment) OS=Nematostella vectensis OX=45351 GN=v1g101864 PE=3 SV=1
A7S762	Carbonic anhydrase (Fragment) OS=Nematostella vectensis OX=45351 GN=v1g107048 PE=3 SV=1
A7S717	Carbonic anhydrase OS=Nematostella vectensis OX=45351 GN=v1g186479 PE=3 SV=1
A7RGK5	Carbonyl reductase (NADPH) OS=Nematostella vectensis OX=45351 GN=v1g238099 PE=3 SV=1
A7RN07	Carboxylic ester hydrolase (Fragment) OS=Nematostella vectensis OX=45351 GN=v1g31599 PE=3 SV=1
A7RN08	Carboxylic ester hydrolase OS=Nematostella vectensis OX=45351 GN=v1g160761 PE=3 SV=1
A7SLM2	Carboxylic ester hydrolase OS=Nematostella vectensis OX=45351 GN=v1g191125 PE=3 SV=1
A7S6G6	Carboxypeptidase Q OS=Nematostella vectensis OX=45351 GN=v1g186283 PE=4 SV=1
A7SG27	Casein kinase II subunit beta OS=Nematostella vectensis OX=45351 GN=v1g245041 PE=3 SV=1
A7SGN5	Cathepsin X (Fragment) OS=Nematostella vectensis OX=45351 GN=v1g117697 PE=3 SV=1
A7S7Z5	CB1 cannabinoid receptor-interacting protein 1 OS=Nematostella vectensis OX=45351 GN=v1g167561 PE=3 SV=1
A7S924	CCT-alpha (Fragment) OS=Nematostella vectensis OX=45351 GN=v1g109595 PE=3 SV=1
A7SMT4	CCT-beta (Fragment) OS=Nematostella vectensis OX=45351 GN=v1g124119 PE=3 SV=1
A7SMT1	CCT-beta OS=Nematostella vectensis OX=45351 GN=v1g191440 PE=3 SV=1
A7T9B6	CCT-epsilon (Fragment) OS=Nematostella vectensis OX=45351 GN=v1g151104 PE=3 SV=1
A7RGP0	CCT-epsilon OS=Nematostella vectensis OX=45351 GN=v1g233945 PE=3 SV=1
A7SBU6	CCT-theta OS=Nematostella vectensis OX=45351 GN=v1g244189 PE=3 SV=1
A7SFJ1	Cell division control protein 42 homolog OS=Nematostella vectensis OX=45351 GN=v1g189251 PE=3 SV=1
A7SD85	Cell division cycle 5-related protein OS=Nematostella vectensis OX=45351 GN=cdc5l PE=3 SV=1
A7SCZ7	cGMP-dependent protein kinase OS=Nematostella vectensis OX=45351 GN=v1g244400 PE=3 SV=1
A7RWE1	Choline transporter-like protein OS=Nematostella vectensis OX=45351 GN=v1g241158 PE=3 SV=1
A7SHQ3	Cilia- and flagella-associated protein 36 OS=Nematostella vectensis OX=45351 GN=v1g212454 PE=3 SV=1
A7RKR4	Citrate hydro-lyase OS=Nematostella vectensis OX=45351 GN=v1g179073 PE=3 SV=1
A7RU37	Citrate hydro-lyase OS=Nematostella vectensis OX=45351 GN=v1g93721 PE=3 SV=1
A7RI62	Citrate synthase (Fragment) OS=Nematostella vectensis OX=45351 GN=v1g82156 PE=3 SV=1
A7RVC0	Clathrin heavy chain OS=Nematostella vectensis OX=45351 GN=v1g163153 PE=3 SV=1
A7SZR4	Clathrin light chain OS=Nematostella vectensis OX=45351 GN=v1g175828 PE=3 SV=1
A7SVS3	Cleavage stimulation factor 50 kDa subunit OS=Nematostella vectensis OX=45351 GN=v1g174858 PE=4 SV=1
A7S9A4	Coatomer subunit alpha OS=Nematostella vectensis OX=45351 GN=v1g187173 PE=4 SV=1
A7SMS0	Coatomer subunit beta OS=Nematostella vectensis OX=45351 GN=v1g124098 PE=4 SV=1
A7RL77	Coatomer subunit beta' OS=Nematostella vectensis OX=45351 GN=v1g239070 PE=3 SV=1
A7SRJ1	Coatomer subunit delta OS=Nematostella vectensis OX=45351 GN=v1g192736 PE=3 SV=1
A7T498	Coatomer subunit delta OS=Nematostella vectensis OX=45351 GN=v1g222121 PE=3 SV=1
A7SPR7	Coatomer subunit epsilon OS=Nematostella vectensis OX=45351 GN=v1g227384 PE=3 SV=1
A7S6Q5	Coatomer subunit gamma OS=Nematostella vectensis OX=45351 GN=v1g186367 PE=3 SV=1
A7RNG8	Coiled-coil domain-containing protein 22 homolog OS=Nematostella vectensis OX=45351 GN=v1g180167 PE=3 SV=1
A7RYA4	Coiled-coil domain-containing protein 47 OS=Nematostella vectensis OX=45351 GN=v1g203929 PE=4 SV=1
A7SBS3	Coiled-coil domain-containing protein 58 OS=Nematostella vectensis OX=45351 GN=v1g244177 PE=3 SV=1
A7S2C3	Complex I-15 kDa OS=Nematostella vectensis OX=45351 GN=v1g232602 PE=3 SV=1
A7SPN0	Complex I-19kD (Fragment) OS=Nematostella vectensis OX=45351 GN=v1g17799 PE=3 SV=1
A7SAD2	Complex I-49kD OS=Nematostella vectensis OX=45351 GN=v1g110807 PE=3 SV=1
A7S298	Complex I-B12 OS=Nematostella vectensis OX=45351 GN=v1g165533 PE=3 SV=1
A7SUW1	Complex I-B14 OS=Nematostella vectensis OX=45351 GN=v1g193830 PE=3 SV=1
A7SB58	Complex I-B14.5a OS=Nematostella vectensis OX=45351 GN=v1g244078 PE=3 SV=1
A7SI61	Complex I-B22 OS=Nematostella vectensis OX=45351 GN=v1g119247 PE=3 SV=1
A7S636	Complex III subunit 8 OS=Nematostella vectensis OX=45351 GN=v1g236959 PE=3 SV=1
A7RLS7	COP9 signalosome complex subunit 2 OS=Nematostella vectensis OX=45351 GN=v1g160233 PE=3 SV=1
A7SLN0	COP9 signalosome complex subunit 6 OS=Nematostella vectensis OX=45351 GN=v1g122914 PE=3 SV=1
A7S4S5	Coproporphyrinogen oxidase OS=Nematostella vectensis OX=45351 GN=v1g229388 PE=3 SV=1
A7RFP3	Coronin OS=Nematostella vectensis OX=45351 GN=v1g157985 PE=3 SV=1
A7S473	Coronin OS=Nematostella vectensis OX=45351 GN=v1g206544 PE=3 SV=1
A7RHL5	Costars family protein v1g158749 OS=Nematostella vectensis OX=45351 GN=v1g158749 PE=3 SV=1
A7RQG2	COX assembly mitochondrial protein (Fragment) OS=Nematostella vectensis OX=45351 GN=v1g67120 PE=3 SV=1
A7SY83	CTP:phosphoethanolamine cytidylyltransferase OS=Nematostella vectensis OX=45351 GN=v1g175500 PE=3 SV=1
A7RYI9	Cystathionine beta-synthase OS=Nematostella vectensis OX=45351 GN=v1g204029 PE=3 SV=1
A7RID2	Cysteinyl-tRNA synthetase OS=Nematostella vectensis OX=45351 GN=v1g159064 PE=3 SV=1
A7SGK8	Cytochrome b-c1 complex subunit 7 OS=Nematostella vectensis OX=45351 GN=v1g170417 PE=3 SV=1
A7SI73	Cytochrome b-c1 complex subunit Rieske, mitochondrial OS=Nematostella vectensis OX=45351 GN=v1g212662 PE=3 SV=1
A7SX99	Cytochrome c oxidase polypeptide Va OS=Nematostella vectensis OX=45351 GN=v1g175253 PE=3 SV=1
A7RJL7	Cytochrome c oxidase subunit OS=Nematostella vectensis OX=45351 GN=v1g236414 PE=3 SV=1
A7SFV8	D-3-phosphoglycerate dehydrogenase (Fragment) OS=Nematostella vectensis OX=45351 GN=v1g170150 PE=3 SV=1
A7T2Z4	Decapping nuclease (Fragment) OS=Nematostella vectensis OX=45351 GN=v1g143699 PE=3 SV=1
A7T2Z5	Decapping nuclease OS=Nematostella vectensis OX=45351 GN=v1g221590 PE=3 SV=1
A7SKC3	Delta-aminolevulinic acid dehydratase OS=Nematostella vectensis OX=45351 GN=v1g171543 PE=3 SV=1
A7S8F4	Deoxyhypusine hydroxylase OS=Nematostella vectensis OX=45351 GN=v1g167688 PE=3 SV=1
A7SLH5	Deoxynucleoside triphosphate triphosphohydrolase SAMHD1 OS=Nematostella vectensis OX=45351 GN=v1g246030 PE=3 SV=1
A7RPL3	Deoxyuridine 5'-triphosphate nucleotidohydrolase OS=Nematostella vectensis OX=45351 GN=v1g239804 PE=3 SV=1
A7RRU7	Diadenosine tetraphosphate synthetase OS=Nematostella vectensis OX=45351 GN=v1g162025 PE=3 SV=1
A7RQN7	Dihydrolipoamide acetyltransferase component of pyruvate dehydrogenase complex (Fragment) OS=Nematostella vectensis OX=45351 GN=v1g90374 PE=3 SV=1
A7SJI4	Dihydrolipoamide acetyltransferase component of pyruvate dehydrogenase complex OS=Nematostella vectensis OX=45351 GN=v1g190464 PE=3 SV=1
A7RFT6	Dihydrolipoyl dehydrogenase OS=Nematostella vectensis OX=45351 GN=v1g177276 PE=3 SV=1
A7SJG5	Dihydropyrimidine dehydrogenase [NADP(+)] OS=Nematostella vectensis OX=45351 GN=v1g190441 PE=3 SV=1
A7SJZ8	Dipeptidase (Fragment) OS=Nematostella vectensis OX=45351 GN=v1g121040 PE=3 SV=1
A7SK00	Dipeptidase OS=Nematostella vectensis OX=45351 GN=v1g171453 PE=3 SV=1
A7RZW4	Dipeptidyl peptidase 3 OS=Nematostella vectensis OX=45351 GN=dpp3 PE=3 SV=1
A7S0J1	DNA damage-binding protein 1 OS=Nematostella vectensis OX=45351 GN=v1g241997 PE=3 SV=1
A7SIT9	DNA polymerase epsilon catalytic subunit (Fragment) OS=Nematostella vectensis OX=45351 GN=v1g119951 PE=3 SV=1
A7SMI2	DNA replication licensing factor MCM2 OS=Nematostella vectensis OX=45351 GN=v1g191344 PE=3 SV=1
A7SPE9	DNA replication licensing factor MCM3 OS=Nematostella vectensis OX=45351 GN=v1g215383 PE=3 SV=1
A7RIT1	DNA replication licensing factor MCM5 OS=Nematostella vectensis OX=45351 GN=v1g238608 PE=3 SV=1
A7SQR1	DNA replication licensing factor MCM6 OS=Nematostella vectensis OX=45351 GN=v1g192492 PE=3 SV=1
A7SEF9	DNA replication licensing factor MCM7 OS=Nematostella vectensis OX=45351 GN=MCM7 PE=3 SV=1
A8DW37	DNA-directed RNA polymerase (Fragment) OS=Nematostella vectensis OX=45351 GN=v1g225894 PE=4 SV=1
A7T993	DNA-directed RNA polymerase subunit (Fragment) OS=Nematostella vectensis OX=45351 GN=v1g70504 PE=3 SV=1
A7SHD8	DNA-directed RNA polymerase subunit beta OS=Nematostella vectensis OX=45351 GN=v1g189883 PE=3 SV=1
A7S8F9	DNA-directed RNA polymerase subunit OS=Nematostella vectensis OX=45351 GN=v1g229643 PE=3 SV=1
A7SL38	DNA-directed RNA polymerases I and III subunit RPAC1 OS=Nematostella vectensis OX=45351 GN=v1g122262 PE=3 SV=1
A7RXH6	DnaJ homolog subfamily C member 22 OS=Nematostella vectensis OX=45351 GN=v1g234616 PE=4 SV=1
A7SAL0	Dolichol-phosphate mannosyltransferase subunit 1 OS=Nematostella vectensis OX=45351 GN=v1g168415 PE=3 SV=1
A7S5W3	Dolichyl-diphosphooligosaccharide--protein glycosyltransferase 48 kDa subunit OS=Nematostella vectensis OX=45351 GN=v1g186036 PE=3 SV=1
A7RVR9	Dolichyl-diphosphooligosaccharide--protein glycosyltransferase subunit 1 OS=Nematostella vectensis OX=45351 GN=v1g241029 PE=3 SV=1
A7SI16	Dolichyl-diphosphooligosaccharide--protein glycosyltransferase subunit 2 OS=Nematostella vectensis OX=45351 GN=v1g245416 PE=3 SV=1
A7RQD2	Dolichyl-diphosphooligosaccharide--protein glycotransferase OS=Nematostella vectensis OX=45351 GN=v1g180767 PE=3 SV=1
A7RHR8	Dolichyl-diphosphooligosaccharide--protein glycotransferase OS=Nematostella vectensis OX=45351 GN=v1g238356 PE=3 SV=1
A7RNC0	Dolichyl-phosphate beta-glucosyltransferase OS=Nematostella vectensis OX=45351 GN=v1g234255 PE=3 SV=1
A7S8M7	dTMP kinase OS=Nematostella vectensis OX=45351 GN=v1g243597 PE=3 SV=1
A7RGS4	Dynactin subunit 1 (Fragment) OS=Nematostella vectensis OX=45351 GN=v1g81224 PE=3 SV=1
A7SN34	Dynamin-1-like protein OS=Nematostella vectensis OX=45351 GN=v1g191557 PE=3 SV=1
A7RVI5	Dynein light chain OS=Nematostella vectensis OX=45351 GN=v1g236679 PE=3 SV=1
A7SMZ7	Dynein light chain roadblock OS=Nematostella vectensis OX=45351 GN=v1g237378 PE=3 SV=1
A7RRH9	Dynein light intermediate chain (Fragment) OS=Nematostella vectensis OX=45351 GN=v1g40628 PE=3 SV=1
A7S9Q6	E2 ubiquitin-conjugating enzyme OS=Nematostella vectensis OX=45351 GN=v1g235155 PE=3 SV=1
A7RR94	Electron transfer flavoprotein subunit alpha OS=Nematostella vectensis OX=45351 GN=v1g181047 PE=3 SV=1
A7SRQ1	Electron transfer flavoprotein subunit beta OS=Nematostella vectensis OX=45351 GN=v1g192806 PE=3 SV=1
A7RNA5	Electron transfer flavoprotein-ubiquinone oxidoreductase OS=Nematostella vectensis OX=45351 GN=v1g228390 PE=4 SV=1
A7SSW8	Elongation factor 1-alpha OS=Nematostella vectensis OX=45351 GN=v1g247215 PE=3 SV=1
A7SPW6	Elongation factor Ts, mitochondrial OS=Nematostella vectensis OX=45351 GN=v1g215604 PE=3 SV=1
A7S8T2	Elongation factor Tu OS=Nematostella vectensis OX=45351 GN=v1g229673 PE=3 SV=1
A7RJE2	Endoglucanase (Fragment) OS=Nematostella vectensis OX=45351 GN=v1g83869 PE=3 SV=1
A7RZR0	Enhancer of rudimentary homolog OS=Nematostella vectensis OX=45351 GN=v1g183841 PE=3 SV=1
A7RNR6	ER membrane protein complex subunit 1 OS=Nematostella vectensis OX=45351 GN=v1g234273 PE=3 SV=1
A7S428	Eukaryotic peptide chain release factor subunit 1 OS=Nematostella vectensis OX=45351 GN=v1g185421 PE=3 SV=1
A7S534	Eukaryotic translation initiation factor 2 subunit 1 OS=Nematostella vectensis OX=45351 GN=v1g185797 PE=3 SV=1
A7S8G4	Eukaryotic translation initiation factor 2A OS=Nematostella vectensis OX=45351 GN=v1g243561 PE=3 SV=1
A7SK48	Eukaryotic translation initiation factor 3 subunit A OS=Nematostella vectensis OX=45351 GN=v1g190699 PE=3 SV=2
A7SMR1	Eukaryotic translation initiation factor 3 subunit D OS=Nematostella vectensis OX=45351 GN=v1g235689 PE=3 SV=1
A7RWP6	Eukaryotic translation initiation factor 3 subunit E OS=Nematostella vectensis OX=45351 GN=v1g163572 PE=3 SV=1
A7SIV6	Eukaryotic translation initiation factor 3 subunit F OS=Nematostella vectensis OX=45351 GN=v1g230299 PE=3 SV=1
A7SKE9	Eukaryotic translation initiation factor 3 subunit G OS=Nematostella vectensis OX=45351 GN=v1g171563 PE=3 SV=1
A7SA47	Eukaryotic translation initiation factor 3 subunit H OS=Nematostella vectensis OX=45351 GN=v1g168210 PE=3 SV=1
A7RM20	Eukaryotic translation initiation factor 3 subunit I OS=Nematostella vectensis OX=45351 GN=v1g239264 PE=3 SV=1
A7RSH7	Eukaryotic translation initiation factor 3 subunit J OS=Nematostella vectensis OX=45351 GN=v1g240395 PE=3 SV=1
A7SGZ5	Eukaryotic translation initiation factor 3 subunit K OS=Nematostella vectensis OX=45351 GN=v1g170558 PE=3 SV=1
A7SDW5	Eukaryotic translation initiation factor 3 subunit L OS=Nematostella vectensis OX=45351 GN=v1g169424 PE=3 SV=1
A7SPX9	Eukaryotic translation initiation factor 3 subunit M OS=Nematostella vectensis OX=45351 GN=v1g192238 PE=3 SV=1
A7SX41	Eukaryotic translation initiation factor 4C (Fragment) OS=Nematostella vectensis OX=45351 GN=v1g17260 PE=3 SV=1
A7RZU8	Eukaryotic translation initiation factor 5 OS=Nematostella vectensis OX=45351 GN=v1g99103 PE=3 SV=1
A7T0N1	Eukaryotic translation initiation factor 5A OS=Nematostella vectensis OX=45351 GN=v1g176002 PE=3 SV=1
A7RHF7	Eukaryotic translation initiation factor 6 OS=Nematostella vectensis OX=45351 GN=EIF6 PE=3 SV=1
A7S4K7	Exportin-2 OS=Nematostella vectensis OX=45351 GN=v1g185581 PE=3 SV=1
A7SAG6	FACT complex subunit SSRP1 (Fragment) OS=Nematostella vectensis OX=45351 GN=v1g110962 PE=3 SV=1
A7S181	F-actin-capping protein subunit alpha OS=Nematostella vectensis OX=45351 GN=v1g242138 PE=3 SV=1
A7RU18	F-actin-capping protein subunit beta OS=Nematostella vectensis OX=45351 GN=v1g181966 PE=3 SV=1
A7RUD3	Fascin OS=Nematostella vectensis OX=45351 GN=v1g182068 PE=3 SV=1
A7SM22	Ferritin OS=Nematostella vectensis OX=45351 GN=v1g123261 PE=3 SV=1
A7SLM6	Ferritin OS=Nematostella vectensis OX=45351 GN=v1g191126 PE=3 SV=1
A7S8I5	Ferritin OS=Nematostella vectensis OX=45351 GN=v1g208427 PE=3 SV=1
A7S629	Ferrochelatase OS=Nematostella vectensis OX=45351 GN=v1g186132 PE=3 SV=1
A7RUK6	Folate gamma-glutamyl hydrolase OS=Nematostella vectensis OX=45351 GN=v1g182128 PE=3 SV=1
A7RUK5	Folate gamma-glutamyl hydrolase OS=Nematostella vectensis OX=45351 GN=v1g182128 PE=3 SV=1
A7RKP9	Folate gamma-glutamyl hydrolase OS=Nematostella vectensis OX=45351 GN=v1g238967 PE=3 SV=1
A7RRV9	Formimidoyltransferase-cyclodeaminase OS=Nematostella vectensis OX=45351 GN=v1g162049 PE=3 SV=1
A7RFF5	Formylglycinamide ribonucleotide amidotransferase OS=Nematostella vectensis OX=45351 GN=v1g79992 PE=3 SV=1
A7SNH7	Fructose-bisphosphatase OS=Nematostella vectensis OX=45351 GN=v1g172491 PE=3 SV=1
A7SF13	Fructose-bisphosphate aldolase OS=Nematostella vectensis OX=45351 GN=v1g244812 PE=3 SV=1
A7SYK1	Fumarate hydratase OS=Nematostella vectensis OX=45351 GN=v1g237597 PE=3 SV=1
A7RY01	Fumarylacetoacetase OS=Nematostella vectensis OX=45351 GN=v1g241460 PE=3 SV=1
A7SMJ7	G protein-coupled receptor kinase OS=Nematostella vectensis OX=45351 GN=v1g246204 PE=3 SV=1
A7S143	Gamma-cystathionase OS=Nematostella vectensis OX=45351 GN=v1g184363 PE=3 SV=1
A7S9W6	GATOR complex protein SEC13 OS=Nematostella vectensis OX=45351 GN=v1g243846 PE=3 SV=1
A7RWF3	GCS light chain OS=Nematostella vectensis OX=45351 GN=v1g95571 PE=3 SV=1
A7SMS4	GDP-4-keto-6-deoxy-D-mannose-3,5-epimerase-4-reductase OS=Nematostella vectensis OX=45351 GN=v1g124032 PE=3 SV=1
A7T0R9	GDP-D-mannose dehydratase OS=Nematostella vectensis OX=45351 GN=v1g248392 PE=3 SV=1
A7S0N7	GlcNAc kinase OS=Nematostella vectensis OX=45351 GN=v1g204972 PE=3 SV=1
A7RND1	Glucosamine-6-phosphate isomerase OS=Nematostella vectensis OX=45351 GN=v1g180131 PE=3 SV=1
A7SRK6	Glucose-6-phosphate 1-dehydrogenase OS=Nematostella vectensis OX=45351 GN=v1g246951 PE=3 SV=1
A7SGU1	Glucose-6-phosphate isomerase OS=Nematostella vectensis OX=45351 GN=v1g189712 PE=3 SV=1
A7SJQ2	Glucosidase 2 subunit beta OS=Nematostella vectensis OX=45351 GN=v1g245724 PE=4 SV=1
A7SE06	Glutamate dehydrogenase OS=Nematostella vectensis OX=45351 GN=v1g169502 PE=3 SV=1
A7T660	Glutamate dehydrogenase OS=Nematostella vectensis OX=45351 GN=v1g222874 PE=3 SV=1
A7RFX2	Glutamate dehydrogenase OS=Nematostella vectensis OX=45351 GN=v1g227888 PE=3 SV=1
A7S6F3	Glutamate dehydrogenase OS=Nematostella vectensis OX=45351 GN=v1g243194 PE=3 SV=1
A7RQE0	Glutamate--cysteine ligase (Fragment) OS=Nematostella vectensis OX=45351 GN=v1g180776 PE=3 SV=1
A7SNA7	Glutamine amidotransferase OS=Nematostella vectensis OX=45351 GN=v1g191624 PE=4 SV=1
A7S6S5	Glutamine synthetase OS=Nematostella vectensis OX=45351 GN=v1g243257 PE=3 SV=1
A7SXV0	Glutamine--fructose-6-phosphate transaminase (isomerizing) OS=Nematostella vectensis OX=45351 GN=v1g175439 PE=4 SV=1
A7SRT3	Glutaminyl-peptide cyclotransferase (Fragment) OS=Nematostella vectensis OX=45351 GN=v1g12286 PE=3 SV=1
A7S8N2	Glutaminyl-tRNA synthetase OS=Nematostella vectensis OX=45351 GN=v1g167786 PE=3 SV=1
A7RH41	Glutathione peroxidase OS=Nematostella vectensis OX=45351 GN=v1g238222 PE=3 SV=1
A7RYC0	Glutathione reductase OS=Nematostella vectensis OX=45351 GN=v1g164144 PE=3 SV=1
A7SFL2	Glutathione S-transferase kappa OS=Nematostella vectensis OX=45351 GN=v1g244928 PE=3 SV=1
A7SEA2	Glutathione S-transferase omega OS=Nematostella vectensis OX=45351 GN=v1g210927 PE=3 SV=1
A7RJG9	Glutathione S-transferase omega OS=Nematostella vectensis OX=45351 GN=v1g83876 PE=3 SV=1
A7STC4	Glutathione synthetase OS=Nematostella vectensis OX=45351 GN=v1g130991 PE=3 SV=1
A7S182	Glutathione transferase (Fragment) OS=Nematostella vectensis OX=45351 GN=v1g226731 PE=3 SV=1
A7S183	Glutathione transferase OS=Nematostella vectensis OX=45351 GN=v1g184426 PE=3 SV=1
A7RIJ8	Glutathione transferase OS=Nematostella vectensis OX=45351 GN=v1g82570 PE=3 SV=1
A7S5Y2	Glyceraldehyde-3-phosphate dehydrogenase OS=Nematostella vectensis OX=45351 GN=v1g243086 PE=3 SV=1
A7SFV6	Glycerol-3-phosphate dehydrogenase [NAD(+)] OS=Nematostella vectensis OX=45351 GN=v1g211642 PE=3 SV=1
A7SPN7	Glycerol-3-phosphate dehydrogenase OS=Nematostella vectensis OX=45351 GN=v1g246617 PE=3 SV=1
A7SK04	Glycine amidinotransferase OS=Nematostella vectensis OX=45351 GN=v1g213452 PE=3 SV=1
A7RHF2	Glycine cleavage system H protein (Fragment) OS=Nematostella vectensis OX=45351 GN=v1g81576 PE=3 SV=1
A7SR35	Glycine dehydrogenase (aminomethyl-transferring) OS=Nematostella vectensis OX=45351 GN=v1g173380 PE=4 SV=1
A7S060	Glycine hydroxymethyltransferase (Fragment) OS=Nematostella vectensis OX=45351 GN=v1g184037 PE=3 SV=1
A7SSQ7	Glycine N-methyltransferase OS=Nematostella vectensis OX=45351 GN=v1g173936 PE=3 SV=1
A7RZD4	Glycogen [starch] synthase OS=Nematostella vectensis OX=45351 GN=v1g164483 PE=3 SV=1
A7SPM6	Glycylpeptide N-tetradecanoyltransferase OS=Nematostella vectensis OX=45351 GN=v1g172911 PE=3 SV=1
A7RM33	Glyoxalase domain-containing protein 4 OS=Nematostella vectensis OX=45351 GN=v1g179620 PE=3 SV=1
A7S7N5	Glyoxalase I OS=Nematostella vectensis OX=45351 GN=v1g236995 PE=3 SV=1
A7SWU4	GMP reductase (Fragment) OS=Nematostella vectensis OX=45351 GN=v1g227565 PE=3 SV=1
A7RMW1	GrpE protein homolog OS=Nematostella vectensis OX=45351 GN=v1g179966 PE=3 SV=1
A7TDI5	GTP cyclohydrolase 1 (Fragment) OS=Nematostella vectensis OX=45351 GN=v1g156255 PE=3 SV=1
A7RNY6	GTP cyclohydrolase 1 OS=Nematostella vectensis OX=45351 GN=v1g199909 PE=3 SV=1
A7S170	GTP:AMP phosphotransferase, mitochondrial OS=Nematostella vectensis OX=45351 GN=v1g184404 PE=3 SV=1
A7SG05	GTP-binding nuclear protein OS=Nematostella vectensis OX=45351 GN=v1g170199 PE=3 SV=1
A7SI97	Guanine nucleotide-binding protein subunit gamma OS=Nematostella vectensis OX=45351 GN=v1g212694 PE=3 SV=1
A7SRN1	H(+)-transporting two-sector ATPase OS=Nematostella vectensis OX=45351 GN=v1g246966 PE=3 SV=1
A7S9Q5	H/ACA ribonucleoprotein complex subunit OS=Nematostella vectensis OX=45351 GN=v1g110216 PE=3 SV=1
A7RR93	HECT-type E3 ubiquitin transferase OS=Nematostella vectensis OX=45351 GN=v1g161803 PE=4 SV=1
A7T0T1	Hemerythrin-like protein OS=Nematostella vectensis OX=45351 GN=v1g220584 PE=3 SV=1
A7S848	Hexosyltransferase OS=Nematostella vectensis OX=45351 GN=v1g243504 PE=3 SV=1
A7RNI1	Histidine ammonia-lyase OS=Nematostella vectensis OX=45351 GN=v1g160941 PE=3 SV=1
A7S3F9	Histidine--tRNA ligase OS=Nematostella vectensis OX=45351 GN=v1g185216 PE=3 SV=1
A7RFA3	Histone deacetylase (Fragment) OS=Nematostella vectensis OX=45351 GN=v1g79092 PE=3 SV=1
A7RPX5	Histone H2A (Fragment) OS=Nematostella vectensis OX=45351 GN=v1g47042 PE=3 SV=1
A7T8N1	Histone H2A OS=Nematostella vectensis OX=45351 GN=v1g150398 PE=3 SV=1
A7RFQ0	Histone H2A OS=Nematostella vectensis OX=45351 GN=v1g177240 PE=3 SV=1
A7RQH8	Histone H2A OS=Nematostella vectensis OX=45351 GN=v1g180812 PE=3 SV=1
A7RJL4	Histone H2A OS=Nematostella vectensis OX=45351 GN=v1g83640 PE=3 SV=1
A7SGX3	Histone H2B (Fragment) OS=Nematostella vectensis OX=45351 GN=v1g58200 PE=3 SV=1
A7T1L2	Histone H2B OS=Nematostella vectensis OX=45351 GN=v1g141884 PE=3 SV=1
A7RJM8	Histone H2B OS=Nematostella vectensis OX=45351 GN=v1g198116 PE=3 SV=1
A7RPX4	Histone H2B OS=Nematostella vectensis OX=45351 GN=v1g228495 PE=3 SV=1
A7RJL3	Histone H2B OS=Nematostella vectensis OX=45351 GN=v1g83818 PE=3 SV=1
A7S6Z7	Histone H4 OS=Nematostella vectensis OX=45351 GN=v1g207796 PE=3 SV=1
A7RPG9	Homogentisate 1,2-dioxygenase OS=Nematostella vectensis OX=45351 GN=v1g239778 PE=3 SV=1
A7STM7	Hypoxanthine phosphoribosyltransferase (Fragment) OS=Nematostella vectensis OX=45351 GN=v1g131270 PE=3 SV=1
A7RNH9	Imidazolonepropionate hydrolase OS=Nematostella vectensis OX=45351 GN=v1g239590 PE=3 SV=1
A7T055	Importin subunit alpha OS=Nematostella vectensis OX=45351 GN=v1g195115 PE=3 SV=1
A7SNY2	Inorganic diphosphatase OS=Nematostella vectensis OX=45351 GN=v1g191879 PE=3 SV=1
A7RG06	Inosine-5'-monophosphate dehydrogenase OS=Nematostella vectensis OX=45351 GN=v1g177384 PE=3 SV=1
A7S400	Inositol-1-monophosphatase OS=Nematostella vectensis OX=45351 GN=v1g166138 PE=3 SV=1
A7RRW0	Integrin beta (Fragment) OS=Nematostella vectensis OX=45351 GN=v1g91193 PE=3 SV=1
A7SB90	Intraflagellar transport protein 122 homolog OS=Nematostella vectensis OX=45351 GN=v1g244089 PE=4 SV=1
A7SW83	Intraflagellar transport protein 46 homolog (Fragment) OS=Nematostella vectensis OX=45351 GN=v1g174974 PE=3 SV=1
A7RQB2	Isoamyl acetate-hydrolyzing esterase 1 homolog (Fragment) OS=Nematostella vectensis OX=45351 GN=v1g89791 PE=3 SV=1
A7SPW9	Isocitrate dehydrogenase [NAD] subunit, mitochondrial OS=Nematostella vectensis OX=45351 GN=v1g173016 PE=3 SV=1
A7SJV9	Isocitrate dehydrogenase [NAD] subunit, mitochondrial OS=Nematostella vectensis OX=45351 GN=v1g245762 PE=3 SV=1
A7S378	Isocitrate dehydrogenase [NADP] OS=Nematostella vectensis OX=45351 GN=v1g185113 PE=3 SV=1
A7S2F7	Isocitrate dehydrogenase [NADP] OS=Nematostella vectensis OX=45351 GN=v1g205753 PE=3 SV=1
A7SCA3	Isoleucyl-tRNA synthetase OS=Nematostella vectensis OX=45351 GN=v1g168885 PE=3 SV=1
A7SV12	Katanin p80 WD40 repeat-containing subunit B1 OS=Nematostella vectensis OX=45351 GN=KATNB1 PE=3 SV=1
A7SZA6	Ketimine reductase mu-crystallin OS=Nematostella vectensis OX=45351 GN=v1g194939 PE=4 SV=1
A7RUT6	Kinesin-like protein (Fragment) OS=Nematostella vectensis OX=45351 GN=v1g94108 PE=3 SV=1
A7SMW7	L-2-hydroxyglutarate dehydrogenase, mitochondrial OS=Nematostella vectensis OX=45351 GN=v1g172254 PE=3 SV=1
A7RFI0	Late endosomal/lysosomal adaptor and MAPK and MTOR activator 1 OS=Nematostella vectensis OX=45351 GN=v1g237860 PE=3 SV=1
A7RW33	Leishmanolysin-like peptidase OS=Nematostella vectensis OX=45351 GN=v1g203012 PE=3 SV=1
A7T0N0	Leucine zipper and CTNNBIP1 domain-containing protein OS=Nematostella vectensis OX=45351 GN=v1g175999 PE=3 SV=1
A7RRK9	Leucine zipper transcription factor-like protein 1 (Fragment) OS=Nematostella vectensis OX=45351 GN=v1g91032 PE=3 SV=1
A7S766	Leucyl-tRNA synthetase OS=Nematostella vectensis OX=45351 GN=v1g107058 PE=3 SV=1
A7SS27	Leukotriene A(4) hydrolase OS=Nematostella vectensis OX=45351 GN=v1g247046 PE=3 SV=1
A7RF96	L-fuconate dehydratase OS=Nematostella vectensis OX=45351 GN=v1g157829 PE=4 SV=1
A7S338	Lissencephaly-1 homolog OS=Nematostella vectensis OX=45351 GN=v1g242515 PE=3 SV=1
A7RTH9	Low-density lipoprotein receptor relative with 11 ligand-binding repeats OS=Nematostella vectensis OX=45351 GN=v1g240569 PE=3 SV=1
A7S2W5	Lysine--2-oxoglutarate reductase OS=Nematostella vectensis OX=45351 GN=v1g165768 PE=3 SV=1
A7RR97	Lysine--tRNA ligase OS=Nematostella vectensis OX=45351 GN=v1g228574 PE=3 SV=1
A7S0T1	Mab21-like 2 OS=Nematostella vectensis OX=45351 GN=v1g242056 PE=2 SV=1
A7SJL4	Major vault protein OS=Nematostella vectensis OX=45351 GN=v1g190506 PE=4 SV=1
A7RH80	Major vault protein OS=Nematostella vectensis OX=45351 GN=v1g238247 PE=4 SV=1
A7T1J0	Malate dehydrogenase OS=Nematostella vectensis OX=45351 GN=v1g248519 PE=3 SV=1
A7S4V3	Malate dehydrogenase, cytoplasmic OS=Nematostella vectensis OX=45351 GN=v1g185681 PE=3 SV=1
A7S756	Malate synthase (Fragment) OS=Nematostella vectensis OX=45351 GN=v1g107098 PE=4 SV=1
A7RM90	Malate synthase OS=Nematostella vectensis OX=45351 GN=v1g160432 PE=3 SV=1
A7S7Y8	Maleylacetoacetate isomerase OS=Nematostella vectensis OX=45351 GN=v1g186779 PE=3 SV=1
A7SRZ0	Malic enzyme OS=Nematostella vectensis OX=45351 GN=v1g173675 PE=3 SV=1
A7RT58	Mannose-1-phosphate guanylyltransferase OS=Nematostella vectensis OX=45351 GN=v1g162365 PE=4 SV=1
A7RZU9	Menin OS=Nematostella vectensis OX=45351 GN=v1g241841 PE=1 SV=1
A7SHE2	Metalloendopeptidase (Fragment) OS=Nematostella vectensis OX=45351 GN=v1g118469 PE=4 SV=1
A7SJI3	Metalloendopeptidase (Fragment) OS=Nematostella vectensis OX=45351 GN=v1g120666 PE=4 SV=1
A7T0S0	Metalloendopeptidase (Fragment) OS=Nematostella vectensis OX=45351 GN=v1g140744 PE=4 SV=1
A7SYW4	Metalloendopeptidase (Fragment) OS=Nematostella vectensis OX=45351 GN=v1g1679 PE=4 SV=1
A7T4M8	Metalloendopeptidase (Fragment) OS=Nematostella vectensis OX=45351 GN=v1g7293 PE=4 SV=1
A7RH94	Metalloendopeptidase (Fragment) OS=Nematostella vectensis OX=45351 GN=v1g81453 PE=4 SV=1
A7SHE3	Metalloendopeptidase OS=Nematostella vectensis OX=45351 GN=v1g118459 PE=4 SV=1
A7SJ13	Metalloendopeptidase OS=Nematostella vectensis OX=45351 GN=v1g120119 PE=4 SV=1
A7S0V4	Metalloendopeptidase OS=Nematostella vectensis OX=45351 GN=v1g232545 PE=4 SV=1
A7S728	Metalloendopeptidase OS=Nematostella vectensis OX=45351 GN=v1g232813 PE=4 SV=1
A7RZN5	Metalloendopeptidase OS=Nematostella vectensis OX=45351 GN=v1g98917 PE=4 SV=1
A7RT23	Methionine aminopeptidase 2 OS=Nematostella vectensis OX=45351 GN=v1g181577 PE=3 SV=1
A7SGK6	Methionine aminopeptidase OS=Nematostella vectensis OX=45351 GN=v1g245141 PE=3 SV=1
A7SPM9	Methionine--tRNA ligase, cytoplasmic (Fragment) OS=Nematostella vectensis OX=45351 GN=v1g10320 PE=3 SV=1
A7RHJ6	Methylmalonyl-CoA mutase OS=Nematostella vectensis OX=45351 GN=v1g238314 PE=3 SV=1
A7SEL8	MICOS complex subunit MIC10 OS=Nematostella vectensis OX=45351 GN=v1g211075 PE=3 SV=1
A7SYX7	MICOS complex subunit MIC60 (Fragment) OS=Nematostella vectensis OX=45351 GN=v1g50774 PE=3 SV=1
A7T1E2	Microsomal epoxide hydrolase (Fragment) OS=Nematostella vectensis OX=45351 GN=v1g141685 PE=3 SV=1
A7SCR5	Microsomal signal peptidase 12 kDa subunit OS=Nematostella vectensis OX=45351 GN=v1g169043 PE=3 SV=1
A7SPU1	Mitochondrial import receptor subunit TOM22 homolog (Fragment) OS=Nematostella vectensis OX=45351 GN=v1g126388 PE=3 SV=1
A7SFQ0	Mitogen-activated protein kinase OS=Nematostella vectensis OX=45351 GN=v1g116697 PE=3 SV=1
A7RNM4	Mitogen-activated protein kinase OS=Nematostella vectensis OX=45351 GN=v1g180219 PE=4 SV=1
A7S6Z4	mRNA (guanine-N(7))-methyltransferase (Fragment) OS=Nematostella vectensis OX=45351 GN=v1g12461 PE=3 SV=1
A7S7A5	Multifunctional fusion protein OS=Nematostella vectensis OX=45351 GN=v1g186547 PE=3 SV=1
A7RWR1	Myophilin-like protein OS=Nematostella vectensis OX=45351 GN=v1g203298 PE=2 SV=1
A7SCE5	N.vectensis toxin 1 7 OS=Nematostella vectensis OX=45351 GN=v1g113105 PE=1 SV=2
A7SBC9	N-acetylglucosamine-6-phosphate deacetylase OS=Nematostella vectensis OX=45351 GN=v1g168601 PE=3 SV=1
A7RPT4	NAD(P)H-hydrate epimerase OS=Nematostella vectensis OX=45351 GN=v1g228490 PE=3 SV=1
A7RT53	NADH dehydrogenase [ubiquinone] 1 alpha subcomplex subunit 12 OS=Nematostella vectensis OX=45351 GN=v1g181597 PE=3 SV=1
A7S864	NADH dehydrogenase [ubiquinone] 1 alpha subcomplex subunit 13 OS=Nematostella vectensis OX=45351 GN=v1g108313 PE=3 SV=1
A7SCQ9	NADH dehydrogenase [ubiquinone] 1 beta subcomplex subunit 10 OS=Nematostella vectensis OX=45351 GN=v1g210238 PE=3 SV=1
A7SNI1	NADH dehydrogenase [ubiquinone] 1 beta subcomplex subunit 7 OS=Nematostella vectensis OX=45351 GN=v1g172495 PE=3 SV=1
A7RTS0	NADH dehydrogenase [ubiquinone] 1 beta subcomplex subunit 7 OS=Nematostella vectensis OX=45351 GN=v1g232250 PE=3 SV=1
A7RST7	NADH dehydrogenase [ubiquinone] flavoprotein 1, mitochondrial OS=Nematostella vectensis OX=45351 GN=v1g181539 PE=3 SV=1
A7SGV0	NADH dehydrogenase [ubiquinone] iron-sulfur protein 3, mitochondrial (Fragment) OS=Nematostella vectensis OX=45351 GN=v1g25207 PE=3 SV=1
A7SYP5	NADH dehydrogenase [ubiquinone] iron-sulfur protein 4, mitochondrial OS=Nematostella vectensis OX=45351 GN=v1g236104 PE=3 SV=1
A7S8X8	NADH-cytochrome b5 reductase OS=Nematostella vectensis OX=45351 GN=v1g167869 PE=3 SV=1
A7RI03	NADH-ubiquinone oxidoreductase 75 kDa subunit, mitochondrial (Fragment) OS=Nematostella vectensis OX=45351 GN=v1g226219 PE=3 SV=1
A7RU46	Nck-associated protein 1 homolog OS=Nematostella vectensis OX=45351 GN=napA PE=3 SV=1
A7RJ12	Nematocyst expressed protein 3 OS=Nematostella vectensis OX=45351 GN=v1g238654 PE=1 SV=1
A7RJ13	Nematocyst expressed protein 3-like OS=Nematostella vectensis OX=45351 GN=v1g238655 PE=2 SV=1
A7RNZ0	Nematocyst expressed protein 4 OS=Nematostella vectensis OX=45351 GN=v1g239676 PE=1 SV=1
A7SXG9	Nematocyst expressed protein 8 OS=Nematostella vectensis OX=45351 GN=v1g219037 PE=1 SV=2
A7SNU3	Nicalin OS=Nematostella vectensis OX=45351 GN=v1g191831 PE=3 SV=1
A7SD25	Nicastrin OS=Nematostella vectensis OX=45351 GN=v1g244413 PE=3 SV=1
A7RQ43	Nicotinate phosphoribosyltransferase OS=Nematostella vectensis OX=45351 GN=v1g89511 PE=3 SV=1
A7SWM6	Non-specific serine/threonine protein kinase (Fragment) OS=Nematostella vectensis OX=45351 GN=v1g135493 PE=3 SV=1
A7ST31	Non-specific serine/threonine protein kinase OS=Nematostella vectensis OX=45351 GN=v1g130600 PE=4 SV=1
A7SRJ0	Non-specific serine/threonine protein kinase OS=Nematostella vectensis OX=45351 GN=v1g216329 PE=4 SV=1
A7S521	Non-specific serine/threonine protein kinase OS=Nematostella vectensis OX=45351 GN=v1g232710 PE=3 SV=1
A7SCW2	NSFL1 cofactor p47 OS=Nematostella vectensis OX=45351 GN=v1g113586 PE=4 SV=1
A7S3U8	Nuclear pore protein OS=Nematostella vectensis OX=45351 GN=v1g242660 PE=3 SV=1
A7S3U4	Nucleolar protein 10 OS=Nematostella vectensis OX=45351 GN=v1g103779 PE=3 SV=1
A7S2B8	Nucleoredoxin OS=Nematostella vectensis OX=45351 GN=v1g184789 PE=3 SV=1
A7SE68	Nucleoside diphosphate kinase OS=Nematostella vectensis OX=45351 GN=v1g169568 PE=3 SV=1
A7SHY3	NudC domain-containing protein 1 OS=Nematostella vectensis OX=45351 GN=v1g235501 PE=4 SV=1
A7S018	Obg-like ATPase 1 OS=Nematostella vectensis OX=45351 GN=v1g164749 PE=3 SV=1
A7RV06	Ornithine carbamoyltransferase, mitochondrial OS=Nematostella vectensis OX=45351 GN=v1g182282 PE=3 SV=1
A7RIC3	Ornithine--oxo-acid aminotransferase OS=Nematostella vectensis OX=45351 GN=v1g159041 PE=3 SV=1
A7RZQ9	Oxoglutarate dehydrogenase (succinyl-transferring) OS=Nematostella vectensis OX=45351 GN=v1g183837 PE=3 SV=1
A7SGK7	Oxoglutarate dehydrogenase (succinyl-transferring) OS=Nematostella vectensis OX=45351 GN=v1g189628 PE=3 SV=1
A7SK18	Oxysterol-binding protein (Fragment) OS=Nematostella vectensis OX=45351 GN=v1g50345 PE=3 SV=1
A7S9F2	Palmitoyl-protein hydrolase 1 OS=Nematostella vectensis OX=45351 GN=v1g187212 PE=3 SV=1
A7S548	Paxillin (Fragment) OS=Nematostella vectensis OX=45351 GN=v1g104924 PE=4 SV=1
A7RL04	Pentaxin OS=Nematostella vectensis OX=45351 GN=v1g179157 PE=3 SV=1
A7SUT4	Peptidase M20 domain-containing protein 2 OS=Nematostella vectensis OX=45351 GN=v1g132910 PE=3 SV=1
A7RFH7	Peptidase M20 domain-containing protein 2 OS=Nematostella vectensis OX=45351 GN=v1g227851 PE=3 SV=1
A7RQQ7	Peptide-methionine (R)-S-oxide reductase (Fragment) OS=Nematostella vectensis OX=45351 GN=v1g90236 PE=3 SV=1
A7SNT2	Peptidylglycine monooxygenase OS=Nematostella vectensis OX=45351 GN=v1g172604 PE=4 SV=1
A7SPI1	Peptidylglycine monooxygenase OS=Nematostella vectensis OX=45351 GN=v1g230646 PE=4 SV=1
A7SIW4	Peptidyl-prolyl cis-trans isomerase (Fragment) OS=Nematostella vectensis OX=45351 GN=v1g119994 PE=3 SV=1
A7S1Q9	Peptidyl-prolyl cis-trans isomerase OS=Nematostella vectensis OX=45351 GN=v1g165372 PE=3 SV=1
A7SG38	Peptidyl-prolyl cis-trans isomerase OS=Nematostella vectensis OX=45351 GN=v1g170242 PE=4 SV=1
A7SNV5	Peptidyl-prolyl cis-trans isomerase OS=Nematostella vectensis OX=45351 GN=v1g191841 PE=3 SV=1
A7SNV4	Peptidyl-prolyl cis-trans isomerase OS=Nematostella vectensis OX=45351 GN=v1g215109 PE=3 SV=1
A7SNV6	Peptidyl-prolyl cis-trans isomerase OS=Nematostella vectensis OX=45351 GN=v1g215113 PE=3 SV=1
A7SXN2	Peptidyl-prolyl cis-trans isomerase OS=Nematostella vectensis OX=45351 GN=v1g237586 PE=3 SV=1
A7SPD7	Peptidylprolyl isomerase (Fragment) OS=Nematostella vectensis OX=45351 GN=v1g125997 PE=4 SV=1
A7S7R3	Peptidylprolyl isomerase (Fragment) OS=Nematostella vectensis OX=45351 GN=v1g28706 PE=4 SV=1
A7SRS8	Peptidylprolyl isomerase OS=Nematostella vectensis OX=45351 GN=v1g129106 PE=4 SV=1
A7SY88	Peptidylprolyl isomerase OS=Nematostella vectensis OX=45351 GN=v1g137650 PE=4 SV=1
A7RZA5	Peptidylprolyl isomerase OS=Nematostella vectensis OX=45351 GN=v1g183679 PE=4 SV=1
A7RLX5	Peptidylprolyl isomerase OS=Nematostella vectensis OX=45351 GN=v1g236459 PE=4 SV=1
A7SG98	Peroxiredoxin-5 OS=Nematostella vectensis OX=45351 GN=v1g211830 PE=3 SV=1
A7SP79	Phenylalanine--tRNA ligase OS=Nematostella vectensis OX=45351 GN=v1g172762 PE=3 SV=1
A7SEN4	Phenylalanyl-tRNA synthetase beta subunit OS=Nematostella vectensis OX=45351 GN=v1g188942 PE=3 SV=1
A7SWV8	Phosphate carrier protein, mitochondrial OS=Nematostella vectensis OX=45351 GN=v1g194342 PE=3 SV=1
A7S9P1	Phosphatidate cytidylyltransferase OS=Nematostella vectensis OX=45351 GN=v1g235152 PE=3 SV=1
A7SM03	Phosphatidylinositol 4-kinase type 2 OS=Nematostella vectensis OX=45351 GN=v1g123184 PE=3 SV=1
A7S2H7	Phosphoacetylglucosamine mutase OS=Nematostella vectensis OX=45351 GN=v1g242391 PE=3 SV=1
A7SFK7	Phosphodiesterase delta-like protein OS=Nematostella vectensis OX=45351 GN=v1g189274 PE=3 SV=1
A7S418	Phosphoenolpyruvate carboxykinase (GTP) OS=Nematostella vectensis OX=45351 GN=v1g103590 PE=3 SV=1
A7S416	Phosphoenolpyruvate carboxykinase (GTP) OS=Nematostella vectensis OX=45351 GN=v1g166166 PE=3 SV=1
A7S417	Phosphoenolpyruvate carboxykinase (GTP) OS=Nematostella vectensis OX=45351 GN=v1g166171 PE=3 SV=1
A7SG07	Phosphoenolpyruvate mutase OS=Nematostella vectensis OX=45351 GN=v1g189422 PE=4 SV=1
A7SDH5	Phosphoglucomutase (alpha-D-glucose-1,6-bisphosphate-dependent) OS=Nematostella vectensis OX=45351 GN=v1g235307 PE=3 SV=1
A7RZB7	Phosphoglycerate mutase (2,3-diphosphoglycerate-independent) OS=Nematostella vectensis OX=45351 GN=v1g183697 PE=3 SV=1
A7S421	Phosphoinositide phospholipase C (Fragment) OS=Nematostella vectensis OX=45351 GN=v1g103663 PE=4 SV=1
A7SDH9	Phosphoinositide phospholipase C (Fragment) OS=Nematostella vectensis OX=45351 GN=v1g114299 PE=4 SV=1
A7SMY6	Phosphoinositide phospholipase C (Fragment) OS=Nematostella vectensis OX=45351 GN=v1g124290 PE=4 SV=1
A7RXP6	Phosphoinositide phospholipase C (Fragment) OS=Nematostella vectensis OX=45351 GN=v1g174 PE=4 SV=1
A7RMR9	Phospholipase A2 OS=Nematostella vectensis OX=45351 GN=v1g199410 PE=3 SV=1
A7SNJ7	Phospholipase A2 OS=Nematostella vectensis OX=45351 GN=v1g246390 PE=3 SV=1
A7S118	Phospholipase B-like (Fragment) OS=Nematostella vectensis OX=45351 GN=v1g100394 PE=3 SV=1
A7S8R6	Phospholipase B-like OS=Nematostella vectensis OX=45351 GN=v1g167825 PE=3 SV=1
A7SXP9	Phospholipid scramblase OS=Nematostella vectensis OX=45351 GN=v1g194606 PE=3 SV=1
A7RKH5	Phosphomannomutase OS=Nematostella vectensis OX=45351 GN=v1g159761 PE=3 SV=1
A7RZJ9	Phosphotransferase OS=Nematostella vectensis OX=45351 GN=v1g229061 PE=3 SV=1
A7RFA1	Phosphotriesterase-related protein OS=Nematostella vectensis OX=45351 GN=v1g177083 PE=3 SV=1
A7RWZ2	Pinin OS=Nematostella vectensis OX=45351 GN=v1g232373 PE=3 SV=1
A7S3I0	Plasma membrane calcium ATPase isoform 1 (Fragment) OS=Nematostella vectensis OX=45351 GN=v1g166011 PE=3 SV=1
A7RNW1	Poly [ADP-ribose] polymerase (Fragment) OS=Nematostella vectensis OX=45351 GN=v1g88355 PE=4 SV=1
A7T589	Poly(A) polymerase OS=Nematostella vectensis OX=45351 GN=v1g176602 PE=3 SV=1
A7SSV8	Polyadenylate-binding protein OS=Nematostella vectensis OX=45351 GN=v1g230864 PE=3 SV=1
A7RP27	Polynucleotide phosphorylase 1 (Fragment) OS=Nematostella vectensis OX=45351 GN=v1g30443 PE=3 SV=1
A7SU04	Polyol dehydrogenase OS=Nematostella vectensis OX=45351 GN=v1g193535 PE=3 SV=1
A7SRV9	POU domain protein (Fragment) OS=Nematostella vectensis OX=45351 GN=v1g129257 PE=3 SV=1
A7S0Q7	Predicted protein (Fragment) OS=Nematostella vectensis OX=45351 GN=v1g100030 PE=3 SV=1
A7S0W4	Predicted protein (Fragment) OS=Nematostella vectensis OX=45351 GN=v1g100273 PE=3 SV=1
A7S119	Predicted protein (Fragment) OS=Nematostella vectensis OX=45351 GN=v1g100451 PE=3 SV=1
A7S166	Predicted protein (Fragment) OS=Nematostella vectensis OX=45351 GN=v1g100491 PE=4 SV=1
A7S1I5	Predicted protein (Fragment) OS=Nematostella vectensis OX=45351 GN=v1g100694 PE=4 SV=1
A7S1E8	Predicted protein (Fragment) OS=Nematostella vectensis OX=45351 GN=v1g100737 PE=3 SV=1
A7SS78	Predicted protein (Fragment) OS=Nematostella vectensis OX=45351 GN=v1g10117 PE=4 SV=1
A7S268	Predicted protein (Fragment) OS=Nematostella vectensis OX=45351 GN=v1g101462 PE=3 SV=1
A7S254	Predicted protein (Fragment) OS=Nematostella vectensis OX=45351 GN=v1g101727 PE=4 SV=1
A7S2H6	Predicted protein (Fragment) OS=Nematostella vectensis OX=45351 GN=v1g101837 PE=4 SV=1
A7S2N3	Predicted protein (Fragment) OS=Nematostella vectensis OX=45351 GN=v1g102079 PE=4 SV=1
A7S2M1	Predicted protein (Fragment) OS=Nematostella vectensis OX=45351 GN=v1g102219 PE=4 SV=1
A7S2T1	Predicted protein (Fragment) OS=Nematostella vectensis OX=45351 GN=v1g102323 PE=4 SV=1
A7S2T6	Predicted protein (Fragment) OS=Nematostella vectensis OX=45351 GN=v1g102466 PE=4 SV=1
A7S321	Predicted protein (Fragment) OS=Nematostella vectensis OX=45351 GN=v1g102518 PE=3 SV=1
A7S362	Predicted protein (Fragment) OS=Nematostella vectensis OX=45351 GN=v1g102786 PE=4 SV=1
A7S3A0	Predicted protein (Fragment) OS=Nematostella vectensis OX=45351 GN=v1g102827 PE=4 SV=1
A7S3J6	Predicted protein (Fragment) OS=Nematostella vectensis OX=45351 GN=v1g102981 PE=4 SV=1
A7S3J2	Predicted protein (Fragment) OS=Nematostella vectensis OX=45351 GN=v1g102986 PE=4 SV=1
A7S3R1	Predicted protein (Fragment) OS=Nematostella vectensis OX=45351 GN=v1g103289 PE=4 SV=1
A7S424	Predicted protein (Fragment) OS=Nematostella vectensis OX=45351 GN=v1g103923 PE=4 SV=1
A7S475	Predicted protein (Fragment) OS=Nematostella vectensis OX=45351 GN=v1g104083 PE=4 SV=1
A7S4T4	Predicted protein (Fragment) OS=Nematostella vectensis OX=45351 GN=v1g104827 PE=4 SV=1
A7S4Z2	Predicted protein (Fragment) OS=Nematostella vectensis OX=45351 GN=v1g104847 PE=3 SV=1
A7S593	Predicted protein (Fragment) OS=Nematostella vectensis OX=45351 GN=v1g105181 PE=4 SV=1
A7S5A0	Predicted protein (Fragment) OS=Nematostella vectensis OX=45351 GN=v1g105193 PE=3 SV=1
A7S5M4	Predicted protein (Fragment) OS=Nematostella vectensis OX=45351 GN=v1g105460 PE=4 SV=1
A7S5K1	Predicted protein (Fragment) OS=Nematostella vectensis OX=45351 GN=v1g105508 PE=3 SV=1
A7S5L3	Predicted protein (Fragment) OS=Nematostella vectensis OX=45351 GN=v1g105540 PE=3 SV=1
A7S5Y0	Predicted protein (Fragment) OS=Nematostella vectensis OX=45351 GN=v1g105779 PE=4 SV=1
A7S690	Predicted protein (Fragment) OS=Nematostella vectensis OX=45351 GN=v1g106028 PE=3 SV=1
A7S6H4	Predicted protein (Fragment) OS=Nematostella vectensis OX=45351 GN=v1g106450 PE=3 SV=1
A7S6J9	Predicted protein (Fragment) OS=Nematostella vectensis OX=45351 GN=v1g106465 PE=4 SV=1
A7S6Z3	Predicted protein (Fragment) OS=Nematostella vectensis OX=45351 GN=v1g106963 PE=4 SV=1
A7S6X5	Predicted protein (Fragment) OS=Nematostella vectensis OX=45351 GN=v1g107027 PE=4 SV=1
A7S752	Predicted protein (Fragment) OS=Nematostella vectensis OX=45351 GN=v1g107042 PE=4 SV=1
A7S771	Predicted protein (Fragment) OS=Nematostella vectensis OX=45351 GN=v1g107236 PE=4 SV=1
A7S7C6	Predicted protein (Fragment) OS=Nematostella vectensis OX=45351 GN=v1g107451 PE=4 SV=1
A7S7L6	Predicted protein (Fragment) OS=Nematostella vectensis OX=45351 GN=v1g108033 PE=4 SV=1
A7S7V5	Predicted protein (Fragment) OS=Nematostella vectensis OX=45351 GN=v1g108202 PE=4 SV=1
A7S7V3	Predicted protein (Fragment) OS=Nematostella vectensis OX=45351 GN=v1g108246 PE=4 SV=1
A7S841	Predicted protein (Fragment) OS=Nematostella vectensis OX=45351 GN=v1g108425 PE=4 SV=1
A7S886	Predicted protein (Fragment) OS=Nematostella vectensis OX=45351 GN=v1g108550 PE=3 SV=1
A7S8S5	Predicted protein (Fragment) OS=Nematostella vectensis OX=45351 GN=v1g108947 PE=3 SV=1
A7S8Y4	Predicted protein (Fragment) OS=Nematostella vectensis OX=45351 GN=v1g109213 PE=4 SV=1
A7S8Y5	Predicted protein (Fragment) OS=Nematostella vectensis OX=45351 GN=v1g109239 PE=4 SV=1
A7S9K1	Predicted protein (Fragment) OS=Nematostella vectensis OX=45351 GN=v1g110002 PE=4 SV=1
A7S9M1	Predicted protein (Fragment) OS=Nematostella vectensis OX=45351 GN=v1g110033 PE=3 SV=1
A7S9M0	Predicted protein (Fragment) OS=Nematostella vectensis OX=45351 GN=v1g110064 PE=4 SV=1
A7SM69	Predicted protein (Fragment) OS=Nematostella vectensis OX=45351 GN=v1g11026 PE=4 SV=1
A7S9V3	Predicted protein (Fragment) OS=Nematostella vectensis OX=45351 GN=v1g110350 PE=4 SV=1
A7SA12	Predicted protein (Fragment) OS=Nematostella vectensis OX=45351 GN=v1g110416 PE=3 SV=1
A7SA16	Predicted protein (Fragment) OS=Nematostella vectensis OX=45351 GN=v1g110469 PE=4 SV=1
A7SA42	Predicted protein (Fragment) OS=Nematostella vectensis OX=45351 GN=v1g110650 PE=4 SV=1
A7SAF0	Predicted protein (Fragment) OS=Nematostella vectensis OX=45351 GN=v1g110929 PE=4 SV=1
A7S2H5	Predicted protein (Fragment) OS=Nematostella vectensis OX=45351 GN=v1g11096 PE=4 SV=1
A7SAN7	Predicted protein (Fragment) OS=Nematostella vectensis OX=45351 GN=v1g111113 PE=4 SV=1
A7SAU9	Predicted protein (Fragment) OS=Nematostella vectensis OX=45351 GN=v1g111416 PE=3 SV=1
A7SAW2	Predicted protein (Fragment) OS=Nematostella vectensis OX=45351 GN=v1g111502 PE=4 SV=1
A7SB04	Predicted protein (Fragment) OS=Nematostella vectensis OX=45351 GN=v1g111823 PE=4 SV=1
A7SB49	Predicted protein (Fragment) OS=Nematostella vectensis OX=45351 GN=v1g111951 PE=4 SV=1
A7SSQ6	Predicted protein (Fragment) OS=Nematostella vectensis OX=45351 GN=v1g11203 PE=4 SV=1
A7SBB1	Predicted protein (Fragment) OS=Nematostella vectensis OX=45351 GN=v1g112072 PE=4 SV=1
A7SBG9	Predicted protein (Fragment) OS=Nematostella vectensis OX=45351 GN=v1g112221 PE=4 SV=1
A7SBH3	Predicted protein (Fragment) OS=Nematostella vectensis OX=45351 GN=v1g112267 PE=3 SV=1
A7SBG8	Predicted protein (Fragment) OS=Nematostella vectensis OX=45351 GN=v1g112324 PE=4 SV=1
A7SBU1	Predicted protein (Fragment) OS=Nematostella vectensis OX=45351 GN=v1g112522 PE=3 SV=1
A7SC84	Predicted protein (Fragment) OS=Nematostella vectensis OX=45351 GN=v1g112968 PE=4 SV=1
A7SCE8	Predicted protein (Fragment) OS=Nematostella vectensis OX=45351 GN=v1g113239 PE=3 SV=1
A7SCN6	Predicted protein (Fragment) OS=Nematostella vectensis OX=45351 GN=v1g113484 PE=3 SV=1
A7SCV6	Predicted protein (Fragment) OS=Nematostella vectensis OX=45351 GN=v1g113598 PE=4 SV=1
A7SCS4	Predicted protein (Fragment) OS=Nematostella vectensis OX=45351 GN=v1g113611 PE=4 SV=1
A7SCV8	Predicted protein (Fragment) OS=Nematostella vectensis OX=45351 GN=v1g113651 PE=4 SV=1
A7SCR7	Predicted protein (Fragment) OS=Nematostella vectensis OX=45351 GN=v1g113654 PE=4 SV=1
A7SCV7	Predicted protein (Fragment) OS=Nematostella vectensis OX=45351 GN=v1g113718 PE=4 SV=1
A7SCV5	Predicted protein (Fragment) OS=Nematostella vectensis OX=45351 GN=v1g113727 PE=4 SV=1
A7SDE3	Predicted protein (Fragment) OS=Nematostella vectensis OX=45351 GN=v1g114170 PE=3 SV=1
A7SSG8	Predicted protein (Fragment) OS=Nematostella vectensis OX=45351 GN=v1g11424 PE=4 SV=1
A7SDU8	Predicted protein (Fragment) OS=Nematostella vectensis OX=45351 GN=v1g114476 PE=4 SV=1
A7SDT0	Predicted protein (Fragment) OS=Nematostella vectensis OX=45351 GN=v1g114506 PE=3 SV=1
A7SDW1	Predicted protein (Fragment) OS=Nematostella vectensis OX=45351 GN=v1g114661 PE=3 SV=1
A7SEP3	Predicted protein (Fragment) OS=Nematostella vectensis OX=45351 GN=v1g115454 PE=4 SV=1
A7SEW2	Predicted protein (Fragment) OS=Nematostella vectensis OX=45351 GN=v1g115630 PE=3 SV=1
A7SF84	Predicted protein (Fragment) OS=Nematostella vectensis OX=45351 GN=v1g116212 PE=4 SV=1
A7SFE0	Predicted protein (Fragment) OS=Nematostella vectensis OX=45351 GN=v1g116416 PE=3 SV=1
A7SFN4	Predicted protein (Fragment) OS=Nematostella vectensis OX=45351 GN=v1g116591 PE=3 SV=1
A7SFX4	Predicted protein (Fragment) OS=Nematostella vectensis OX=45351 GN=v1g116741 PE=4 SV=1
A7SFY6	Predicted protein (Fragment) OS=Nematostella vectensis OX=45351 GN=v1g116912 PE=4 SV=1
A7SG22	Predicted protein (Fragment) OS=Nematostella vectensis OX=45351 GN=v1g116927 PE=4 SV=1
A7SGM4	Predicted protein (Fragment) OS=Nematostella vectensis OX=45351 GN=v1g117600 PE=4 SV=1
A7SBY8	Predicted protein (Fragment) OS=Nematostella vectensis OX=45351 GN=v1g11770 PE=3 SV=1
A7SH12	Predicted protein (Fragment) OS=Nematostella vectensis OX=45351 GN=v1g118014 PE=4 SV=1
A7SH59	Predicted protein (Fragment) OS=Nematostella vectensis OX=45351 GN=v1g118171 PE=4 SV=1
A7SH93	Predicted protein (Fragment) OS=Nematostella vectensis OX=45351 GN=v1g118229 PE=3 SV=1
A7SH92	Predicted protein (Fragment) OS=Nematostella vectensis OX=45351 GN=v1g118263 PE=3 SV=1
A7SH91	Predicted protein (Fragment) OS=Nematostella vectensis OX=45351 GN=v1g118268 PE=3 SV=1
A7SHM9	Predicted protein (Fragment) OS=Nematostella vectensis OX=45351 GN=v1g118750 PE=4 SV=1
A7SHW7	Predicted protein (Fragment) OS=Nematostella vectensis OX=45351 GN=v1g118934 PE=4 SV=1
A7SI28	Predicted protein (Fragment) OS=Nematostella vectensis OX=45351 GN=v1g119021 PE=3 SV=1
A7SIF0	Predicted protein (Fragment) OS=Nematostella vectensis OX=45351 GN=v1g119483 PE=4 SV=1
A7SIN3	Predicted protein (Fragment) OS=Nematostella vectensis OX=45351 GN=v1g119733 PE=3 SV=1
A7SJE2	Predicted protein (Fragment) OS=Nematostella vectensis OX=45351 GN=v1g120496 PE=4 SV=1
A7SXP0	Predicted protein (Fragment) OS=Nematostella vectensis OX=45351 GN=v1g12051 PE=3 SV=1
A7SJF6	Predicted protein (Fragment) OS=Nematostella vectensis OX=45351 GN=v1g120521 PE=3 SV=1
A7SJJ1	Predicted protein (Fragment) OS=Nematostella vectensis OX=45351 GN=v1g120633 PE=3 SV=1
A7SJW1	Predicted protein (Fragment) OS=Nematostella vectensis OX=45351 GN=v1g120931 PE=3 SV=1
A7SJW5	Predicted protein (Fragment) OS=Nematostella vectensis OX=45351 GN=v1g120998 PE=4 SV=1
A7SK32	Predicted protein (Fragment) OS=Nematostella vectensis OX=45351 GN=v1g121164 PE=4 SV=1
A7SAI2	Predicted protein (Fragment) OS=Nematostella vectensis OX=45351 GN=v1g12130 PE=4 SV=1
A7SKJ0	Predicted protein (Fragment) OS=Nematostella vectensis OX=45351 GN=v1g121670 PE=4 SV=1
A7SKL9	Predicted protein (Fragment) OS=Nematostella vectensis OX=45351 GN=v1g121800 PE=4 SV=1
A7SKL8	Predicted protein (Fragment) OS=Nematostella vectensis OX=45351 GN=v1g121854 PE=4 SV=1
A7SKX2	Predicted protein (Fragment) OS=Nematostella vectensis OX=45351 GN=v1g122070 PE=4 SV=1
A7SL02	Predicted protein (Fragment) OS=Nematostella vectensis OX=45351 GN=v1g122152 PE=4 SV=1
A7SL23	Predicted protein (Fragment) OS=Nematostella vectensis OX=45351 GN=v1g122234 PE=4 SV=1
A7SL99	Predicted protein (Fragment) OS=Nematostella vectensis OX=45351 GN=v1g122369 PE=4 SV=1
A7SLF0	Predicted protein (Fragment) OS=Nematostella vectensis OX=45351 GN=v1g122551 PE=4 SV=1
A7SLI7	Predicted protein (Fragment) OS=Nematostella vectensis OX=45351 GN=v1g122819 PE=3 SV=1
A7SLR7	Predicted protein (Fragment) OS=Nematostella vectensis OX=45351 GN=v1g122997 PE=4 SV=1
A7SLW7	Predicted protein (Fragment) OS=Nematostella vectensis OX=45351 GN=v1g123125 PE=3 SV=1
A7SLZ6	Predicted protein (Fragment) OS=Nematostella vectensis OX=45351 GN=v1g123159 PE=4 SV=1
A7SLX6	Predicted protein (Fragment) OS=Nematostella vectensis OX=45351 GN=v1g123220 PE=4 SV=1
A7SM91	Predicted protein (Fragment) OS=Nematostella vectensis OX=45351 GN=v1g123513 PE=4 SV=1
A7SME8	Predicted protein (Fragment) OS=Nematostella vectensis OX=45351 GN=v1g123682 PE=3 SV=1
A7SMG3	Predicted protein (Fragment) OS=Nematostella vectensis OX=45351 GN=v1g123730 PE=4 SV=1
A7SNA0	Predicted protein (Fragment) OS=Nematostella vectensis OX=45351 GN=v1g124567 PE=3 SV=1
A7SNB8	Predicted protein (Fragment) OS=Nematostella vectensis OX=45351 GN=v1g124644 PE=4 SV=1
A7SND8	Predicted protein (Fragment) OS=Nematostella vectensis OX=45351 GN=v1g124706 PE=4 SV=1
A7SND5	Predicted protein (Fragment) OS=Nematostella vectensis OX=45351 GN=v1g124712 PE=4 SV=1
A7SND7	Predicted protein (Fragment) OS=Nematostella vectensis OX=45351 GN=v1g124735 PE=4 SV=1
A7SNH4	Predicted protein (Fragment) OS=Nematostella vectensis OX=45351 GN=v1g124889 PE=3 SV=1
A7SNJ9	Predicted protein (Fragment) OS=Nematostella vectensis OX=45351 GN=v1g124911 PE=4 SV=1
A7SNJ3	Predicted protein (Fragment) OS=Nematostella vectensis OX=45351 GN=v1g124935 PE=4 SV=1
A7SNM7	Predicted protein (Fragment) OS=Nematostella vectensis OX=45351 GN=v1g125015 PE=3 SV=1
A7SNM5	Predicted protein (Fragment) OS=Nematostella vectensis OX=45351 GN=v1g125072 PE=4 SV=1
A7SP48	Predicted protein (Fragment) OS=Nematostella vectensis OX=45351 GN=v1g125664 PE=3 SV=1
A7SP47	Predicted protein (Fragment) OS=Nematostella vectensis OX=45351 GN=v1g125694 PE=3 SV=1
A7SPA4	Predicted protein (Fragment) OS=Nematostella vectensis OX=45351 GN=v1g125875 PE=4 SV=1
A7SQ19	Predicted protein (Fragment) OS=Nematostella vectensis OX=45351 GN=v1g127025 PE=4 SV=1
A7SQ31	Predicted protein (Fragment) OS=Nematostella vectensis OX=45351 GN=v1g127058 PE=4 SV=1
A7SQ46	Predicted protein (Fragment) OS=Nematostella vectensis OX=45351 GN=v1g127166 PE=3 SV=1
A7SQ87	Predicted protein (Fragment) OS=Nematostella vectensis OX=45351 GN=v1g127212 PE=4 SV=1
A7SQI5	Predicted protein (Fragment) OS=Nematostella vectensis OX=45351 GN=v1g127574 PE=3 SV=1
A7SQI3	Predicted protein (Fragment) OS=Nematostella vectensis OX=45351 GN=v1g127599 PE=3 SV=1
A7SQM8	Predicted protein (Fragment) OS=Nematostella vectensis OX=45351 GN=v1g127783 PE=4 SV=1
A7SQS0	Predicted protein (Fragment) OS=Nematostella vectensis OX=45351 GN=v1g127874 PE=3 SV=1
A7SQY5	Predicted protein (Fragment) OS=Nematostella vectensis OX=45351 GN=v1g128127 PE=4 SV=1
A7SQX2	Predicted protein (Fragment) OS=Nematostella vectensis OX=45351 GN=v1g128140 PE=4 SV=1
A7SR75	Predicted protein (Fragment) OS=Nematostella vectensis OX=45351 GN=v1g128497 PE=3 SV=1
A7SR69	Predicted protein (Fragment) OS=Nematostella vectensis OX=45351 GN=v1g128500 PE=3 SV=1
A7SR76	Predicted protein (Fragment) OS=Nematostella vectensis OX=45351 GN=v1g128516 PE=3 SV=1
A7SR98	Predicted protein (Fragment) OS=Nematostella vectensis OX=45351 GN=v1g128612 PE=3 SV=1
A7T115	Predicted protein (Fragment) OS=Nematostella vectensis OX=45351 GN=v1g12872 PE=4 SV=1
A7SRH0	Predicted protein (Fragment) OS=Nematostella vectensis OX=45351 GN=v1g128801 PE=4 SV=1
A7SRP6	Predicted protein (Fragment) OS=Nematostella vectensis OX=45351 GN=v1g129041 PE=4 SV=1
A7SRS3	Predicted protein (Fragment) OS=Nematostella vectensis OX=45351 GN=v1g129111 PE=3 SV=1
A7SRS2	Predicted protein (Fragment) OS=Nematostella vectensis OX=45351 GN=v1g129113 PE=3 SV=1
A7SS13	Predicted protein (Fragment) OS=Nematostella vectensis OX=45351 GN=v1g129323 PE=3 SV=1
A7SS26	Predicted protein (Fragment) OS=Nematostella vectensis OX=45351 GN=v1g129376 PE=4 SV=1
A7SS64	Predicted protein (Fragment) OS=Nematostella vectensis OX=45351 GN=v1g129447 PE=4 SV=1
A7SSA8	Predicted protein (Fragment) OS=Nematostella vectensis OX=45351 GN=v1g129669 PE=4 SV=1
A7SS96	Predicted protein (Fragment) OS=Nematostella vectensis OX=45351 GN=v1g129670 PE=4 SV=1
A7SSE0	Predicted protein (Fragment) OS=Nematostella vectensis OX=45351 GN=v1g129741 PE=4 SV=1
A7SSE1	Predicted protein (Fragment) OS=Nematostella vectensis OX=45351 GN=v1g129799 PE=4 SV=1
A7SSJ4	Predicted protein (Fragment) OS=Nematostella vectensis OX=45351 GN=v1g129931 PE=4 SV=1
A7SSH2	Predicted protein (Fragment) OS=Nematostella vectensis OX=45351 GN=v1g129973 PE=4 SV=1
A7SSL9	Predicted protein (Fragment) OS=Nematostella vectensis OX=45351 GN=v1g130055 PE=3 SV=1
A7SSM9	Predicted protein (Fragment) OS=Nematostella vectensis OX=45351 GN=v1g130123 PE=3 SV=1
A7SSU4	Predicted protein (Fragment) OS=Nematostella vectensis OX=45351 GN=v1g130363 PE=3 SV=1
A7ST03	Predicted protein (Fragment) OS=Nematostella vectensis OX=45351 GN=v1g130495 PE=3 SV=1
A7ST89	Predicted protein (Fragment) OS=Nematostella vectensis OX=45351 GN=v1g130825 PE=4 SV=1
A7ST97	Predicted protein (Fragment) OS=Nematostella vectensis OX=45351 GN=v1g130842 PE=3 SV=1
A7STB9	Predicted protein (Fragment) OS=Nematostella vectensis OX=45351 GN=v1g130928 PE=4 SV=1
A7STF1	Predicted protein (Fragment) OS=Nematostella vectensis OX=45351 GN=v1g131043 PE=3 SV=1
A7SU58	Predicted protein (Fragment) OS=Nematostella vectensis OX=45351 GN=v1g131865 PE=3 SV=1
A7SUA9	Predicted protein (Fragment) OS=Nematostella vectensis OX=45351 GN=v1g132059 PE=3 SV=1
A7SUG0	Predicted protein (Fragment) OS=Nematostella vectensis OX=45351 GN=v1g132292 PE=4 SV=1
A7SV57	Predicted protein (Fragment) OS=Nematostella vectensis OX=45351 GN=v1g133 PE=4 SV=1
A7SV23	Predicted protein (Fragment) OS=Nematostella vectensis OX=45351 GN=v1g133516 PE=4 SV=1
A7SV94	Predicted protein (Fragment) OS=Nematostella vectensis OX=45351 GN=v1g133819 PE=4 SV=1
A7SVY3	Predicted protein (Fragment) OS=Nematostella vectensis OX=45351 GN=v1g134593 PE=4 SV=1
A7SW17	Predicted protein (Fragment) OS=Nematostella vectensis OX=45351 GN=v1g134716 PE=3 SV=1
A7SW43	Predicted protein (Fragment) OS=Nematostella vectensis OX=45351 GN=v1g134867 PE=4 SV=1
A7SV44	Predicted protein (Fragment) OS=Nematostella vectensis OX=45351 GN=v1g13494 PE=4 SV=1
A7SWB1	Predicted protein (Fragment) OS=Nematostella vectensis OX=45351 GN=v1g135045 PE=4 SV=1
A7SWI4	Predicted protein (Fragment) OS=Nematostella vectensis OX=45351 GN=v1g135318 PE=4 SV=1
A7SWY1	Predicted protein (Fragment) OS=Nematostella vectensis OX=45351 GN=v1g135928 PE=4 SV=1
A7SWX7	Predicted protein (Fragment) OS=Nematostella vectensis OX=45351 GN=v1g135950 PE=4 SV=1
A7SX44	Predicted protein (Fragment) OS=Nematostella vectensis OX=45351 GN=v1g136284 PE=3 SV=1
A7SX85	Predicted protein (Fragment) OS=Nematostella vectensis OX=45351 GN=v1g136469 PE=4 SV=1
A7SXE6	Predicted protein (Fragment) OS=Nematostella vectensis OX=45351 GN=v1g136666 PE=4 SV=1
A7SXL0	Predicted protein (Fragment) OS=Nematostella vectensis OX=45351 GN=v1g136834 PE=4 SV=1
A7SXW2	Predicted protein (Fragment) OS=Nematostella vectensis OX=45351 GN=v1g137206 PE=3 SV=1
A7SY30	Predicted protein (Fragment) OS=Nematostella vectensis OX=45351 GN=v1g137448 PE=4 SV=1
A7SYA7	Predicted protein (Fragment) OS=Nematostella vectensis OX=45351 GN=v1g137713 PE=4 SV=1
A7SYD1	Predicted protein (Fragment) OS=Nematostella vectensis OX=45351 GN=v1g137751 PE=3 SV=1
A7SYN7	Predicted protein (Fragment) OS=Nematostella vectensis OX=45351 GN=v1g138104 PE=4 SV=1
A7SYP9	Predicted protein (Fragment) OS=Nematostella vectensis OX=45351 GN=v1g138173 PE=4 SV=1
A7SYQ8	Predicted protein (Fragment) OS=Nematostella vectensis OX=45351 GN=v1g138198 PE=4 SV=1
A7SYS0	Predicted protein (Fragment) OS=Nematostella vectensis OX=45351 GN=v1g138243 PE=4 SV=1
A7T0N4	Predicted protein (Fragment) OS=Nematostella vectensis OX=45351 GN=v1g140631 PE=4 SV=1
A7T0Q4	Predicted protein (Fragment) OS=Nematostella vectensis OX=45351 GN=v1g140661 PE=4 SV=1
A7T0T5	Predicted protein (Fragment) OS=Nematostella vectensis OX=45351 GN=v1g140821 PE=4 SV=1
A7T0W4	Predicted protein (Fragment) OS=Nematostella vectensis OX=45351 GN=v1g140878 PE=4 SV=1
A7T157	Predicted protein (Fragment) OS=Nematostella vectensis OX=45351 GN=v1g141364 PE=4 SV=1
A7T1B0	Predicted protein (Fragment) OS=Nematostella vectensis OX=45351 GN=v1g141604 PE=4 SV=1
A7T1I6	Predicted protein (Fragment) OS=Nematostella vectensis OX=45351 GN=v1g141808 PE=4 SV=1
A7T1P4	Predicted protein (Fragment) OS=Nematostella vectensis OX=45351 GN=v1g142051 PE=3 SV=1
A7T1P3	Predicted protein (Fragment) OS=Nematostella vectensis OX=45351 GN=v1g142057 PE=3 SV=1
A7T1P5	Predicted protein (Fragment) OS=Nematostella vectensis OX=45351 GN=v1g142064 PE=4 SV=1
A7T1R7	Predicted protein (Fragment) OS=Nematostella vectensis OX=45351 GN=v1g142145 PE=4 SV=1
A7T1S0	Predicted protein (Fragment) OS=Nematostella vectensis OX=45351 GN=v1g142157 PE=4 SV=1
A7T1S4	Predicted protein (Fragment) OS=Nematostella vectensis OX=45351 GN=v1g142175 PE=4 SV=1
A7T1U2	Predicted protein (Fragment) OS=Nematostella vectensis OX=45351 GN=v1g142236 PE=4 SV=1
A7T1V6	Predicted protein (Fragment) OS=Nematostella vectensis OX=45351 GN=v1g142280 PE=4 SV=1
A7T1Y6	Predicted protein (Fragment) OS=Nematostella vectensis OX=45351 GN=v1g142436 PE=4 SV=1
A7T2M7	Predicted protein (Fragment) OS=Nematostella vectensis OX=45351 GN=v1g143309 PE=4 SV=1
A7T2U1	Predicted protein (Fragment) OS=Nematostella vectensis OX=45351 GN=v1g143489 PE=4 SV=1
A7T3U2	Predicted protein (Fragment) OS=Nematostella vectensis OX=45351 GN=v1g144787 PE=4 SV=1
A7T3Y0	Predicted protein (Fragment) OS=Nematostella vectensis OX=45351 GN=v1g144926 PE=4 SV=1
A7T445	Predicted protein (Fragment) OS=Nematostella vectensis OX=45351 GN=v1g145164 PE=4 SV=1
A7T444	Predicted protein (Fragment) OS=Nematostella vectensis OX=45351 GN=v1g145169 PE=4 SV=1
A7T4A3	Predicted protein (Fragment) OS=Nematostella vectensis OX=45351 GN=v1g145353 PE=4 SV=1
A7T6D8	Predicted protein (Fragment) OS=Nematostella vectensis OX=45351 GN=v1g147756 PE=3 SV=1
A7T6L9	Predicted protein (Fragment) OS=Nematostella vectensis OX=45351 GN=v1g147994 PE=3 SV=1
A7T6T0	Predicted protein (Fragment) OS=Nematostella vectensis OX=45351 GN=v1g148195 PE=3 SV=1
A7T700	Predicted protein (Fragment) OS=Nematostella vectensis OX=45351 GN=v1g148426 PE=3 SV=1
A7T726	Predicted protein (Fragment) OS=Nematostella vectensis OX=45351 GN=v1g148507 PE=4 SV=1
A7T773	Predicted protein (Fragment) OS=Nematostella vectensis OX=45351 GN=v1g148607 PE=3 SV=1
A7T7B5	Predicted protein (Fragment) OS=Nematostella vectensis OX=45351 GN=v1g148720 PE=4 SV=1
A7T7R0	Predicted protein (Fragment) OS=Nematostella vectensis OX=45351 GN=v1g149214 PE=3 SV=1
A7T8C0	Predicted protein (Fragment) OS=Nematostella vectensis OX=45351 GN=v1g149996 PE=4 SV=1
A7T8H0	Predicted protein (Fragment) OS=Nematostella vectensis OX=45351 GN=v1g150208 PE=4 SV=1
A7T9A3	Predicted protein (Fragment) OS=Nematostella vectensis OX=45351 GN=v1g151082 PE=4 SV=1
A7T9E0	Predicted protein (Fragment) OS=Nematostella vectensis OX=45351 GN=v1g151209 PE=4 SV=1
A7TA21	Predicted protein (Fragment) OS=Nematostella vectensis OX=45351 GN=v1g151935 PE=3 SV=1
A7TAA0	Predicted protein (Fragment) OS=Nematostella vectensis OX=45351 GN=v1g152177 PE=3 SV=1
A7TAJ1	Predicted protein (Fragment) OS=Nematostella vectensis OX=45351 GN=v1g152446 PE=4 SV=1
A7SCE7	Predicted protein (Fragment) OS=Nematostella vectensis OX=45351 GN=v1g15302 PE=3 SV=1
A8DV00	Predicted protein (Fragment) OS=Nematostella vectensis OX=45351 GN=v1g153189 PE=4 SV=1
A8DV03	Predicted protein (Fragment) OS=Nematostella vectensis OX=45351 GN=v1g153193 PE=4 SV=1
A7TBC8	Predicted protein (Fragment) OS=Nematostella vectensis OX=45351 GN=v1g153393 PE=4 SV=1
A7TC67	Predicted protein (Fragment) OS=Nematostella vectensis OX=45351 GN=v1g154474 PE=3 SV=1
A8DVA9	Predicted protein (Fragment) OS=Nematostella vectensis OX=45351 GN=v1g155794 PE=4 SV=1
A8DVB0	Predicted protein (Fragment) OS=Nematostella vectensis OX=45351 GN=v1g155941 PE=3 SV=1
A8DVF1	Predicted protein (Fragment) OS=Nematostella vectensis OX=45351 GN=v1g156386 PE=3 SV=1
A8DVJ2	Predicted protein (Fragment) OS=Nematostella vectensis OX=45351 GN=v1g156512 PE=4 SV=1
A8DVW7	Predicted protein (Fragment) OS=Nematostella vectensis OX=45351 GN=v1g156832 PE=3 SV=1
A8DWA9	Predicted protein (Fragment) OS=Nematostella vectensis OX=45351 GN=v1g157231 PE=4 SV=1
A7RKJ0	Predicted protein (Fragment) OS=Nematostella vectensis OX=45351 GN=v1g159777 PE=4 SV=1
A7RLT1	Predicted protein (Fragment) OS=Nematostella vectensis OX=45351 GN=v1g160244 PE=3 SV=1
A7RZ98	Predicted protein (Fragment) OS=Nematostella vectensis OX=45351 GN=v1g164443 PE=4 SV=1
A7S1K9	Predicted protein (Fragment) OS=Nematostella vectensis OX=45351 GN=v1g165346 PE=4 SV=1
A7SWX9	Predicted protein (Fragment) OS=Nematostella vectensis OX=45351 GN=v1g16611 PE=4 SV=1
A7SFM8	Predicted protein (Fragment) OS=Nematostella vectensis OX=45351 GN=v1g170078 PE=3 SV=1
A7SHC3	Predicted protein (Fragment) OS=Nematostella vectensis OX=45351 GN=v1g170650 PE=4 SV=1
A7SM92	Predicted protein (Fragment) OS=Nematostella vectensis OX=45351 GN=v1g172080 PE=4 SV=1
A7SP21	Predicted protein (Fragment) OS=Nematostella vectensis OX=45351 GN=v1g172689 PE=4 SV=1
A7SR73	Predicted protein (Fragment) OS=Nematostella vectensis OX=45351 GN=v1g173414 PE=3 SV=1
A7SV21	Predicted protein (Fragment) OS=Nematostella vectensis OX=45351 GN=v1g174671 PE=4 SV=1
A7T0C0	Predicted protein (Fragment) OS=Nematostella vectensis OX=45351 GN=v1g175950 PE=4 SV=1
A7SNM6	Predicted protein (Fragment) OS=Nematostella vectensis OX=45351 GN=v1g17632 PE=3 SV=1
A7SNJ2	Predicted protein (Fragment) OS=Nematostella vectensis OX=45351 GN=v1g17980 PE=4 SV=1
A7RX82	Predicted protein (Fragment) OS=Nematostella vectensis OX=45351 GN=v1g182990 PE=4 SV=1
A7S1W8	Predicted protein (Fragment) OS=Nematostella vectensis OX=45351 GN=v1g184640 PE=3 SV=1
A7SFY3	Predicted protein (Fragment) OS=Nematostella vectensis OX=45351 GN=v1g189386 PE=4 SV=1
A7T2W7	Predicted protein (Fragment) OS=Nematostella vectensis OX=45351 GN=v1g19046 PE=4 SV=1
A7SRT1	Predicted protein (Fragment) OS=Nematostella vectensis OX=45351 GN=v1g192832 PE=4 SV=1
A7SS67	Predicted protein (Fragment) OS=Nematostella vectensis OX=45351 GN=v1g192951 PE=4 SV=1
A7SWI7	Predicted protein (Fragment) OS=Nematostella vectensis OX=45351 GN=v1g194278 PE=3 SV=1
A7SRZ8	Predicted protein (Fragment) OS=Nematostella vectensis OX=45351 GN=v1g19525 PE=4 SV=1
A7T2F6	Predicted protein (Fragment) OS=Nematostella vectensis OX=45351 GN=v1g195585 PE=4 SV=1
A7SBU2	Predicted protein (Fragment) OS=Nematostella vectensis OX=45351 GN=v1g1957 PE=4 SV=1
A7RG19	Predicted protein (Fragment) OS=Nematostella vectensis OX=45351 GN=v1g196670 PE=4 SV=1
A7S3A8	Predicted protein (Fragment) OS=Nematostella vectensis OX=45351 GN=v1g20072 PE=3 SV=1
A7S157	Predicted protein (Fragment) OS=Nematostella vectensis OX=45351 GN=v1g20232 PE=4 SV=1
A7RUJ3	Predicted protein (Fragment) OS=Nematostella vectensis OX=45351 GN=v1g202369 PE=4 SV=1
A7RVK8	Predicted protein (Fragment) OS=Nematostella vectensis OX=45351 GN=v1g202784 PE=4 SV=1
A7RW64	Predicted protein (Fragment) OS=Nematostella vectensis OX=45351 GN=v1g203043 PE=3 SV=1
A7S347	Predicted protein (Fragment) OS=Nematostella vectensis OX=45351 GN=v1g20376 PE=3 SV=1
A7S2N1	Predicted protein (Fragment) OS=Nematostella vectensis OX=45351 GN=v1g205845 PE=4 SV=1
A7S5K7	Predicted protein (Fragment) OS=Nematostella vectensis OX=45351 GN=v1g207152 PE=4 SV=1
A7S970	Predicted protein (Fragment) OS=Nematostella vectensis OX=45351 GN=v1g208718 PE=3 SV=1
A7SAV1	Predicted protein (Fragment) OS=Nematostella vectensis OX=45351 GN=v1g209417 PE=4 SV=1
A7S2E0	Predicted protein (Fragment) OS=Nematostella vectensis OX=45351 GN=v1g21003 PE=4 SV=1
A7SG61	Predicted protein (Fragment) OS=Nematostella vectensis OX=45351 GN=v1g211784 PE=4 SV=1
A7SK12	Predicted protein (Fragment) OS=Nematostella vectensis OX=45351 GN=v1g213468 PE=4 SV=1
A7SZF8	Predicted protein (Fragment) OS=Nematostella vectensis OX=45351 GN=v1g2158 PE=4 SV=1
A7SRV3	Predicted protein (Fragment) OS=Nematostella vectensis OX=45351 GN=v1g216470 PE=3 SV=1
A7SRW4	Predicted protein (Fragment) OS=Nematostella vectensis OX=45351 GN=v1g216486 PE=4 SV=1
A7ST50	Predicted protein (Fragment) OS=Nematostella vectensis OX=45351 GN=v1g217091 PE=4 SV=1
A7SJJ3	Predicted protein (Fragment) OS=Nematostella vectensis OX=45351 GN=v1g21807 PE=4 SV=1
A7SZF3	Predicted protein (Fragment) OS=Nematostella vectensis OX=45351 GN=v1g219949 PE=4 SV=1
A7T0T8	Predicted protein (Fragment) OS=Nematostella vectensis OX=45351 GN=v1g220599 PE=4 SV=1
A7T319	Predicted protein (Fragment) OS=Nematostella vectensis OX=45351 GN=v1g221615 PE=3 SV=1
A7T357	Predicted protein (Fragment) OS=Nematostella vectensis OX=45351 GN=v1g221660 PE=4 SV=1
A7T431	Predicted protein (Fragment) OS=Nematostella vectensis OX=45351 GN=v1g222046 PE=4 SV=1
A7T4H9	Predicted protein (Fragment) OS=Nematostella vectensis OX=45351 GN=v1g222219 PE=4 SV=1
A7T4U8	Predicted protein (Fragment) OS=Nematostella vectensis OX=45351 GN=v1g222349 PE=4 SV=1
A7T5G1	Predicted protein (Fragment) OS=Nematostella vectensis OX=45351 GN=v1g222586 PE=4 SV=1
A7T5K1	Predicted protein (Fragment) OS=Nematostella vectensis OX=45351 GN=v1g222634 PE=4 SV=1
A7T6M6	Predicted protein (Fragment) OS=Nematostella vectensis OX=45351 GN=v1g223067 PE=3 SV=1
A7T6Q4	Predicted protein (Fragment) OS=Nematostella vectensis OX=45351 GN=v1g223100 PE=4 SV=1
A7T734	Predicted protein (Fragment) OS=Nematostella vectensis OX=45351 GN=v1g223229 PE=4 SV=1
A7T7Y4	Predicted protein (Fragment) OS=Nematostella vectensis OX=45351 GN=v1g223574 PE=4 SV=1
A7T8Z0	Predicted protein (Fragment) OS=Nematostella vectensis OX=45351 GN=v1g223980 PE=4 SV=1
A8DUW1	Predicted protein (Fragment) OS=Nematostella vectensis OX=45351 GN=v1g224047 PE=3 SV=1
A8DUW3	Predicted protein (Fragment) OS=Nematostella vectensis OX=45351 GN=v1g224063 PE=4 SV=1
A7T9L7	Predicted protein (Fragment) OS=Nematostella vectensis OX=45351 GN=v1g224212 PE=4 SV=1
A7T9M9	Predicted protein (Fragment) OS=Nematostella vectensis OX=45351 GN=v1g224223 PE=4 SV=1
A7TAX7	Predicted protein (Fragment) OS=Nematostella vectensis OX=45351 GN=v1g224672 PE=4 SV=1
A7TBM4	Predicted protein (Fragment) OS=Nematostella vectensis OX=45351 GN=v1g224897 PE=4 SV=1
A7TC10	Predicted protein (Fragment) OS=Nematostella vectensis OX=45351 GN=v1g225027 PE=4 SV=1
A8DWJ6	Predicted protein (Fragment) OS=Nematostella vectensis OX=45351 GN=v1g226019 PE=4 SV=1
A7S5F7	Predicted protein (Fragment) OS=Nematostella vectensis OX=45351 GN=v1g226856 PE=3 SV=1
A7SDL8	Predicted protein (Fragment) OS=Nematostella vectensis OX=45351 GN=v1g227079 PE=3 SV=1
A7SJJ7	Predicted protein (Fragment) OS=Nematostella vectensis OX=45351 GN=v1g227259 PE=3 SV=1
A7SBY9	Predicted protein (Fragment) OS=Nematostella vectensis OX=45351 GN=v1g22881 PE=3 SV=1
A7S8B6	Predicted protein (Fragment) OS=Nematostella vectensis OX=45351 GN=v1g23194 PE=4 SV=1
A7RSI8	Predicted protein (Fragment) OS=Nematostella vectensis OX=45351 GN=v1g232211 PE=4 SV=1
A7S1M3	Predicted protein (Fragment) OS=Nematostella vectensis OX=45351 GN=v1g232575 PE=4 SV=1
A7SC74	Predicted protein (Fragment) OS=Nematostella vectensis OX=45351 GN=v1g23919 PE=4 SV=1
A7RQL5	Predicted protein (Fragment) OS=Nematostella vectensis OX=45351 GN=v1g239997 PE=4 SV=1
A7S3J0	Predicted protein (Fragment) OS=Nematostella vectensis OX=45351 GN=v1g242616 PE=3 SV=1
A7S406	Predicted protein (Fragment) OS=Nematostella vectensis OX=45351 GN=v1g242699 PE=4 SV=1
A7SBY7	Predicted protein (Fragment) OS=Nematostella vectensis OX=45351 GN=v1g24372 PE=3 SV=1
A7S5C1	Predicted protein (Fragment) OS=Nematostella vectensis OX=45351 GN=v1g24516 PE=3 SV=1
A7T4Z6	Predicted protein (Fragment) OS=Nematostella vectensis OX=45351 GN=v1g248720 PE=3 SV=1
A7T574	Predicted protein (Fragment) OS=Nematostella vectensis OX=45351 GN=v1g248732 PE=4 SV=1
A7TCV6	Predicted protein (Fragment) OS=Nematostella vectensis OX=45351 GN=v1g248893 PE=4 SV=1
A8DVA3	Predicted protein (Fragment) OS=Nematostella vectensis OX=45351 GN=v1g248894 PE=4 SV=1
A7S1K0	Predicted protein (Fragment) OS=Nematostella vectensis OX=45351 GN=v1g25059 PE=4 SV=1
A7RW61	Predicted protein (Fragment) OS=Nematostella vectensis OX=45351 GN=v1g25219 PE=4 SV=1
A7SFB7	Predicted protein (Fragment) OS=Nematostella vectensis OX=45351 GN=v1g25425 PE=4 SV=1
A7T4P5	Predicted protein (Fragment) OS=Nematostella vectensis OX=45351 GN=v1g2545 PE=4 SV=1
A7RZ56	Predicted protein (Fragment) OS=Nematostella vectensis OX=45351 GN=v1g25565 PE=3 SV=1
A7RW60	Predicted protein (Fragment) OS=Nematostella vectensis OX=45351 GN=v1g25829 PE=4 SV=1
A7S377	Predicted protein (Fragment) OS=Nematostella vectensis OX=45351 GN=v1g26281 PE=4 SV=1
A7SAJ5	Predicted protein (Fragment) OS=Nematostella vectensis OX=45351 GN=v1g26678 PE=4 SV=1
A7S1Y7	Predicted protein (Fragment) OS=Nematostella vectensis OX=45351 GN=v1g2890 PE=4 SV=1
A7RYD8	Predicted protein (Fragment) OS=Nematostella vectensis OX=45351 GN=v1g29089 PE=3 SV=1
A7SI50	Predicted protein (Fragment) OS=Nematostella vectensis OX=45351 GN=v1g29235 PE=4 SV=1
A7S1S4	Predicted protein (Fragment) OS=Nematostella vectensis OX=45351 GN=v1g29735 PE=4 SV=1
A7SLB2	Predicted protein (Fragment) OS=Nematostella vectensis OX=45351 GN=v1g29793 PE=3 SV=1
A7SCI6	Predicted protein (Fragment) OS=Nematostella vectensis OX=45351 GN=v1g30450 PE=3 SV=1
A7RNN4	Predicted protein (Fragment) OS=Nematostella vectensis OX=45351 GN=v1g33556 PE=3 SV=1
A7T9N0	Predicted protein (Fragment) OS=Nematostella vectensis OX=45351 GN=v1g3418 PE=4 SV=1
A7RNN3	Predicted protein (Fragment) OS=Nematostella vectensis OX=45351 GN=v1g34292 PE=3 SV=1
A7RKG2	Predicted protein (Fragment) OS=Nematostella vectensis OX=45351 GN=v1g34397 PE=4 SV=1
A7RR65	Predicted protein (Fragment) OS=Nematostella vectensis OX=45351 GN=v1g34458 PE=4 SV=1
A7S3E4	Predicted protein (Fragment) OS=Nematostella vectensis OX=45351 GN=v1g35437 PE=4 SV=1
A7RG33	Predicted protein (Fragment) OS=Nematostella vectensis OX=45351 GN=v1g35532 PE=4 SV=1
A7RIJ4	Predicted protein (Fragment) OS=Nematostella vectensis OX=45351 GN=v1g36078 PE=4 SV=1
A7SXE4	Predicted protein (Fragment) OS=Nematostella vectensis OX=45351 GN=v1g370 PE=4 SV=1
A7RM81	Predicted protein (Fragment) OS=Nematostella vectensis OX=45351 GN=v1g38294 PE=4 SV=1
A7RYD7	Predicted protein (Fragment) OS=Nematostella vectensis OX=45351 GN=v1g39271 PE=3 SV=1
A7T278	Predicted protein (Fragment) OS=Nematostella vectensis OX=45351 GN=v1g3943 PE=4 SV=1
A7RP95	Predicted protein (Fragment) OS=Nematostella vectensis OX=45351 GN=v1g39852 PE=4 SV=1
A7SZ47	Predicted protein (Fragment) OS=Nematostella vectensis OX=45351 GN=v1g40063 PE=4 SV=1
A7SZI9	Predicted protein (Fragment) OS=Nematostella vectensis OX=45351 GN=v1g41116 PE=4 SV=1
A7T6K7	Predicted protein (Fragment) OS=Nematostella vectensis OX=45351 GN=v1g416 PE=3 SV=1
A7SW02	Predicted protein (Fragment) OS=Nematostella vectensis OX=45351 GN=v1g4199 PE=4 SV=1
A7SSS6	Predicted protein (Fragment) OS=Nematostella vectensis OX=45351 GN=v1g42184 PE=4 SV=1
A7RUF9	Predicted protein (Fragment) OS=Nematostella vectensis OX=45351 GN=v1g4553 PE=3 SV=1
A7TDG2	Predicted protein (Fragment) OS=Nematostella vectensis OX=45351 GN=v1g45829 PE=4 SV=1
A7T368	Predicted protein (Fragment) OS=Nematostella vectensis OX=45351 GN=v1g45967 PE=4 SV=1
A7TA65	Predicted protein (Fragment) OS=Nematostella vectensis OX=45351 GN=v1g46129 PE=4 SV=1
A7SFQ3	Predicted protein (Fragment) OS=Nematostella vectensis OX=45351 GN=v1g48067 PE=4 SV=1
A7T4M7	Predicted protein (Fragment) OS=Nematostella vectensis OX=45351 GN=v1g48576 PE=4 SV=1
A7T4F4	Predicted protein (Fragment) OS=Nematostella vectensis OX=45351 GN=v1g488 PE=3 SV=1
A7T9B2	Predicted protein (Fragment) OS=Nematostella vectensis OX=45351 GN=v1g49232 PE=4 SV=1
A7SHC0	Predicted protein (Fragment) OS=Nematostella vectensis OX=45351 GN=v1g50268 PE=3 SV=1
A7S9K2	Predicted protein (Fragment) OS=Nematostella vectensis OX=45351 GN=v1g50978 PE=3 SV=1
A7SM38	Predicted protein (Fragment) OS=Nematostella vectensis OX=45351 GN=v1g52158 PE=4 SV=1
A7S9M7	Predicted protein (Fragment) OS=Nematostella vectensis OX=45351 GN=v1g52380 PE=3 SV=1
A7SF05	Predicted protein (Fragment) OS=Nematostella vectensis OX=45351 GN=v1g52979 PE=4 SV=1
A7SXC4	Predicted protein (Fragment) OS=Nematostella vectensis OX=45351 GN=v1g53219 PE=3 SV=1
A7S1E7	Predicted protein (Fragment) OS=Nematostella vectensis OX=45351 GN=v1g53549 PE=3 SV=1
A7SPW3	Predicted protein (Fragment) OS=Nematostella vectensis OX=45351 GN=v1g53582 PE=3 SV=1
A7S5Z2	Predicted protein (Fragment) OS=Nematostella vectensis OX=45351 GN=v1g53664 PE=4 SV=1
A7T9Q8	Predicted protein (Fragment) OS=Nematostella vectensis OX=45351 GN=v1g5371 PE=3 SV=1
A7SIE8	Predicted protein (Fragment) OS=Nematostella vectensis OX=45351 GN=v1g54798 PE=4 SV=1
A7RN60	Predicted protein (Fragment) OS=Nematostella vectensis OX=45351 GN=v1g56592 PE=4 SV=1
A7S1M0	Predicted protein (Fragment) OS=Nematostella vectensis OX=45351 GN=v1g57994 PE=4 SV=1
A7SC87	Predicted protein (Fragment) OS=Nematostella vectensis OX=45351 GN=v1g59536 PE=4 SV=1
A7RES4	Predicted protein (Fragment) OS=Nematostella vectensis OX=45351 GN=v1g60205 PE=4 SV=1
A7T4G1	Predicted protein (Fragment) OS=Nematostella vectensis OX=45351 GN=v1g60452 PE=3 SV=1
A7RQP6	Predicted protein (Fragment) OS=Nematostella vectensis OX=45351 GN=v1g60477 PE=3 SV=1
A7SKL5	Predicted protein (Fragment) OS=Nematostella vectensis OX=45351 GN=v1g60573 PE=4 SV=1
A7RUF8	Predicted protein (Fragment) OS=Nematostella vectensis OX=45351 GN=v1g60683 PE=3 SV=1
A7T892	Predicted protein (Fragment) OS=Nematostella vectensis OX=45351 GN=v1g60834 PE=3 SV=1
A7RZB0	Predicted protein (Fragment) OS=Nematostella vectensis OX=45351 GN=v1g61262 PE=4 SV=1
A7T1A0	Predicted protein (Fragment) OS=Nematostella vectensis OX=45351 GN=v1g613 PE=3 SV=1
A7RK57	Predicted protein (Fragment) OS=Nematostella vectensis OX=45351 GN=v1g61368 PE=3 SV=1
A7RUF6	Predicted protein (Fragment) OS=Nematostella vectensis OX=45351 GN=v1g61733 PE=3 SV=1
A7RUC8	Predicted protein (Fragment) OS=Nematostella vectensis OX=45351 GN=v1g62749 PE=4 SV=1
A7RM94	Predicted protein (Fragment) OS=Nematostella vectensis OX=45351 GN=v1g63023 PE=3 SV=1
A7T6R8	Predicted protein (Fragment) OS=Nematostella vectensis OX=45351 GN=v1g6455 PE=4 SV=1
A7TAW8	Predicted protein (Fragment) OS=Nematostella vectensis OX=45351 GN=v1g6605 PE=4 SV=1
A7RG32	Predicted protein (Fragment) OS=Nematostella vectensis OX=45351 GN=v1g66338 PE=4 SV=1
A7RUL9	Predicted protein (Fragment) OS=Nematostella vectensis OX=45351 GN=v1g68409 PE=4 SV=1
A8DVT9	Predicted protein (Fragment) OS=Nematostella vectensis OX=45351 GN=v1g68429 PE=3 SV=1
A7S7J7	Predicted protein (Fragment) OS=Nematostella vectensis OX=45351 GN=v1g70014 PE=3 SV=1
A7S7J2	Predicted protein (Fragment) OS=Nematostella vectensis OX=45351 GN=v1g70038 PE=3 SV=1
A7RPK2	Predicted protein (Fragment) OS=Nematostella vectensis OX=45351 GN=v1g70665 PE=4 SV=1
A7T704	Predicted protein (Fragment) OS=Nematostella vectensis OX=45351 GN=v1g75104 PE=4 SV=1
A7TA39	Predicted protein (Fragment) OS=Nematostella vectensis OX=45351 GN=v1g77598 PE=4 SV=1
A7RES5	Predicted protein (Fragment) OS=Nematostella vectensis OX=45351 GN=v1g78945 PE=3 SV=1
A7REX0	Predicted protein (Fragment) OS=Nematostella vectensis OX=45351 GN=v1g79012 PE=4 SV=1
A7REQ1	Predicted protein (Fragment) OS=Nematostella vectensis OX=45351 GN=v1g79108 PE=4 SV=1
A7RF25	Predicted protein (Fragment) OS=Nematostella vectensis OX=45351 GN=v1g79120 PE=3 SV=1
A7REY8	Predicted protein (Fragment) OS=Nematostella vectensis OX=45351 GN=v1g79458 PE=3 SV=1
A7RFR9	Predicted protein (Fragment) OS=Nematostella vectensis OX=45351 GN=v1g79630 PE=3 SV=1
A7RFM8	Predicted protein (Fragment) OS=Nematostella vectensis OX=45351 GN=v1g79755 PE=3 SV=1
A7RFK1	Predicted protein (Fragment) OS=Nematostella vectensis OX=45351 GN=v1g79796 PE=3 SV=1
A7RFR1	Predicted protein (Fragment) OS=Nematostella vectensis OX=45351 GN=v1g79904 PE=3 SV=1
A7T5R6	Predicted protein (Fragment) OS=Nematostella vectensis OX=45351 GN=v1g8006 PE=4 SV=1
A7RFV3	Predicted protein (Fragment) OS=Nematostella vectensis OX=45351 GN=v1g80092 PE=3 SV=1
A7RFZ0	Predicted protein (Fragment) OS=Nematostella vectensis OX=45351 GN=v1g80250 PE=4 SV=1
A7RG56	Predicted protein (Fragment) OS=Nematostella vectensis OX=45351 GN=v1g80696 PE=3 SV=1
A7RGQ8	Predicted protein (Fragment) OS=Nematostella vectensis OX=45351 GN=v1g80734 PE=4 SV=1
A7RG70	Predicted protein (Fragment) OS=Nematostella vectensis OX=45351 GN=v1g80887 PE=4 SV=1
A7RJL2	Predicted protein (Fragment) OS=Nematostella vectensis OX=45351 GN=v1g8097 PE=3 SV=1
A7RGN6	Predicted protein (Fragment) OS=Nematostella vectensis OX=45351 GN=v1g80977 PE=4 SV=1
A7RPX8	Predicted protein (Fragment) OS=Nematostella vectensis OX=45351 GN=v1g8099 PE=3 SV=1
A7RG39	Predicted protein (Fragment) OS=Nematostella vectensis OX=45351 GN=v1g81002 PE=4 SV=1
A7SHX6	Predicted protein (Fragment) OS=Nematostella vectensis OX=45351 GN=v1g8103 PE=3 SV=1
A7RHG5	Predicted protein (Fragment) OS=Nematostella vectensis OX=45351 GN=v1g81245 PE=4 SV=1
A7RHA9	Predicted protein (Fragment) OS=Nematostella vectensis OX=45351 GN=v1g81294 PE=4 SV=1
A7SHX9	Predicted protein (Fragment) OS=Nematostella vectensis OX=45351 GN=v1g8134 PE=3 SV=1
A7RH27	Predicted protein (Fragment) OS=Nematostella vectensis OX=45351 GN=v1g81449 PE=4 SV=1
A7RH56	Predicted protein (Fragment) OS=Nematostella vectensis OX=45351 GN=v1g81470 PE=3 SV=1
A7RH74	Predicted protein (Fragment) OS=Nematostella vectensis OX=45351 GN=v1g81540 PE=4 SV=1
A7RHB0	Predicted protein (Fragment) OS=Nematostella vectensis OX=45351 GN=v1g81599 PE=4 SV=1
A7RH62	Predicted protein (Fragment) OS=Nematostella vectensis OX=45351 GN=v1g81756 PE=4 SV=1
A7RHW5	Predicted protein (Fragment) OS=Nematostella vectensis OX=45351 GN=v1g81828 PE=4 SV=1
A7RI54	Predicted protein (Fragment) OS=Nematostella vectensis OX=45351 GN=v1g81972 PE=4 SV=1
A7RHN6	Predicted protein (Fragment) OS=Nematostella vectensis OX=45351 GN=v1g82268 PE=4 SV=1
A7RIA9	Predicted protein (Fragment) OS=Nematostella vectensis OX=45351 GN=v1g82501 PE=4 SV=1
A7T4V9	Predicted protein (Fragment) OS=Nematostella vectensis OX=45351 GN=v1g8255 PE=4 SV=1
A7RIM4	Predicted protein (Fragment) OS=Nematostella vectensis OX=45351 GN=v1g82599 PE=4 SV=1
A7T1K9	Predicted protein (Fragment) OS=Nematostella vectensis OX=45351 GN=v1g8260 PE=3 SV=1
A7RIK0	Predicted protein (Fragment) OS=Nematostella vectensis OX=45351 GN=v1g82630 PE=3 SV=1
A7RIF5	Predicted protein (Fragment) OS=Nematostella vectensis OX=45351 GN=v1g82641 PE=3 SV=1
A7RIQ1	Predicted protein (Fragment) OS=Nematostella vectensis OX=45351 GN=v1g82725 PE=3 SV=1
A7RIC8	Predicted protein (Fragment) OS=Nematostella vectensis OX=45351 GN=v1g82777 PE=4 SV=1
A7RIK1	Predicted protein (Fragment) OS=Nematostella vectensis OX=45351 GN=v1g82804 PE=4 SV=1
A7RIZ3	Predicted protein (Fragment) OS=Nematostella vectensis OX=45351 GN=v1g83175 PE=3 SV=1
A7RIV7	Predicted protein (Fragment) OS=Nematostella vectensis OX=45351 GN=v1g83261 PE=3 SV=1
A7RJ61	Predicted protein (Fragment) OS=Nematostella vectensis OX=45351 GN=v1g83316 PE=3 SV=1
A7RIZ6	Predicted protein (Fragment) OS=Nematostella vectensis OX=45351 GN=v1g83511 PE=4 SV=1
A7RJ34	Predicted protein (Fragment) OS=Nematostella vectensis OX=45351 GN=v1g83542 PE=4 SV=1
A7SWF6	Predicted protein (Fragment) OS=Nematostella vectensis OX=45351 GN=v1g836 PE=3 SV=1
A7RJF9	Predicted protein (Fragment) OS=Nematostella vectensis OX=45351 GN=v1g83690 PE=4 SV=1
A7S6Z5	Predicted protein (Fragment) OS=Nematostella vectensis OX=45351 GN=v1g8391 PE=3 SV=1
A7RK54	Predicted protein (Fragment) OS=Nematostella vectensis OX=45351 GN=v1g84126 PE=3 SV=1
A7RKL4	Predicted protein (Fragment) OS=Nematostella vectensis OX=45351 GN=v1g85050 PE=3 SV=1
A7RKR5	Predicted protein (Fragment) OS=Nematostella vectensis OX=45351 GN=v1g85083 PE=3 SV=1
A7T4C2	Predicted protein (Fragment) OS=Nematostella vectensis OX=45351 GN=v1g8520 PE=4 SV=1
A7RKY2	Predicted protein (Fragment) OS=Nematostella vectensis OX=45351 GN=v1g85371 PE=4 SV=1
A7RMA2	Predicted protein (Fragment) OS=Nematostella vectensis OX=45351 GN=v1g86396 PE=4 SV=1
A7RM80	Predicted protein (Fragment) OS=Nematostella vectensis OX=45351 GN=v1g86595 PE=4 SV=1
A7RMK3	Predicted protein (Fragment) OS=Nematostella vectensis OX=45351 GN=v1g86795 PE=4 SV=1
A7RMP3	Predicted protein (Fragment) OS=Nematostella vectensis OX=45351 GN=v1g86996 PE=4 SV=1
A7RMZ6	Predicted protein (Fragment) OS=Nematostella vectensis OX=45351 GN=v1g87157 PE=4 SV=1
A7RMZ8	Predicted protein (Fragment) OS=Nematostella vectensis OX=45351 GN=v1g87270 PE=4 SV=1
A7RN50	Predicted protein (Fragment) OS=Nematostella vectensis OX=45351 GN=v1g87603 PE=4 SV=1
A7RNA9	Predicted protein (Fragment) OS=Nematostella vectensis OX=45351 GN=v1g87696 PE=4 SV=1
A7RNQ3	Predicted protein (Fragment) OS=Nematostella vectensis OX=45351 GN=v1g87802 PE=3 SV=1
A7RNQ6	Predicted protein (Fragment) OS=Nematostella vectensis OX=45351 GN=v1g87929 PE=3 SV=1
A7RNU5	Predicted protein (Fragment) OS=Nematostella vectensis OX=45351 GN=v1g88129 PE=4 SV=1
A7RNI7	Predicted protein (Fragment) OS=Nematostella vectensis OX=45351 GN=v1g88221 PE=4 SV=1
A7RP98	Predicted protein (Fragment) OS=Nematostella vectensis OX=45351 GN=v1g88707 PE=4 SV=1
A7RPB8	Predicted protein (Fragment) OS=Nematostella vectensis OX=45351 GN=v1g88915 PE=4 SV=1
A7RPP3	Predicted protein (Fragment) OS=Nematostella vectensis OX=45351 GN=v1g88977 PE=3 SV=1
A7RPZ1	Predicted protein (Fragment) OS=Nematostella vectensis OX=45351 GN=v1g89449 PE=4 SV=1
A7RQK4	Predicted protein (Fragment) OS=Nematostella vectensis OX=45351 GN=v1g89765 PE=4 SV=1
A7RQK5	Predicted protein (Fragment) OS=Nematostella vectensis OX=45351 GN=v1g89807 PE=4 SV=1
A7RR45	Predicted protein (Fragment) OS=Nematostella vectensis OX=45351 GN=v1g90403 PE=4 SV=1
A7T9D8	Predicted protein (Fragment) OS=Nematostella vectensis OX=45351 GN=v1g9062 PE=4 SV=1
A7RRK0	Predicted protein (Fragment) OS=Nematostella vectensis OX=45351 GN=v1g90754 PE=3 SV=1
A7RRI1	Predicted protein (Fragment) OS=Nematostella vectensis OX=45351 GN=v1g90876 PE=3 SV=1
A7RRQ3	Predicted protein (Fragment) OS=Nematostella vectensis OX=45351 GN=v1g91305 PE=4 SV=1
A7RS41	Predicted protein (Fragment) OS=Nematostella vectensis OX=45351 GN=v1g91324 PE=4 SV=1
A7T741	Predicted protein (Fragment) OS=Nematostella vectensis OX=45351 GN=v1g9145 PE=4 SV=1
A7RSJ6	Predicted protein (Fragment) OS=Nematostella vectensis OX=45351 GN=v1g91851 PE=3 SV=1
A7RSF4	Predicted protein (Fragment) OS=Nematostella vectensis OX=45351 GN=v1g91949 PE=3 SV=1
A7RSW5	Predicted protein (Fragment) OS=Nematostella vectensis OX=45351 GN=v1g92223 PE=4 SV=1
A7RSW0	Predicted protein (Fragment) OS=Nematostella vectensis OX=45351 GN=v1g92292 PE=4 SV=1
A7RT34	Predicted protein (Fragment) OS=Nematostella vectensis OX=45351 GN=v1g92319 PE=4 SV=1
A7TB37	Predicted protein (Fragment) OS=Nematostella vectensis OX=45351 GN=v1g9249 PE=4 SV=1
A7RT25	Predicted protein (Fragment) OS=Nematostella vectensis OX=45351 GN=v1g92641 PE=4 SV=1
A7RTF3	Predicted protein (Fragment) OS=Nematostella vectensis OX=45351 GN=v1g92763 PE=4 SV=1
A7RTE5	Predicted protein (Fragment) OS=Nematostella vectensis OX=45351 GN=v1g92827 PE=3 SV=1
A7RTU0	Predicted protein (Fragment) OS=Nematostella vectensis OX=45351 GN=v1g93093 PE=3 SV=1
A7RU68	Predicted protein (Fragment) OS=Nematostella vectensis OX=45351 GN=v1g93430 PE=4 SV=1
A7RU83	Predicted protein (Fragment) OS=Nematostella vectensis OX=45351 GN=v1g93668 PE=3 SV=1
A7RU62	Predicted protein (Fragment) OS=Nematostella vectensis OX=45351 GN=v1g93717 PE=3 SV=1
A7RUD6	Predicted protein (Fragment) OS=Nematostella vectensis OX=45351 GN=v1g93761 PE=4 SV=1
A7T9E3	Predicted protein (Fragment) OS=Nematostella vectensis OX=45351 GN=v1g9379 PE=4 SV=1
A7RUF3	Predicted protein (Fragment) OS=Nematostella vectensis OX=45351 GN=v1g93841 PE=4 SV=1
A7RUI5	Predicted protein (Fragment) OS=Nematostella vectensis OX=45351 GN=v1g93878 PE=4 SV=1
A7RUG0	Predicted protein (Fragment) OS=Nematostella vectensis OX=45351 GN=v1g93924 PE=3 SV=1
A7RUW5	Predicted protein (Fragment) OS=Nematostella vectensis OX=45351 GN=v1g94089 PE=4 SV=1
A7RUS0	Predicted protein (Fragment) OS=Nematostella vectensis OX=45351 GN=v1g94204 PE=4 SV=1
A7RUS7	Predicted protein (Fragment) OS=Nematostella vectensis OX=45351 GN=v1g94276 PE=4 SV=1
A7RVP9	Predicted protein (Fragment) OS=Nematostella vectensis OX=45351 GN=v1g94939 PE=4 SV=1
A7RVN0	Predicted protein (Fragment) OS=Nematostella vectensis OX=45351 GN=v1g95031 PE=4 SV=1
A7RVR0	Predicted protein (Fragment) OS=Nematostella vectensis OX=45351 GN=v1g95035 PE=4 SV=1
A7SGF8	Predicted protein (Fragment) OS=Nematostella vectensis OX=45351 GN=v1g957 PE=4 SV=1
A7RWI4	Predicted protein (Fragment) OS=Nematostella vectensis OX=45351 GN=v1g96060 PE=4 SV=1
A7RWS5	Predicted protein (Fragment) OS=Nematostella vectensis OX=45351 GN=v1g96329 PE=4 SV=1
A7RX75	Predicted protein (Fragment) OS=Nematostella vectensis OX=45351 GN=v1g96414 PE=4 SV=1
A7RXA3	Predicted protein (Fragment) OS=Nematostella vectensis OX=45351 GN=v1g96464 PE=4 SV=1
A7RXY0	Predicted protein (Fragment) OS=Nematostella vectensis OX=45351 GN=v1g97271 PE=4 SV=1
A7RY51	Predicted protein (Fragment) OS=Nematostella vectensis OX=45351 GN=v1g97340 PE=3 SV=1
A7RY68	Predicted protein (Fragment) OS=Nematostella vectensis OX=45351 GN=v1g97640 PE=4 SV=1
A7RYC2	Predicted protein (Fragment) OS=Nematostella vectensis OX=45351 GN=v1g97774 PE=3 SV=1
A7RYS1	Predicted protein (Fragment) OS=Nematostella vectensis OX=45351 GN=v1g98056 PE=3 SV=1
A7RYV6	Predicted protein (Fragment) OS=Nematostella vectensis OX=45351 GN=v1g98111 PE=4 SV=1
A7RYX9	Predicted protein (Fragment) OS=Nematostella vectensis OX=45351 GN=v1g98246 PE=4 SV=1
A7RZ13	Predicted protein (Fragment) OS=Nematostella vectensis OX=45351 GN=v1g98301 PE=3 SV=1
A7RYY0	Predicted protein (Fragment) OS=Nematostella vectensis OX=45351 GN=v1g98336 PE=3 SV=1
A7RZ14	Predicted protein (Fragment) OS=Nematostella vectensis OX=45351 GN=v1g98373 PE=3 SV=1
A7T296	Predicted protein (Fragment) OS=Nematostella vectensis OX=45351 GN=v1g986 PE=4 SV=1
A7RZA7	Predicted protein (Fragment) OS=Nematostella vectensis OX=45351 GN=v1g98739 PE=4 SV=1
A7RZG6	Predicted protein (Fragment) OS=Nematostella vectensis OX=45351 GN=v1g98802 PE=4 SV=1
A7RZI7	Predicted protein (Fragment) OS=Nematostella vectensis OX=45351 GN=v1g98829 PE=3 SV=1
A7RZY3	Predicted protein (Fragment) OS=Nematostella vectensis OX=45351 GN=v1g99081 PE=4 SV=1
A7RZU1	Predicted protein (Fragment) OS=Nematostella vectensis OX=45351 GN=v1g99196 PE=3 SV=1
A7S062	Predicted protein (Fragment) OS=Nematostella vectensis OX=45351 GN=v1g99547 PE=3 SV=1
A8DVR7	Predicted protein (Fragment) OS=Nematostella vectensis OX=45351 GN=v1g9969 PE=3 SV=1
A7S0C7	Predicted protein (Fragment) OS=Nematostella vectensis OX=45351 GN=v1g99757 PE=4 SV=1
A7S0B4	Predicted protein (Fragment) OS=Nematostella vectensis OX=45351 GN=v1g99837 PE=4 SV=1
A7S0C6	Predicted protein (Fragment) OS=Nematostella vectensis OX=45351 GN=v1g99855 PE=4 SV=1
A7S0I1	Predicted protein (Fragment) OS=Nematostella vectensis OX=45351 GN=v1g99928 PE=3 SV=1
A7RJ82	Predicted protein OS=Nematostella vectensis OX=45351 GN=calcineurin B PE=2 SV=1
A7S115	Predicted protein OS=Nematostella vectensis OX=45351 GN=v1g100297 PE=4 SV=1
A7S0Z8	Predicted protein OS=Nematostella vectensis OX=45351 GN=v1g100342 PE=4 SV=1
A7S107	Predicted protein OS=Nematostella vectensis OX=45351 GN=v1g100359 PE=3 SV=1
A7S179	Predicted protein OS=Nematostella vectensis OX=45351 GN=v1g100407 PE=4 SV=1
A7S129	Predicted protein OS=Nematostella vectensis OX=45351 GN=v1g100430 PE=3 SV=1
A7S197	Predicted protein OS=Nematostella vectensis OX=45351 GN=v1g100529 PE=4 SV=1
A7S2D9	Predicted protein OS=Nematostella vectensis OX=45351 GN=v1g101975 PE=4 SV=1
A7S2T7	Predicted protein OS=Nematostella vectensis OX=45351 GN=v1g102295 PE=4 SV=1
A7S322	Predicted protein OS=Nematostella vectensis OX=45351 GN=v1g102600 PE=3 SV=1
A7S350	Predicted protein OS=Nematostella vectensis OX=45351 GN=v1g102625 PE=4 SV=1
A7S397	Predicted protein OS=Nematostella vectensis OX=45351 GN=v1g102755 PE=4 SV=1
A7S370	Predicted protein OS=Nematostella vectensis OX=45351 GN=v1g102934 PE=3 SV=1
A7S3C4	Predicted protein OS=Nematostella vectensis OX=45351 GN=v1g103092 PE=4 SV=1
A7S3D9	Predicted protein OS=Nematostella vectensis OX=45351 GN=v1g103120 PE=3 SV=1
A7S3X4	Predicted protein OS=Nematostella vectensis OX=45351 GN=v1g103525 PE=3 SV=1
A7S423	Predicted protein OS=Nematostella vectensis OX=45351 GN=v1g103835 PE=3 SV=1
A7S469	Predicted protein OS=Nematostella vectensis OX=45351 GN=v1g104042 PE=3 SV=1
A7S4A6	Predicted protein OS=Nematostella vectensis OX=45351 GN=v1g104066 PE=4 SV=1
A7S4S2	Predicted protein OS=Nematostella vectensis OX=45351 GN=v1g104509 PE=3 SV=1
A7S5D9	Predicted protein OS=Nematostella vectensis OX=45351 GN=v1g105379 PE=4 SV=1
A7S5T6	Predicted protein OS=Nematostella vectensis OX=45351 GN=v1g105663 PE=3 SV=1
A7S5Z1	Predicted protein OS=Nematostella vectensis OX=45351 GN=v1g105798 PE=3 SV=1
A7S688	Predicted protein OS=Nematostella vectensis OX=45351 GN=v1g106088 PE=4 SV=1
A7S681	Predicted protein OS=Nematostella vectensis OX=45351 GN=v1g106239 PE=4 SV=1
A7S6E0	Predicted protein OS=Nematostella vectensis OX=45351 GN=v1g106290 PE=3 SV=1
A7S712	Predicted protein OS=Nematostella vectensis OX=45351 GN=v1g106870 PE=4 SV=1
A7S6Y9	Predicted protein OS=Nematostella vectensis OX=45351 GN=v1g107007 PE=3 SV=1
A7S746	Predicted protein OS=Nematostella vectensis OX=45351 GN=v1g107256 PE=3 SV=1
A7S773	Predicted protein OS=Nematostella vectensis OX=45351 GN=v1g107265 PE=3 SV=1
A7S877	Predicted protein OS=Nematostella vectensis OX=45351 GN=v1g108573 PE=3 SV=1
A7S8D4	Predicted protein OS=Nematostella vectensis OX=45351 GN=v1g108621 PE=4 SV=1
A7S9G3	Predicted protein OS=Nematostella vectensis OX=45351 GN=v1g109978 PE=3 SV=1
A7S9J0	Predicted protein OS=Nematostella vectensis OX=45351 GN=v1g110149 PE=4 SV=1
A7SA39	Predicted protein OS=Nematostella vectensis OX=45351 GN=v1g110661 PE=4 SV=1
A7SAJ7	Predicted protein OS=Nematostella vectensis OX=45351 GN=v1g111058 PE=3 SV=1
A7SBS2	Predicted protein OS=Nematostella vectensis OX=45351 GN=v1g112507 PE=4 SV=1
A7SC99	Predicted protein OS=Nematostella vectensis OX=45351 GN=v1g113088 PE=4 SV=1
A7SCI4	Predicted protein OS=Nematostella vectensis OX=45351 GN=v1g113255 PE=4 SV=1
A7SCN9	Predicted protein OS=Nematostella vectensis OX=45351 GN=v1g113443 PE=3 SV=1
A7SCT4	Predicted protein OS=Nematostella vectensis OX=45351 GN=v1g113623 PE=3 SV=1
A7SD57	Predicted protein OS=Nematostella vectensis OX=45351 GN=v1g113876 PE=3 SV=1
A7SD33	Predicted protein OS=Nematostella vectensis OX=45351 GN=v1g113937 PE=4 SV=1
A7SDI6	Predicted protein OS=Nematostella vectensis OX=45351 GN=v1g114223 PE=4 SV=1
A7SDJ5	Predicted protein OS=Nematostella vectensis OX=45351 GN=v1g114289 PE=4 SV=1
A7SDX1	Predicted protein OS=Nematostella vectensis OX=45351 GN=v1g114632 PE=4 SV=1
A7SE54	Predicted protein OS=Nematostella vectensis OX=45351 GN=v1g114899 PE=4 SV=1
A7SEA8	Predicted protein OS=Nematostella vectensis OX=45351 GN=v1g115016 PE=4 SV=1
A7SE67	Predicted protein OS=Nematostella vectensis OX=45351 GN=v1g115087 PE=3 SV=1
A7SEC3	Predicted protein OS=Nematostella vectensis OX=45351 GN=v1g115225 PE=4 SV=1
A7SEP0	Predicted protein OS=Nematostella vectensis OX=45351 GN=v1g115538 PE=4 SV=1
A7SHE8	Predicted protein OS=Nematostella vectensis OX=45351 GN=v1g118368 PE=4 SV=1
A7SHB8	Predicted protein OS=Nematostella vectensis OX=45351 GN=v1g118418 PE=3 SV=1
A7SHV1	Predicted protein OS=Nematostella vectensis OX=45351 GN=v1g118966 PE=3 SV=1
A7SJ85	Predicted protein OS=Nematostella vectensis OX=45351 GN=v1g120257 PE=3 SV=1
A7SJI9	Predicted protein OS=Nematostella vectensis OX=45351 GN=v1g120584 PE=3 SV=1
A7SKW7	Predicted protein OS=Nematostella vectensis OX=45351 GN=v1g122048 PE=3 SV=1
A7SMG7	Predicted protein OS=Nematostella vectensis OX=45351 GN=v1g123672 PE=3 SV=1
A7SMR4	Predicted protein OS=Nematostella vectensis OX=45351 GN=v1g124011 PE=4 SV=1
A7SNF5	Predicted protein OS=Nematostella vectensis OX=45351 GN=v1g124772 PE=4 SV=1
A7SNG6	Predicted protein OS=Nematostella vectensis OX=45351 GN=v1g124869 PE=3 SV=1
A7SNP7	Predicted protein OS=Nematostella vectensis OX=45351 GN=v1g125111 PE=3 SV=1
A7SNS0	Predicted protein OS=Nematostella vectensis OX=45351 GN=v1g125185 PE=3 SV=1
A7SNZ1	Predicted protein OS=Nematostella vectensis OX=45351 GN=v1g125383 PE=3 SV=1
A7SP68	Predicted protein OS=Nematostella vectensis OX=45351 GN=v1g125775 PE=4 SV=1
A7SPH7	Predicted protein OS=Nematostella vectensis OX=45351 GN=v1g126053 PE=4 SV=1
A7SPP2	Predicted protein OS=Nematostella vectensis OX=45351 GN=v1g126198 PE=3 SV=1
A7SPU8	Predicted protein OS=Nematostella vectensis OX=45351 GN=v1g126384 PE=4 SV=1
A7SQ21	Predicted protein OS=Nematostella vectensis OX=45351 GN=v1g127073 PE=3 SV=1
A7SR99	Predicted protein OS=Nematostella vectensis OX=45351 GN=v1g128552 PE=4 SV=1
A7SR94	Predicted protein OS=Nematostella vectensis OX=45351 GN=v1g128647 PE=4 SV=1
A7SRX4	Predicted protein OS=Nematostella vectensis OX=45351 GN=v1g129196 PE=4 SV=1
A7SRY9	Predicted protein OS=Nematostella vectensis OX=45351 GN=v1g129274 PE=3 SV=1
A7SS14	Predicted protein OS=Nematostella vectensis OX=45351 GN=v1g129318 PE=4 SV=1
A7SSN1	Predicted protein OS=Nematostella vectensis OX=45351 GN=v1g130157 PE=3 SV=1
A7ST34	Predicted protein OS=Nematostella vectensis OX=45351 GN=v1g130660 PE=4 SV=1
A7ST61	Predicted protein OS=Nematostella vectensis OX=45351 GN=v1g130720 PE=4 SV=1
A7STK5	Predicted protein OS=Nematostella vectensis OX=45351 GN=v1g131227 PE=4 SV=1
A7SU84	Predicted protein OS=Nematostella vectensis OX=45351 GN=v1g131971 PE=4 SV=1
A7SUC7	Predicted protein OS=Nematostella vectensis OX=45351 GN=v1g132153 PE=4 SV=1
A7SUJ8	Predicted protein OS=Nematostella vectensis OX=45351 GN=v1g132315 PE=4 SV=1
A7SUK0	Predicted protein OS=Nematostella vectensis OX=45351 GN=v1g132347 PE=3 SV=1
A7SVC3	Predicted protein OS=Nematostella vectensis OX=45351 GN=v1g133978 PE=3 SV=1
A7SVZ0	Predicted protein OS=Nematostella vectensis OX=45351 GN=v1g134582 PE=4 SV=1
A7SW03	Predicted protein OS=Nematostella vectensis OX=45351 GN=v1g134613 PE=4 SV=1
A7SWJ5	Predicted protein OS=Nematostella vectensis OX=45351 GN=v1g135342 PE=3 SV=1
A7SWS1	Predicted protein OS=Nematostella vectensis OX=45351 GN=v1g135670 PE=3 SV=1
A7SXI1	Predicted protein OS=Nematostella vectensis OX=45351 GN=v1g136737 PE=3 SV=1
A7SXK7	Predicted protein OS=Nematostella vectensis OX=45351 GN=v1g136849 PE=4 SV=1
A7S6Q0	Predicted protein OS=Nematostella vectensis OX=45351 GN=v1g137658 PE=3 SV=1
A7SYA8	Predicted protein OS=Nematostella vectensis OX=45351 GN=v1g137721 PE=4 SV=1
A7SYE8	Predicted protein OS=Nematostella vectensis OX=45351 GN=v1g137810 PE=3 SV=1
A7SZQ6	Predicted protein OS=Nematostella vectensis OX=45351 GN=v1g139364 PE=4 SV=1
A7SZV1	Predicted protein OS=Nematostella vectensis OX=45351 GN=v1g139511 PE=3 SV=1
A7T002	Predicted protein OS=Nematostella vectensis OX=45351 GN=v1g139747 PE=4 SV=1
A7T0E1	Predicted protein OS=Nematostella vectensis OX=45351 GN=v1g140278 PE=3 SV=1
A7T0H4	Predicted protein OS=Nematostella vectensis OX=45351 GN=v1g140391 PE=3 SV=1
A7T0V7	Predicted protein OS=Nematostella vectensis OX=45351 GN=v1g140859 PE=4 SV=1
A7T170	Predicted protein OS=Nematostella vectensis OX=45351 GN=v1g141408 PE=4 SV=1
A7T1I7	Predicted protein OS=Nematostella vectensis OX=45351 GN=v1g141804 PE=4 SV=1
A7T273	Predicted protein OS=Nematostella vectensis OX=45351 GN=v1g142804 PE=3 SV=1
A7T279	Predicted protein OS=Nematostella vectensis OX=45351 GN=v1g142815 PE=4 SV=1
A7T2T6	Predicted protein OS=Nematostella vectensis OX=45351 GN=v1g143475 PE=4 SV=1
A7T767	Predicted protein OS=Nematostella vectensis OX=45351 GN=v1g148601 PE=3 SV=1
A7T8H6	Predicted protein OS=Nematostella vectensis OX=45351 GN=v1g150226 PE=4 SV=1
A7T8I0	Predicted protein OS=Nematostella vectensis OX=45351 GN=v1g150238 PE=4 SV=1
A7TAS3	Predicted protein OS=Nematostella vectensis OX=45351 GN=v1g152707 PE=4 SV=1
A7REX4	Predicted protein OS=Nematostella vectensis OX=45351 GN=v1g157740 PE=4 SV=1
A7REX7	Predicted protein OS=Nematostella vectensis OX=45351 GN=v1g157748 PE=3 SV=1
A7RF27	Predicted protein OS=Nematostella vectensis OX=45351 GN=v1g157790 PE=4 SV=1
A7RFN2	Predicted protein OS=Nematostella vectensis OX=45351 GN=v1g157973 PE=3 SV=1
A7RFX1	Predicted protein OS=Nematostella vectensis OX=45351 GN=v1g158071 PE=3 SV=1
A7RFY0	Predicted protein OS=Nematostella vectensis OX=45351 GN=v1g158093 PE=4 SV=1
A7RG79	Predicted protein OS=Nematostella vectensis OX=45351 GN=v1g158216 PE=4 SV=1
A7RGK1	Predicted protein OS=Nematostella vectensis OX=45351 GN=v1g158359 PE=4 SV=1
A7RGP8	Predicted protein OS=Nematostella vectensis OX=45351 GN=v1g158412 PE=4 SV=1
A7RGR4	Predicted protein OS=Nematostella vectensis OX=45351 GN=v1g158438 PE=4 SV=1
A7RGV0	Predicted protein OS=Nematostella vectensis OX=45351 GN=v1g158484 PE=4 SV=1
A7RH22	Predicted protein OS=Nematostella vectensis OX=45351 GN=v1g158557 PE=3 SV=1
A7RH36	Predicted protein OS=Nematostella vectensis OX=45351 GN=v1g158576 PE=3 SV=1
A7RH51	Predicted protein OS=Nematostella vectensis OX=45351 GN=v1g158601 PE=3 SV=1
A7RHA6	Predicted protein OS=Nematostella vectensis OX=45351 GN=v1g158666 PE=3 SV=1
A7RHT1	Predicted protein OS=Nematostella vectensis OX=45351 GN=v1g158808 PE=4 SV=1
A7RI22	Predicted protein OS=Nematostella vectensis OX=45351 GN=v1g158927 PE=3 SV=1
A7RI29	Predicted protein OS=Nematostella vectensis OX=45351 GN=v1g158934 PE=3 SV=1
A7RID7	Predicted protein OS=Nematostella vectensis OX=45351 GN=v1g159077 PE=3 SV=1
A7RIE1	Predicted protein OS=Nematostella vectensis OX=45351 GN=v1g159083 PE=3 SV=1
A7RJ25	Predicted protein OS=Nematostella vectensis OX=45351 GN=v1g159364 PE=3 SV=1
A7RJ93	Predicted protein OS=Nematostella vectensis OX=45351 GN=v1g159424 PE=3 SV=1
A7RJV0	Predicted protein OS=Nematostella vectensis OX=45351 GN=v1g159589 PE=3 SV=1
A7RKB1	Predicted protein OS=Nematostella vectensis OX=45351 GN=v1g159727 PE=4 SV=1
A7RKC0	Predicted protein OS=Nematostella vectensis OX=45351 GN=v1g159736 PE=3 SV=1
A7RKK0	Predicted protein OS=Nematostella vectensis OX=45351 GN=v1g159788 PE=3 SV=1
A7RKY4	Predicted protein OS=Nematostella vectensis OX=45351 GN=v1g159899 PE=3 SV=1
A7RL06	Predicted protein OS=Nematostella vectensis OX=45351 GN=v1g159915 PE=3 SV=1
A7RL15	Predicted protein OS=Nematostella vectensis OX=45351 GN=v1g159935 PE=4 SV=1
A7RLY5	Predicted protein OS=Nematostella vectensis OX=45351 GN=v1g160314 PE=3 SV=1
A7RM01	Predicted protein OS=Nematostella vectensis OX=45351 GN=v1g160342 PE=4 SV=1
A7RM62	Predicted protein OS=Nematostella vectensis OX=45351 GN=v1g160405 PE=3 SV=1
A7RM97	Predicted protein OS=Nematostella vectensis OX=45351 GN=v1g160446 PE=3 SV=1
A7RMA6	Predicted protein OS=Nematostella vectensis OX=45351 GN=v1g160457 PE=4 SV=1
A7RMQ1	Predicted protein OS=Nematostella vectensis OX=45351 GN=v1g160631 PE=4 SV=1
A7RMQ2	Predicted protein OS=Nematostella vectensis OX=45351 GN=v1g160634 PE=4 SV=1
A7RMS6	Predicted protein OS=Nematostella vectensis OX=45351 GN=v1g160673 PE=4 SV=1
A7RMZ3	Predicted protein OS=Nematostella vectensis OX=45351 GN=v1g160743 PE=3 SV=1
A7RMZ4	Predicted protein OS=Nematostella vectensis OX=45351 GN=v1g160746 PE=3 SV=1
A7RN85	Predicted protein OS=Nematostella vectensis OX=45351 GN=v1g160849 PE=3 SV=1
A7RPB6	Predicted protein OS=Nematostella vectensis OX=45351 GN=v1g161193 PE=4 SV=1
A7RPJ8	Predicted protein OS=Nematostella vectensis OX=45351 GN=v1g161278 PE=4 SV=1
A7RPM5	Predicted protein OS=Nematostella vectensis OX=45351 GN=v1g161307 PE=4 SV=1
A7RPQ7	Predicted protein OS=Nematostella vectensis OX=45351 GN=v1g161336 PE=3 SV=1
A7RR66	Predicted protein OS=Nematostella vectensis OX=45351 GN=v1g161775 PE=4 SV=1
A7RRK5	Predicted protein OS=Nematostella vectensis OX=45351 GN=v1g161920 PE=3 SV=1
A7RRZ1	Predicted protein OS=Nematostella vectensis OX=45351 GN=v1g162091 PE=4 SV=1
A7RSB9	Predicted protein OS=Nematostella vectensis OX=45351 GN=v1g162182 PE=3 SV=1
A7RSG9	Predicted protein OS=Nematostella vectensis OX=45351 GN=v1g162231 PE=4 SV=1
A7RT76	Predicted protein OS=Nematostella vectensis OX=45351 GN=v1g162401 PE=4 SV=1
A7RT86	Predicted protein OS=Nematostella vectensis OX=45351 GN=v1g162417 PE=4 SV=1
A7RTJ4	Predicted protein OS=Nematostella vectensis OX=45351 GN=v1g162513 PE=3 SV=1
A7RTU8	Predicted protein OS=Nematostella vectensis OX=45351 GN=v1g162633 PE=4 SV=1
A7RTW3	Predicted protein OS=Nematostella vectensis OX=45351 GN=v1g162648 PE=3 SV=1
A7RTW9	Predicted protein OS=Nematostella vectensis OX=45351 GN=v1g162659 PE=4 SV=1
A7RUT5	Predicted protein OS=Nematostella vectensis OX=45351 GN=v1g162962 PE=3 SV=1
A7RUX1	Predicted protein OS=Nematostella vectensis OX=45351 GN=v1g163008 PE=4 SV=1
A7RVA9	Predicted protein OS=Nematostella vectensis OX=45351 GN=v1g163145 PE=3 SV=1
A7RVB3	Predicted protein OS=Nematostella vectensis OX=45351 GN=v1g163150 PE=4 SV=1
A7RVG5	Predicted protein OS=Nematostella vectensis OX=45351 GN=v1g163167 PE=4 SV=1
A7RVM2	Predicted protein OS=Nematostella vectensis OX=45351 GN=v1g163220 PE=3 SV=1
A7RVP4	Predicted protein OS=Nematostella vectensis OX=45351 GN=v1g163252 PE=3 SV=1
A7RW66	Predicted protein OS=Nematostella vectensis OX=45351 GN=v1g163430 PE=3 SV=1
A7RW70	Predicted protein OS=Nematostella vectensis OX=45351 GN=v1g163440 PE=3 SV=1
A7RWV1	Predicted protein OS=Nematostella vectensis OX=45351 GN=v1g163628 PE=4 SV=1
A7RX19	Predicted protein OS=Nematostella vectensis OX=45351 GN=v1g163663 PE=4 SV=1
A7RXI1	Predicted protein OS=Nematostella vectensis OX=45351 GN=v1g163860 PE=4 SV=1
A7RXK5	Predicted protein OS=Nematostella vectensis OX=45351 GN=v1g163878 PE=4 SV=1
A7RXZ9	Predicted protein OS=Nematostella vectensis OX=45351 GN=v1g164017 PE=4 SV=1
A7RY78	Predicted protein OS=Nematostella vectensis OX=45351 GN=v1g164094 PE=3 SV=1
A7RZ03	Predicted protein OS=Nematostella vectensis OX=45351 GN=v1g164353 PE=3 SV=1
A7RZ15	Predicted protein OS=Nematostella vectensis OX=45351 GN=v1g164373 PE=3 SV=1
A7RZB4	Predicted protein OS=Nematostella vectensis OX=45351 GN=v1g164461 PE=4 SV=1
A7S038	Predicted protein OS=Nematostella vectensis OX=45351 GN=v1g164778 PE=4 SV=1
A7S0E4	Predicted protein OS=Nematostella vectensis OX=45351 GN=v1g164893 PE=3 SV=1
A7S0I4	Predicted protein OS=Nematostella vectensis OX=45351 GN=v1g164939 PE=3 SV=1
A7S0M9	Predicted protein OS=Nematostella vectensis OX=45351 GN=v1g164983 PE=4 SV=1
A7S0N6	Predicted protein OS=Nematostella vectensis OX=45351 GN=v1g164994 PE=4 SV=1
A7S0P8	Predicted protein OS=Nematostella vectensis OX=45351 GN=v1g165005 PE=3 SV=1
A7S1K4	Predicted protein OS=Nematostella vectensis OX=45351 GN=v1g165338 PE=3 SV=1
A7S1M1	Predicted protein OS=Nematostella vectensis OX=45351 GN=v1g165363 PE=4 SV=1
A7S252	Predicted protein OS=Nematostella vectensis OX=45351 GN=v1g165473 PE=3 SV=1
A7S2I7	Predicted protein OS=Nematostella vectensis OX=45351 GN=v1g165644 PE=3 SV=1
A7S2I8	Predicted protein OS=Nematostella vectensis OX=45351 GN=v1g165649 PE=3 SV=1
A7S2J5	Predicted protein OS=Nematostella vectensis OX=45351 GN=v1g165664 PE=3 SV=1
A7S2K4	Predicted protein OS=Nematostella vectensis OX=45351 GN=v1g165676 PE=4 SV=1
A7S2L5	Predicted protein OS=Nematostella vectensis OX=45351 GN=v1g165696 PE=3 SV=1
A7S2W2	Predicted protein OS=Nematostella vectensis OX=45351 GN=v1g165764 PE=3 SV=1
A7S392	Predicted protein OS=Nematostella vectensis OX=45351 GN=v1g165897 PE=3 SV=1
A7S3A4	Predicted protein OS=Nematostella vectensis OX=45351 GN=v1g165919 PE=4 SV=1
A7S3B3	Predicted protein OS=Nematostella vectensis OX=45351 GN=v1g165941 PE=3 SV=1
A7S3F4	Predicted protein OS=Nematostella vectensis OX=45351 GN=v1g165983 PE=4 SV=1
A7S3V6	Predicted protein OS=Nematostella vectensis OX=45351 GN=v1g166091 PE=3 SV=1
A7S438	Predicted protein OS=Nematostella vectensis OX=45351 GN=v1g166198 PE=4 SV=1
A7S4K0	Predicted protein OS=Nematostella vectensis OX=45351 GN=v1g166341 PE=4 SV=1
A7S523	Predicted protein OS=Nematostella vectensis OX=45351 GN=v1g166542 PE=3 SV=1
A7S549	Predicted protein OS=Nematostella vectensis OX=45351 GN=v1g166581 PE=4 SV=1
A7S5I6	Predicted protein OS=Nematostella vectensis OX=45351 GN=v1g166681 PE=4 SV=1
A7S5W0	Predicted protein OS=Nematostella vectensis OX=45351 GN=v1g166808 PE=4 SV=1
A7S6F6	Predicted protein OS=Nematostella vectensis OX=45351 GN=v1g167042 PE=3 SV=1
A7S6T0	Predicted protein OS=Nematostella vectensis OX=45351 GN=v1g167183 PE=3 SV=1
A7S703	Predicted protein OS=Nematostella vectensis OX=45351 GN=v1g167234 PE=4 SV=1
A7S778	Predicted protein OS=Nematostella vectensis OX=45351 GN=v1g167304 PE=3 SV=1
A7S7E1	Predicted protein OS=Nematostella vectensis OX=45351 GN=v1g167354 PE=4 SV=1
A7S7R7	Predicted protein OS=Nematostella vectensis OX=45351 GN=v1g167466 PE=4 SV=1
A7S7T0	Predicted protein OS=Nematostella vectensis OX=45351 GN=v1g167483 PE=4 SV=1
A7S806	Predicted protein OS=Nematostella vectensis OX=45351 GN=v1g167582 PE=4 SV=1
A7S880	Predicted protein OS=Nematostella vectensis OX=45351 GN=v1g167625 PE=4 SV=1
A7S8D2	Predicted protein OS=Nematostella vectensis OX=45351 GN=v1g167661 PE=3 SV=1
A7S8I4	Predicted protein OS=Nematostella vectensis OX=45351 GN=v1g167750 PE=3 SV=1
A7S9A5	Predicted protein OS=Nematostella vectensis OX=45351 GN=v1g167953 PE=3 SV=1
A7S9X6	Predicted protein OS=Nematostella vectensis OX=45351 GN=v1g168144 PE=3 SV=1
A7S9Y6	Predicted protein OS=Nematostella vectensis OX=45351 GN=v1g168160 PE=3 SV=1
A7SAH1	Predicted protein OS=Nematostella vectensis OX=45351 GN=v1g168356 PE=3 SV=1
A7SBT1	Predicted protein OS=Nematostella vectensis OX=45351 GN=v1g168735 PE=3 SV=1
A7SD67	Predicted protein OS=Nematostella vectensis OX=45351 GN=v1g169195 PE=3 SV=1
A7SDH8	Predicted protein OS=Nematostella vectensis OX=45351 GN=v1g169332 PE=3 SV=1
A7SDK8	Predicted protein OS=Nematostella vectensis OX=45351 GN=v1g169360 PE=4 SV=1
A7SEB1	Predicted protein OS=Nematostella vectensis OX=45351 GN=v1g169611 PE=3 SV=1
A7SEC4	Predicted protein OS=Nematostella vectensis OX=45351 GN=v1g169627 PE=3 SV=1
A7SES7	Predicted protein OS=Nematostella vectensis OX=45351 GN=v1g169781 PE=4 SV=1
A7SFE8	Predicted protein OS=Nematostella vectensis OX=45351 GN=v1g170004 PE=3 SV=1
A7SGC0	Predicted protein OS=Nematostella vectensis OX=45351 GN=v1g170326 PE=4 SV=1
A7SGD1	Predicted protein OS=Nematostella vectensis OX=45351 GN=v1g170348 PE=3 SV=1
A7SGF7	Predicted protein OS=Nematostella vectensis OX=45351 GN=v1g170371 PE=4 SV=1
A7SGM5	Predicted protein OS=Nematostella vectensis OX=45351 GN=v1g170435 PE=3 SV=1
A7SGM6	Predicted protein OS=Nematostella vectensis OX=45351 GN=v1g170437 PE=3 SV=1
A7SGX1	Predicted protein OS=Nematostella vectensis OX=45351 GN=v1g170524 PE=4 SV=1
A7SGX2	Predicted protein OS=Nematostella vectensis OX=45351 GN=v1g170524 PE=4 SV=1
A7SH61	Predicted protein OS=Nematostella vectensis OX=45351 GN=v1g170611 PE=3 SV=1
A7SHH6	Predicted protein OS=Nematostella vectensis OX=45351 GN=v1g170702 PE=3 SV=1
A7SHS9	Predicted protein OS=Nematostella vectensis OX=45351 GN=v1g170763 PE=3 SV=1
A7SI89	Predicted protein OS=Nematostella vectensis OX=45351 GN=v1g170922 PE=4 SV=1
A7SIC3	Predicted protein OS=Nematostella vectensis OX=45351 GN=v1g170937 PE=4 SV=1
A7SIH5	Predicted protein OS=Nematostella vectensis OX=45351 GN=v1g170954 PE=4 SV=1
A7SIR9	Predicted protein OS=Nematostella vectensis OX=45351 GN=v1g171009 PE=3 SV=1
A7SIZ0	Predicted protein OS=Nematostella vectensis OX=45351 GN=v1g171064 PE=3 SV=1
A7SJE6	Predicted protein OS=Nematostella vectensis OX=45351 GN=v1g171208 PE=3 SV=1
A7SJH7	Predicted protein OS=Nematostella vectensis OX=45351 GN=v1g171246 PE=4 SV=1
A7SJJ2	Predicted protein OS=Nematostella vectensis OX=45351 GN=v1g171267 PE=4 SV=1
A7SJR5	Predicted protein OS=Nematostella vectensis OX=45351 GN=v1g171362 PE=3 SV=1
A7SK51	Predicted protein OS=Nematostella vectensis OX=45351 GN=v1g171497 PE=3 SV=1
A7SKK4	Predicted protein OS=Nematostella vectensis OX=45351 GN=v1g171613 PE=4 SV=1
A7SKM1	Predicted protein OS=Nematostella vectensis OX=45351 GN=v1g171629 PE=3 SV=1
A7SL40	Predicted protein OS=Nematostella vectensis OX=45351 GN=v1g171781 PE=4 SV=1
A7SLB5	Predicted protein OS=Nematostella vectensis OX=45351 GN=v1g171824 PE=4 SV=1
A7SLG8	Predicted protein OS=Nematostella vectensis OX=45351 GN=v1g171873 PE=4 SV=1
A7SLQ1	Predicted protein OS=Nematostella vectensis OX=45351 GN=v1g171940 PE=3 SV=1
A7SLW2	Predicted protein OS=Nematostella vectensis OX=45351 GN=v1g171977 PE=3 SV=1
A7SM46	Predicted protein OS=Nematostella vectensis OX=45351 GN=v1g172038 PE=3 SV=1
A7SMB0	Predicted protein OS=Nematostella vectensis OX=45351 GN=v1g172093 PE=4 SV=1
A7SMN3	Predicted protein OS=Nematostella vectensis OX=45351 GN=v1g172167 PE=4 SV=1
A7SMN7	Predicted protein OS=Nematostella vectensis OX=45351 GN=v1g172175 PE=4 SV=1
A7SMW5	Predicted protein OS=Nematostella vectensis OX=45351 GN=v1g172247 PE=3 SV=1
A7SN77	Predicted protein OS=Nematostella vectensis OX=45351 GN=v1g172396 PE=3 SV=1
A7SNR4	Predicted protein OS=Nematostella vectensis OX=45351 GN=v1g172583 PE=3 SV=1
A7SP30	Predicted protein OS=Nematostella vectensis OX=45351 GN=v1g172704 PE=4 SV=1
A7SPF6	Predicted protein OS=Nematostella vectensis OX=45351 GN=v1g172835 PE=4 SV=1
A7SPL2	Predicted protein OS=Nematostella vectensis OX=45351 GN=v1g172894 PE=4 SV=1
A7SQ75	Predicted protein OS=Nematostella vectensis OX=45351 GN=v1g173120 PE=3 SV=1
A7SQB8	Predicted protein OS=Nematostella vectensis OX=45351 GN=v1g173158 PE=4 SV=1
A7SQP8	Predicted protein OS=Nematostella vectensis OX=45351 GN=v1g173264 PE=4 SV=1
A7SQR0	Predicted protein OS=Nematostella vectensis OX=45351 GN=v1g173281 PE=4 SV=1
A7SQV7	Predicted protein OS=Nematostella vectensis OX=45351 GN=v1g173328 PE=3 SV=1
A7SRI6	Predicted protein OS=Nematostella vectensis OX=45351 GN=v1g173515 PE=4 SV=1
A7SSA9	Predicted protein OS=Nematostella vectensis OX=45351 GN=v1g173776 PE=4 SV=1
A7ST94	Predicted protein OS=Nematostella vectensis OX=45351 GN=v1g174073 PE=4 SV=1
A7STG9	Predicted protein OS=Nematostella vectensis OX=45351 GN=v1g174161 PE=3 SV=1
A7STR4	Predicted protein OS=Nematostella vectensis OX=45351 GN=v1g174238 PE=4 SV=1
A7STV3	Predicted protein OS=Nematostella vectensis OX=45351 GN=v1g174288 PE=4 SV=1
A7SUB4	Predicted protein OS=Nematostella vectensis OX=45351 GN=v1g174414 PE=4 SV=1
A7SV93	Predicted protein OS=Nematostella vectensis OX=45351 GN=v1g174745 PE=3 SV=1
A7SVJ4	Predicted protein OS=Nematostella vectensis OX=45351 GN=v1g174800 PE=4 SV=1
A7SVT4	Predicted protein OS=Nematostella vectensis OX=45351 GN=v1g174867 PE=3 SV=1
A7SVT6	Predicted protein OS=Nematostella vectensis OX=45351 GN=v1g174872 PE=3 SV=1
A7SWZ6	Predicted protein OS=Nematostella vectensis OX=45351 GN=v1g175175 PE=3 SV=1
A7SX83	Predicted protein OS=Nematostella vectensis OX=45351 GN=v1g175233 PE=3 SV=1
A7SZA1	Predicted protein OS=Nematostella vectensis OX=45351 GN=v1g175733 PE=3 SV=1
A7SZQ8	Predicted protein OS=Nematostella vectensis OX=45351 GN=v1g175823 PE=4 SV=1
A7SZR7	Predicted protein OS=Nematostella vectensis OX=45351 GN=v1g175837 PE=4 SV=1
A7T0U6	Predicted protein OS=Nematostella vectensis OX=45351 GN=v1g176042 PE=3 SV=1
A7T162	Predicted protein OS=Nematostella vectensis OX=45351 GN=v1g176140 PE=3 SV=1
A7T1E3	Predicted protein OS=Nematostella vectensis OX=45351 GN=v1g176215 PE=4 SV=1
A7T284	Predicted protein OS=Nematostella vectensis OX=45351 GN=v1g176351 PE=4 SV=1
A7T2D5	Predicted protein OS=Nematostella vectensis OX=45351 GN=v1g176370 PE=4 SV=1
A7RFM3	Predicted protein OS=Nematostella vectensis OX=45351 GN=v1g177213 PE=3 SV=1
A7RFS3	Predicted protein OS=Nematostella vectensis OX=45351 GN=v1g177264 PE=4 SV=1
A7RFX6	Predicted protein OS=Nematostella vectensis OX=45351 GN=v1g177334 PE=4 SV=1
A7RG04	Predicted protein OS=Nematostella vectensis OX=45351 GN=v1g177378 PE=4 SV=1
A7RGG4	Predicted protein OS=Nematostella vectensis OX=45351 GN=v1g177567 PE=3 SV=1
A7RGK2	Predicted protein OS=Nematostella vectensis OX=45351 GN=v1g177611 PE=4 SV=1
A7RGP1	Predicted protein OS=Nematostella vectensis OX=45351 GN=v1g177644 PE=3 SV=1
A7RGU9	Predicted protein OS=Nematostella vectensis OX=45351 GN=v1g177729 PE=4 SV=1
A7RH01	Predicted protein OS=Nematostella vectensis OX=45351 GN=v1g177781 PE=4 SV=1
A7RHS7	Predicted protein OS=Nematostella vectensis OX=45351 GN=v1g178049 PE=3 SV=1
A7RHV4	Predicted protein OS=Nematostella vectensis OX=45351 GN=v1g178088 PE=3 SV=1
A7RI30	Predicted protein OS=Nematostella vectensis OX=45351 GN=v1g178184 PE=4 SV=1
A7RIN5	Predicted protein OS=Nematostella vectensis OX=45351 GN=v1g178461 PE=4 SV=1
A7RIW1	Predicted protein OS=Nematostella vectensis OX=45351 GN=v1g178546 PE=4 SV=1
A7RJ18	Predicted protein OS=Nematostella vectensis OX=45351 GN=v1g178601 PE=4 SV=1
A7RJ66	Predicted protein OS=Nematostella vectensis OX=45351 GN=v1g178640 PE=3 SV=1
A7RJ72	Predicted protein OS=Nematostella vectensis OX=45351 GN=v1g178649 PE=3 SV=1
A7RJH6	Predicted protein OS=Nematostella vectensis OX=45351 GN=v1g178746 PE=4 SV=1
A7RJK4	Predicted protein OS=Nematostella vectensis OX=45351 GN=v1g178803 PE=3 SV=1
A7RJZ8	Predicted protein OS=Nematostella vectensis OX=45351 GN=v1g178888 PE=3 SV=1
A7RL61	Predicted protein OS=Nematostella vectensis OX=45351 GN=v1g179224 PE=4 SV=1
A7RLG5	Predicted protein OS=Nematostella vectensis OX=45351 GN=v1g179376 PE=3 SV=1
A7RLH1	Predicted protein OS=Nematostella vectensis OX=45351 GN=v1g179381 PE=4 SV=1
A7RLI7	Predicted protein OS=Nematostella vectensis OX=45351 GN=v1g179399 PE=4 SV=1
A7RLS5	Predicted protein OS=Nematostella vectensis OX=45351 GN=v1g179476 PE=3 SV=1
A7RLW3	Predicted protein OS=Nematostella vectensis OX=45351 GN=v1g179537 PE=3 SV=1
A7RLY6	Predicted protein OS=Nematostella vectensis OX=45351 GN=v1g179566 PE=3 SV=1
A7RM89	Predicted protein OS=Nematostella vectensis OX=45351 GN=v1g179675 PE=4 SV=1
A7RMA1	Predicted protein OS=Nematostella vectensis OX=45351 GN=v1g179696 PE=4 SV=1
A7RMA8	Predicted protein OS=Nematostella vectensis OX=45351 GN=v1g179716 PE=3 SV=1
A7RMC7	Predicted protein OS=Nematostella vectensis OX=45351 GN=v1g179729 PE=4 SV=1
A7RMX8	Predicted protein OS=Nematostella vectensis OX=45351 GN=v1g179973 PE=3 SV=1
A7RPY5	Predicted protein OS=Nematostella vectensis OX=45351 GN=v1g180651 PE=3 SV=1
A7RQV4	Predicted protein OS=Nematostella vectensis OX=45351 GN=v1g180912 PE=4 SV=1
A7RQX5	Predicted protein OS=Nematostella vectensis OX=45351 GN=v1g180943 PE=3 SV=1
A7RQZ2	Predicted protein OS=Nematostella vectensis OX=45351 GN=v1g180953 PE=4 SV=1
A7RRA1	Predicted protein OS=Nematostella vectensis OX=45351 GN=v1g181063 PE=3 SV=1
A7RRL9	Predicted protein OS=Nematostella vectensis OX=45351 GN=v1g181181 PE=3 SV=1
A7RRP2	Predicted protein OS=Nematostella vectensis OX=45351 GN=v1g181204 PE=4 SV=1
A7RRV2	Predicted protein OS=Nematostella vectensis OX=45351 GN=v1g181274 PE=4 SV=1
A7RS48	Predicted protein OS=Nematostella vectensis OX=45351 GN=v1g181382 PE=4 SV=1
A7RSB4	Predicted protein OS=Nematostella vectensis OX=45351 GN=v1g181421 PE=3 SV=1
A7RT59	Predicted protein OS=Nematostella vectensis OX=45351 GN=v1g181605 PE=3 SV=1
A7RT62	Predicted protein OS=Nematostella vectensis OX=45351 GN=v1g181611 PE=4 SV=1
A7RT97	Predicted protein OS=Nematostella vectensis OX=45351 GN=v1g181671 PE=3 SV=1
A7RU20	Predicted protein OS=Nematostella vectensis OX=45351 GN=v1g181969 PE=4 SV=1
A7RUD0	Predicted protein OS=Nematostella vectensis OX=45351 GN=v1g182064 PE=4 SV=1
A7RUW4	Predicted protein OS=Nematostella vectensis OX=45351 GN=v1g182231 PE=4 SV=1
A7RV02	Predicted protein OS=Nematostella vectensis OX=45351 GN=v1g182272 PE=4 SV=1
A7RV85	Predicted protein OS=Nematostella vectensis OX=45351 GN=v1g182353 PE=4 SV=1
A7RVE8	Predicted protein OS=Nematostella vectensis OX=45351 GN=v1g182399 PE=3 SV=1
A7RWP4	Predicted protein OS=Nematostella vectensis OX=45351 GN=v1g182805 PE=4 SV=1
A7RWT1	Predicted protein OS=Nematostella vectensis OX=45351 GN=v1g182833 PE=3 SV=1
A7RWU3	Predicted protein OS=Nematostella vectensis OX=45351 GN=v1g182854 PE=3 SV=1
A7RXX6	Predicted protein OS=Nematostella vectensis OX=45351 GN=v1g183227 PE=3 SV=1
A7RY06	Predicted protein OS=Nematostella vectensis OX=45351 GN=v1g183264 PE=4 SV=1
A7RYW5	Predicted protein OS=Nematostella vectensis OX=45351 GN=v1g183554 PE=4 SV=1
A7RZ09	Predicted protein OS=Nematostella vectensis OX=45351 GN=v1g183595 PE=4 SV=1
A7RZB8	Predicted protein OS=Nematostella vectensis OX=45351 GN=v1g183698 PE=3 SV=1
A7RZC0	Predicted protein OS=Nematostella vectensis OX=45351 GN=v1g183701 PE=3 SV=1
A7S0B9	Predicted protein OS=Nematostella vectensis OX=45351 GN=v1g184095 PE=3 SV=1
A7S0C0	Predicted protein OS=Nematostella vectensis OX=45351 GN=v1g184098 PE=3 SV=1
A7S0E0	Predicted protein OS=Nematostella vectensis OX=45351 GN=v1g184113 PE=3 SV=1
A7S0P5	Predicted protein OS=Nematostella vectensis OX=45351 GN=v1g184228 PE=4 SV=1
A7S138	Predicted protein OS=Nematostella vectensis OX=45351 GN=v1g184356 PE=4 SV=1
A7S1E6	Predicted protein OS=Nematostella vectensis OX=45351 GN=v1g184492 PE=4 SV=1
A7S1I1	Predicted protein OS=Nematostella vectensis OX=45351 GN=v1g184535 PE=3 SV=1
A7S1X1	Predicted protein OS=Nematostella vectensis OX=45351 GN=v1g184645 PE=3 SV=1
A7S260	Predicted protein OS=Nematostella vectensis OX=45351 GN=v1g184716 PE=4 SV=1
A7S2B4	Predicted protein OS=Nematostella vectensis OX=45351 GN=v1g184779 PE=3 SV=1
A7S2H8	Predicted protein OS=Nematostella vectensis OX=45351 GN=v1g184858 PE=4 SV=1
A7S2J6	Predicted protein OS=Nematostella vectensis OX=45351 GN=v1g184895 PE=4 SV=1
A7S303	Predicted protein OS=Nematostella vectensis OX=45351 GN=v1g185023 PE=4 SV=1
A7S335	Predicted protein OS=Nematostella vectensis OX=45351 GN=v1g185061 PE=4 SV=1
A7S382	Predicted protein OS=Nematostella vectensis OX=45351 GN=v1g185114 PE=3 SV=1
A7S3C7	Predicted protein OS=Nematostella vectensis OX=45351 GN=v1g185184 PE=4 SV=1
A7S4P4	Predicted protein OS=Nematostella vectensis OX=45351 GN=v1g185623 PE=3 SV=1
A7S4Z3	Predicted protein OS=Nematostella vectensis OX=45351 GN=v1g185723 PE=3 SV=1
A7S514	Predicted protein OS=Nematostella vectensis OX=45351 GN=v1g185753 PE=3 SV=1
A7S5I7	Predicted protein OS=Nematostella vectensis OX=45351 GN=v1g185913 PE=3 SV=1
A7S5R7	Predicted protein OS=Nematostella vectensis OX=45351 GN=v1g185991 PE=3 SV=1
A7S6D8	Predicted protein OS=Nematostella vectensis OX=45351 GN=v1g186249 PE=3 SV=1
A7S6J5	Predicted protein OS=Nematostella vectensis OX=45351 GN=v1g186301 PE=3 SV=1
A7S6K2	Predicted protein OS=Nematostella vectensis OX=45351 GN=v1g186309 PE=4 SV=1
A7S7S1	Predicted protein OS=Nematostella vectensis OX=45351 GN=v1g186693 PE=3 SV=1
A7S7U9	Predicted protein OS=Nematostella vectensis OX=45351 GN=v1g186732 PE=4 SV=1
A7S7W8	Predicted protein OS=Nematostella vectensis OX=45351 GN=v1g186750 PE=4 SV=1
A7S837	Predicted protein OS=Nematostella vectensis OX=45351 GN=v1g186829 PE=3 SV=1
A7S8G1	Predicted protein OS=Nematostella vectensis OX=45351 GN=v1g186925 PE=3 SV=1
A7S8G2	Predicted protein OS=Nematostella vectensis OX=45351 GN=v1g186929 PE=3 SV=1
A7SAS1	Predicted protein OS=Nematostella vectensis OX=45351 GN=v1g187679 PE=4 SV=1
A7SB93	Predicted protein OS=Nematostella vectensis OX=45351 GN=v1g187791 PE=3 SV=1
A7SBG2	Predicted protein OS=Nematostella vectensis OX=45351 GN=v1g187863 PE=3 SV=1
A7SBS4	Predicted protein OS=Nematostella vectensis OX=45351 GN=v1g187943 PE=3 SV=1
A7SC06	Predicted protein OS=Nematostella vectensis OX=45351 GN=v1g188037 PE=3 SV=1
A7SC12	Predicted protein OS=Nematostella vectensis OX=45351 GN=v1g188039 PE=4 SV=1
A7SC61	Predicted protein OS=Nematostella vectensis OX=45351 GN=v1g188073 PE=4 SV=1
A7SC77	Predicted protein OS=Nematostella vectensis OX=45351 GN=v1g188090 PE=4 SV=1
A7SCN8	Predicted protein OS=Nematostella vectensis OX=45351 GN=v1g188243 PE=3 SV=1
A7SD22	Predicted protein OS=Nematostella vectensis OX=45351 GN=v1g188356 PE=3 SV=1
A7SD62	Predicted protein OS=Nematostella vectensis OX=45351 GN=v1g188407 PE=3 SV=1
A7SDH7	Predicted protein OS=Nematostella vectensis OX=45351 GN=v1g188544 PE=3 SV=1
A7SDJ7	Predicted protein OS=Nematostella vectensis OX=45351 GN=v1g188563 PE=3 SV=1
A7SDQ2	Predicted protein OS=Nematostella vectensis OX=45351 GN=v1g188590 PE=4 SV=1
A7SED5	Predicted protein OS=Nematostella vectensis OX=45351 GN=v1g188859 PE=4 SV=1
A7SEM3	Predicted protein OS=Nematostella vectensis OX=45351 GN=v1g188927 PE=3 SV=1
A7SEN0	Predicted protein OS=Nematostella vectensis OX=45351 GN=v1g188937 PE=3 SV=1
A7SET4	Predicted protein OS=Nematostella vectensis OX=45351 GN=v1g189007 PE=3 SV=1
A7SF14	Predicted protein OS=Nematostella vectensis OX=45351 GN=v1g189079 PE=3 SV=1
A7SF35	Predicted protein OS=Nematostella vectensis OX=45351 GN=v1g189121 PE=4 SV=1
A7SF39	Predicted protein OS=Nematostella vectensis OX=45351 GN=v1g189124 PE=4 SV=1
A7SF43	Predicted protein OS=Nematostella vectensis OX=45351 GN=v1g189130 PE=3 SV=1
A7SG65	Predicted protein OS=Nematostella vectensis OX=45351 GN=v1g189485 PE=3 SV=1
A7SH35	Predicted protein OS=Nematostella vectensis OX=45351 GN=v1g189804 PE=3 SV=1
A7SHI2	Predicted protein OS=Nematostella vectensis OX=45351 GN=v1g189928 PE=3 SV=1
A7SHU3	Predicted protein OS=Nematostella vectensis OX=45351 GN=v1g189983 PE=4 SV=1
A7SHX1	Predicted protein OS=Nematostella vectensis OX=45351 GN=v1g190019 PE=3 SV=1
A7SIT3	Predicted protein OS=Nematostella vectensis OX=45351 GN=v1g190239 PE=4 SV=1
A7SJ12	Predicted protein OS=Nematostella vectensis OX=45351 GN=v1g190290 PE=4 SV=1
A7SJC7	Predicted protein OS=Nematostella vectensis OX=45351 GN=v1g190388 PE=4 SV=1
A7SJW4	Predicted protein OS=Nematostella vectensis OX=45351 GN=v1g190623 PE=3 SV=1
A7SJZ7	Predicted protein OS=Nematostella vectensis OX=45351 GN=v1g190658 PE=4 SV=1
A7SK19	Predicted protein OS=Nematostella vectensis OX=45351 GN=v1g190669 PE=3 SV=1
A7SKE6	Predicted protein OS=Nematostella vectensis OX=45351 GN=v1g190767 PE=4 SV=1
A7SKH6	Predicted protein OS=Nematostella vectensis OX=45351 GN=v1g190793 PE=3 SV=1
A7SKT2	Predicted protein OS=Nematostella vectensis OX=45351 GN=v1g190891 PE=4 SV=1
A7SMH0	Predicted protein OS=Nematostella vectensis OX=45351 GN=v1g191334 PE=3 SV=1
A7SMW8	Predicted protein OS=Nematostella vectensis OX=45351 GN=v1g191466 PE=4 SV=1
A7SN59	Predicted protein OS=Nematostella vectensis OX=45351 GN=v1g191580 PE=3 SV=1
A7SNR0	Predicted protein OS=Nematostella vectensis OX=45351 GN=v1g191780 PE=4 SV=1
A7SNX0	Predicted protein OS=Nematostella vectensis OX=45351 GN=v1g191860 PE=3 SV=1
A7SPJ4	Predicted protein OS=Nematostella vectensis OX=45351 GN=v1g192075 PE=3 SV=1
A7SQ90	Predicted protein OS=Nematostella vectensis OX=45351 GN=v1g192342 PE=4 SV=1
A7SQP7	Predicted protein OS=Nematostella vectensis OX=45351 GN=v1g192469 PE=4 SV=1
A7SQQ2	Predicted protein OS=Nematostella vectensis OX=45351 GN=v1g192479 PE=4 SV=1
A7SR82	Predicted protein OS=Nematostella vectensis OX=45351 GN=v1g192627 PE=4 SV=1
A7SR87	Predicted protein OS=Nematostella vectensis OX=45351 GN=v1g192646 PE=4 SV=1
A7SRK9	Predicted protein OS=Nematostella vectensis OX=45351 GN=v1g192750 PE=3 SV=1
A7SSB1	Predicted protein OS=Nematostella vectensis OX=45351 GN=v1g192985 PE=4 SV=1
A7ST02	Predicted protein OS=Nematostella vectensis OX=45351 GN=v1g193205 PE=4 SV=1
A7ST09	Predicted protein OS=Nematostella vectensis OX=45351 GN=v1g193215 PE=3 SV=1
A7STK4	Predicted protein OS=Nematostella vectensis OX=45351 GN=v1g193385 PE=4 SV=1
A7SUE4	Predicted protein OS=Nematostella vectensis OX=45351 GN=v1g193638 PE=4 SV=1
A7SUJ1	Predicted protein OS=Nematostella vectensis OX=45351 GN=v1g193684 PE=3 SV=1
A7SUU3	Predicted protein OS=Nematostella vectensis OX=45351 GN=v1g193817 PE=3 SV=1
A7SV88	Predicted protein OS=Nematostella vectensis OX=45351 GN=v1g193946 PE=3 SV=1
A7SWS9	Predicted protein OS=Nematostella vectensis OX=45351 GN=v1g194326 PE=3 SV=1
A7SWU2	Predicted protein OS=Nematostella vectensis OX=45351 GN=v1g194333 PE=4 SV=1
A7SXC0	Predicted protein OS=Nematostella vectensis OX=45351 GN=v1g194470 PE=3 SV=1
A7SXL5	Predicted protein OS=Nematostella vectensis OX=45351 GN=v1g194582 PE=3 SV=1
A7SYP4	Predicted protein OS=Nematostella vectensis OX=45351 GN=v1g194841 PE=3 SV=1
A7SZ09	Predicted protein OS=Nematostella vectensis OX=45351 GN=v1g194889 PE=3 SV=1
A7T0T9	Predicted protein OS=Nematostella vectensis OX=45351 GN=v1g195236 PE=4 SV=1
A7T144	Predicted protein OS=Nematostella vectensis OX=45351 GN=v1g195315 PE=3 SV=1
A7T2D4	Predicted protein OS=Nematostella vectensis OX=45351 GN=v1g195566 PE=3 SV=1
A7T5A3	Predicted protein OS=Nematostella vectensis OX=45351 GN=v1g195800 PE=4 SV=1
A7REQ6	Predicted protein OS=Nematostella vectensis OX=45351 GN=v1g196099 PE=3 SV=1
A7RF41	Predicted protein OS=Nematostella vectensis OX=45351 GN=v1g196263 PE=4 SV=1
A7RF42	Predicted protein OS=Nematostella vectensis OX=45351 GN=v1g196264 PE=4 SV=1
A7RFB4	Predicted protein OS=Nematostella vectensis OX=45351 GN=v1g196354 PE=3 SV=1
A7RFD3	Predicted protein OS=Nematostella vectensis OX=45351 GN=v1g196376 PE=4 SV=1
A7RGA2	Predicted protein OS=Nematostella vectensis OX=45351 GN=v1g196762 PE=4 SV=1
A7RGC8	Predicted protein OS=Nematostella vectensis OX=45351 GN=v1g196778 PE=4 SV=1
A7RGH4	Predicted protein OS=Nematostella vectensis OX=45351 GN=v1g196829 PE=3 SV=1
A7RGY6	Predicted protein OS=Nematostella vectensis OX=45351 GN=v1g196990 PE=4 SV=1
A7RGZ5	Predicted protein OS=Nematostella vectensis OX=45351 GN=v1g197000 PE=3 SV=1
A7RHH9	Predicted protein OS=Nematostella vectensis OX=45351 GN=v1g197208 PE=3 SV=1
A7RHJ0	Predicted protein OS=Nematostella vectensis OX=45351 GN=v1g197216 PE=4 SV=1
A7RHS0	Predicted protein OS=Nematostella vectensis OX=45351 GN=v1g197301 PE=4 SV=1
A7RI05	Predicted protein OS=Nematostella vectensis OX=45351 GN=v1g197410 PE=4 SV=1
A7RI76	Predicted protein OS=Nematostella vectensis OX=45351 GN=v1g197490 PE=4 SV=1
A7RI87	Predicted protein OS=Nematostella vectensis OX=45351 GN=v1g197501 PE=4 SV=1
A7RI90	Predicted protein OS=Nematostella vectensis OX=45351 GN=v1g197507 PE=4 SV=1
A7RIH5	Predicted protein OS=Nematostella vectensis OX=45351 GN=v1g197607 PE=3 SV=1
A7RIT3	Predicted protein OS=Nematostella vectensis OX=45351 GN=v1g197744 PE=3 SV=1
A7RJB4	Predicted protein OS=Nematostella vectensis OX=45351 GN=v1g197953 PE=4 SV=1
A7RJM2	Predicted protein OS=Nematostella vectensis OX=45351 GN=v1g198083 PE=3 SV=1
A7RJY0	Predicted protein OS=Nematostella vectensis OX=45351 GN=v1g198217 PE=4 SV=1
A7RJY2	Predicted protein OS=Nematostella vectensis OX=45351 GN=v1g198219 PE=4 SV=1
A7RK47	Predicted protein OS=Nematostella vectensis OX=45351 GN=v1g198281 PE=4 SV=1
A7RK73	Predicted protein OS=Nematostella vectensis OX=45351 GN=v1g198315 PE=3 SV=1
A7RKN2	Predicted protein OS=Nematostella vectensis OX=45351 GN=v1g198494 PE=4 SV=1
A7RL58	Predicted protein OS=Nematostella vectensis OX=45351 GN=v1g198703 PE=4 SV=1
A7RLD8	Predicted protein OS=Nematostella vectensis OX=45351 GN=v1g198805 PE=4 SV=1
A7RLF8	Predicted protein OS=Nematostella vectensis OX=45351 GN=v1g198827 PE=4 SV=1
A7RLN6	Predicted protein OS=Nematostella vectensis OX=45351 GN=v1g198917 PE=3 SV=1
A7RLP1	Predicted protein OS=Nematostella vectensis OX=45351 GN=v1g198924 PE=4 SV=1
A7RMB6	Predicted protein OS=Nematostella vectensis OX=45351 GN=v1g199225 PE=4 SV=1
A7RMC3	Predicted protein OS=Nematostella vectensis OX=45351 GN=v1g199235 PE=4 SV=1
A7RMI9	Predicted protein OS=Nematostella vectensis OX=45351 GN=v1g199300 PE=4 SV=1
A7RMJ1	Predicted protein OS=Nematostella vectensis OX=45351 GN=v1g199302 PE=4 SV=1
A7RMR4	Predicted protein OS=Nematostella vectensis OX=45351 GN=v1g199401 PE=3 SV=1
A7RMT5	Predicted protein OS=Nematostella vectensis OX=45351 GN=v1g199428 PE=4 SV=1
A7RMU0	Predicted protein OS=Nematostella vectensis OX=45351 GN=v1g199437 PE=4 SV=1
A7RMX1	Predicted protein OS=Nematostella vectensis OX=45351 GN=v1g199483 PE=4 SV=1
A7RN19	Predicted protein OS=Nematostella vectensis OX=45351 GN=v1g199545 PE=3 SV=1
A7RN39	Predicted protein OS=Nematostella vectensis OX=45351 GN=v1g199564 PE=4 SV=1
A7RNH2	Predicted protein OS=Nematostella vectensis OX=45351 GN=v1g199711 PE=4 SV=1
A7RNH8	Predicted protein OS=Nematostella vectensis OX=45351 GN=v1g199717 PE=3 SV=1
A7RNW5	Predicted protein OS=Nematostella vectensis OX=45351 GN=v1g199885 PE=4 SV=1
A7RP02	Predicted protein OS=Nematostella vectensis OX=45351 GN=v1g199927 PE=4 SV=1
A7RP35	Predicted protein OS=Nematostella vectensis OX=45351 GN=v1g199963 PE=4 SV=1
A7RP78	Predicted protein OS=Nematostella vectensis OX=45351 GN=v1g200013 PE=3 SV=1
A7RP96	Predicted protein OS=Nematostella vectensis OX=45351 GN=v1g200034 PE=4 SV=1
A7RPE4	Predicted protein OS=Nematostella vectensis OX=45351 GN=v1g200103 PE=4 SV=1
A7RPE6	Predicted protein OS=Nematostella vectensis OX=45351 GN=v1g200105 PE=4 SV=1
A7RPF8	Predicted protein OS=Nematostella vectensis OX=45351 GN=v1g200128 PE=4 SV=1
A7RPI9	Predicted protein OS=Nematostella vectensis OX=45351 GN=v1g200173 PE=4 SV=1
A7RPM0	Predicted protein OS=Nematostella vectensis OX=45351 GN=v1g200212 PE=4 SV=1
A7RPQ5	Predicted protein OS=Nematostella vectensis OX=45351 GN=v1g200262 PE=4 SV=1
A7RPQ8	Predicted protein OS=Nematostella vectensis OX=45351 GN=v1g200267 PE=4 SV=1
A7RPS6	Predicted protein OS=Nematostella vectensis OX=45351 GN=v1g200285 PE=3 SV=1
A7RQ95	Predicted protein OS=Nematostella vectensis OX=45351 GN=v1g200495 PE=4 SV=1
A7RQC1	Predicted protein OS=Nematostella vectensis OX=45351 GN=v1g200530 PE=3 SV=1
A7RQP3	Predicted protein OS=Nematostella vectensis OX=45351 GN=v1g200670 PE=4 SV=1
A7RR23	Predicted protein OS=Nematostella vectensis OX=45351 GN=v1g200840 PE=4 SV=1
A7RRJ4	Predicted protein OS=Nematostella vectensis OX=45351 GN=v1g201060 PE=4 SV=1
A7RSD4	Predicted protein OS=Nematostella vectensis OX=45351 GN=v1g201408 PE=4 SV=1
A7RST0	Predicted protein OS=Nematostella vectensis OX=45351 GN=v1g201589 PE=3 SV=1
A7RT04	Predicted protein OS=Nematostella vectensis OX=45351 GN=v1g201700 PE=4 SV=1
A7RTG5	Predicted protein OS=Nematostella vectensis OX=45351 GN=v1g201895 PE=4 SV=1
A7RTK9	Predicted protein OS=Nematostella vectensis OX=45351 GN=v1g201959 PE=4 SV=1
A7RTT9	Predicted protein OS=Nematostella vectensis OX=45351 GN=v1g202054 PE=4 SV=1
A7RTU3	Predicted protein OS=Nematostella vectensis OX=45351 GN=v1g202059 PE=4 SV=1
A7RU67	Predicted protein OS=Nematostella vectensis OX=45351 GN=v1g202227 PE=4 SV=1
A7RUC6	Predicted protein OS=Nematostella vectensis OX=45351 GN=v1g202288 PE=4 SV=1
A7RUT8	Predicted protein OS=Nematostella vectensis OX=45351 GN=v1g202473 PE=4 SV=1
A7RV52	Predicted protein OS=Nematostella vectensis OX=45351 GN=v1g202596 PE=4 SV=1
A7RVE1	Predicted protein OS=Nematostella vectensis OX=45351 GN=v1g202708 PE=4 SV=1
A7RVG4	Predicted protein OS=Nematostella vectensis OX=45351 GN=v1g202733 PE=4 SV=1
A7RVI6	Predicted protein OS=Nematostella vectensis OX=45351 GN=v1g202761 PE=4 SV=1
A7RVQ6	Predicted protein OS=Nematostella vectensis OX=45351 GN=v1g202841 PE=4 SV=1
A7RVY9	Predicted protein OS=Nematostella vectensis OX=45351 GN=v1g202950 PE=4 SV=1
A7RW99	Predicted protein OS=Nematostella vectensis OX=45351 GN=v1g203088 PE=3 SV=1
A7RWF4	Predicted protein OS=Nematostella vectensis OX=45351 GN=v1g203154 PE=4 SV=1
A7RWN6	Predicted protein OS=Nematostella vectensis OX=45351 GN=v1g203270 PE=3 SV=1
A7RWP0	Predicted protein OS=Nematostella vectensis OX=45351 GN=v1g203274 PE=3 SV=1
A7RWQ5	Predicted protein OS=Nematostella vectensis OX=45351 GN=v1g203293 PE=4 SV=1
A7RWQ9	Predicted protein OS=Nematostella vectensis OX=45351 GN=v1g203296 PE=4 SV=1
A7RX71	Predicted protein OS=Nematostella vectensis OX=45351 GN=v1g203479 PE=4 SV=1
A7RXH8	Predicted protein OS=Nematostella vectensis OX=45351 GN=v1g203613 PE=4 SV=1
A7RXK8	Predicted protein OS=Nematostella vectensis OX=45351 GN=v1g203643 PE=4 SV=1
A7RXL2	Predicted protein OS=Nematostella vectensis OX=45351 GN=v1g203646 PE=3 SV=1
A7RXM1	Predicted protein OS=Nematostella vectensis OX=45351 GN=v1g203655 PE=4 SV=1
A7RY02	Predicted protein OS=Nematostella vectensis OX=45351 GN=v1g203816 PE=4 SV=1
A7RY13	Predicted protein OS=Nematostella vectensis OX=45351 GN=v1g203827 PE=3 SV=1
A7RYR9	Predicted protein OS=Nematostella vectensis OX=45351 GN=v1g204120 PE=3 SV=1
A7RYT0	Predicted protein OS=Nematostella vectensis OX=45351 GN=v1g204136 PE=3 SV=1
A7RYW2	Predicted protein OS=Nematostella vectensis OX=45351 GN=v1g204186 PE=4 SV=1
A7RYZ5	Predicted protein OS=Nematostella vectensis OX=45351 GN=v1g204234 PE=3 SV=1
A7RZ36	Predicted protein OS=Nematostella vectensis OX=45351 GN=v1g204287 PE=4 SV=1
A7RZU3	Predicted protein OS=Nematostella vectensis OX=45351 GN=v1g204602 PE=4 SV=1
A7RZU7	Predicted protein OS=Nematostella vectensis OX=45351 GN=v1g204606 PE=4 SV=1
A7S0A0	Predicted protein OS=Nematostella vectensis OX=45351 GN=v1g204809 PE=4 SV=1
A7S0C8	Predicted protein OS=Nematostella vectensis OX=45351 GN=v1g204835 PE=4 SV=1
A7S0I0	Predicted protein OS=Nematostella vectensis OX=45351 GN=v1g204900 PE=3 SV=1
A7S0K3	Predicted protein OS=Nematostella vectensis OX=45351 GN=v1g204928 PE=3 SV=1
A7S177	Predicted protein OS=Nematostella vectensis OX=45351 GN=v1g205229 PE=4 SV=1
A7S1E1	Predicted protein OS=Nematostella vectensis OX=45351 GN=v1g205307 PE=4 SV=1
A7S1H5	Predicted protein OS=Nematostella vectensis OX=45351 GN=v1g205348 PE=3 SV=1
A7S1J9	Predicted protein OS=Nematostella vectensis OX=45351 GN=v1g205377 PE=4 SV=1
A7S1Y8	Predicted protein OS=Nematostella vectensis OX=45351 GN=v1g205537 PE=4 SV=1
A7S2A8	Predicted protein OS=Nematostella vectensis OX=45351 GN=v1g205676 PE=4 SV=1
A7S2G0	Predicted protein OS=Nematostella vectensis OX=45351 GN=v1g205757 PE=4 SV=1
A7S2H3	Predicted protein OS=Nematostella vectensis OX=45351 GN=v1g205772 PE=4 SV=1
A7S2W7	Predicted protein OS=Nematostella vectensis OX=45351 GN=v1g205949 PE=4 SV=1
A7S3Q5	Predicted protein OS=Nematostella vectensis OX=45351 GN=v1g206329 PE=3 SV=1
A7S4F2	Predicted protein OS=Nematostella vectensis OX=45351 GN=v1g206654 PE=3 SV=1
A7S4X0	Predicted protein OS=Nematostella vectensis OX=45351 GN=v1g206855 PE=3 SV=1
A7S576	Predicted protein OS=Nematostella vectensis OX=45351 GN=v1g206995 PE=4 SV=1
A7S577	Predicted protein OS=Nematostella vectensis OX=45351 GN=v1g206996 PE=3 SV=1
A7S584	Predicted protein OS=Nematostella vectensis OX=45351 GN=v1g207005 PE=4 SV=1
A7S5H5	Predicted protein OS=Nematostella vectensis OX=45351 GN=v1g207110 PE=3 SV=1
A7S5H6	Predicted protein OS=Nematostella vectensis OX=45351 GN=v1g207112 PE=4 SV=1
A7S5N4	Predicted protein OS=Nematostella vectensis OX=45351 GN=v1g207188 PE=4 SV=1
A7S5P0	Predicted protein OS=Nematostella vectensis OX=45351 GN=v1g207195 PE=4 SV=1
A7S5P7	Predicted protein OS=Nematostella vectensis OX=45351 GN=v1g207204 PE=4 SV=1
A7S5V6	Predicted protein OS=Nematostella vectensis OX=45351 GN=v1g207272 PE=3 SV=1
A7S605	Predicted protein OS=Nematostella vectensis OX=45351 GN=v1g207332 PE=4 SV=1
A7S625	Predicted protein OS=Nematostella vectensis OX=45351 GN=v1g207364 PE=4 SV=1
A7S643	Predicted protein OS=Nematostella vectensis OX=45351 GN=v1g207386 PE=4 SV=1
A7S660	Predicted protein OS=Nematostella vectensis OX=45351 GN=v1g207412 PE=4 SV=1
A7S661	Predicted protein OS=Nematostella vectensis OX=45351 GN=v1g207413 PE=4 SV=1
A7S663	Predicted protein OS=Nematostella vectensis OX=45351 GN=v1g207415 PE=4 SV=1
A7S664	Predicted protein OS=Nematostella vectensis OX=45351 GN=v1g207416 PE=4 SV=1
A7S666	Predicted protein OS=Nematostella vectensis OX=45351 GN=v1g207418 PE=3 SV=1
A7S7H1	Predicted protein OS=Nematostella vectensis OX=45351 GN=v1g207979 PE=4 SV=1
A7S7J3	Predicted protein OS=Nematostella vectensis OX=45351 GN=v1g208016 PE=4 SV=1
A7S7Z7	Predicted protein OS=Nematostella vectensis OX=45351 GN=v1g208190 PE=4 SV=1
A7S803	Predicted protein OS=Nematostella vectensis OX=45351 GN=v1g208197 PE=3 SV=1
A7S854	Predicted protein OS=Nematostella vectensis OX=45351 GN=v1g208267 PE=4 SV=1
A7S8B3	Predicted protein OS=Nematostella vectensis OX=45351 GN=v1g208345 PE=4 SV=1
A7S8D1	Predicted protein OS=Nematostella vectensis OX=45351 GN=v1g208361 PE=3 SV=1
A7S8I0	Predicted protein OS=Nematostella vectensis OX=45351 GN=v1g208419 PE=4 SV=1
A7S8Q7	Predicted protein OS=Nematostella vectensis OX=45351 GN=v1g208515 PE=4 SV=1
A7S8U7	Predicted protein OS=Nematostella vectensis OX=45351 GN=v1g208563 PE=4 SV=1
A7S906	Predicted protein OS=Nematostella vectensis OX=45351 GN=v1g208634 PE=4 SV=1
A7S907	Predicted protein OS=Nematostella vectensis OX=45351 GN=v1g208635 PE=4 SV=1
A7S941	Predicted protein OS=Nematostella vectensis OX=45351 GN=v1g208678 PE=3 SV=1
A7S971	Predicted protein OS=Nematostella vectensis OX=45351 GN=v1g208719 PE=4 SV=1
A7S9I1	Predicted protein OS=Nematostella vectensis OX=45351 GN=v1g208843 PE=4 SV=1
A7S9M2	Predicted protein OS=Nematostella vectensis OX=45351 GN=v1g208897 PE=3 SV=1
A7S9S9	Predicted protein OS=Nematostella vectensis OX=45351 GN=v1g208975 PE=4 SV=1
A7S9T1	Predicted protein OS=Nematostella vectensis OX=45351 GN=v1g208977 PE=4 SV=1
A7SA41	Predicted protein OS=Nematostella vectensis OX=45351 GN=v1g209103 PE=4 SV=1
A7SAG4	Predicted protein OS=Nematostella vectensis OX=45351 GN=v1g209258 PE=3 SV=1
A7SAH7	Predicted protein OS=Nematostella vectensis OX=45351 GN=v1g209267 PE=4 SV=1
A7SB80	Predicted protein OS=Nematostella vectensis OX=45351 GN=v1g209600 PE=3 SV=1
A7SBC1	Predicted protein OS=Nematostella vectensis OX=45351 GN=v1g209643 PE=3 SV=1
A7SBE5	Predicted protein OS=Nematostella vectensis OX=45351 GN=v1g209669 PE=4 SV=1
A7SBH1	Predicted protein OS=Nematostella vectensis OX=45351 GN=v1g209704 PE=3 SV=1
A7SBN1	Predicted protein OS=Nematostella vectensis OX=45351 GN=v1g209768 PE=4 SV=1
A7SC28	Predicted protein OS=Nematostella vectensis OX=45351 GN=v1g209974 PE=4 SV=1
A7SC63	Predicted protein OS=Nematostella vectensis OX=45351 GN=v1g210012 PE=3 SV=1
A7SCA4	Predicted protein OS=Nematostella vectensis OX=45351 GN=v1g210064 PE=3 SV=1
A7SCW0	Predicted protein OS=Nematostella vectensis OX=45351 GN=v1g210296 PE=4 SV=1
A7SD97	Predicted protein OS=Nematostella vectensis OX=45351 GN=v1g210488 PE=4 SV=1
A7SDC2	Predicted protein OS=Nematostella vectensis OX=45351 GN=v1g210524 PE=4 SV=1
A7SDM6	Predicted protein OS=Nematostella vectensis OX=45351 GN=v1g210662 PE=4 SV=1
A7SDS6	Predicted protein OS=Nematostella vectensis OX=45351 GN=v1g210710 PE=3 SV=1
A7SDT8	Predicted protein OS=Nematostella vectensis OX=45351 GN=v1g210724 PE=4 SV=1
A7SDU4	Predicted protein OS=Nematostella vectensis OX=45351 GN=v1g210732 PE=4 SV=1
A7SE62	Predicted protein OS=Nematostella vectensis OX=45351 GN=v1g210881 PE=3 SV=1
A7SEA7	Predicted protein OS=Nematostella vectensis OX=45351 GN=v1g210933 PE=3 SV=1
A7SEB7	Predicted protein OS=Nematostella vectensis OX=45351 GN=v1g210948 PE=4 SV=1
A7SF37	Predicted protein OS=Nematostella vectensis OX=45351 GN=v1g211304 PE=4 SV=1
A7SF38	Predicted protein OS=Nematostella vectensis OX=45351 GN=v1g211305 PE=4 SV=1
A7SF44	Predicted protein OS=Nematostella vectensis OX=45351 GN=v1g211309 PE=3 SV=1
A7SF45	Predicted protein OS=Nematostella vectensis OX=45351 GN=v1g211310 PE=3 SV=1
A7SFD3	Predicted protein OS=Nematostella vectensis OX=45351 GN=v1g211421 PE=4 SV=1
A7SFG4	Predicted protein OS=Nematostella vectensis OX=45351 GN=v1g211464 PE=4 SV=1
A7SFJ6	Predicted protein OS=Nematostella vectensis OX=45351 GN=v1g211503 PE=4 SV=1
A7SFR8	Predicted protein OS=Nematostella vectensis OX=45351 GN=v1g211581 PE=4 SV=1
A7SG03	Predicted protein OS=Nematostella vectensis OX=45351 GN=v1g211696 PE=4 SV=1
A7SG47	Predicted protein OS=Nematostella vectensis OX=45351 GN=v1g211757 PE=4 SV=1
A7SGB4	Predicted protein OS=Nematostella vectensis OX=45351 GN=v1g211848 PE=3 SV=1
A7SGH7	Predicted protein OS=Nematostella vectensis OX=45351 GN=v1g211930 PE=3 SV=1
A7SGL4	Predicted protein OS=Nematostella vectensis OX=45351 GN=v1g211989 PE=4 SV=1
A7SGL5	Predicted protein OS=Nematostella vectensis OX=45351 GN=v1g211990 PE=4 SV=1
A7SH51	Predicted protein OS=Nematostella vectensis OX=45351 GN=v1g212210 PE=4 SV=1
A7SHB9	Predicted protein OS=Nematostella vectensis OX=45351 GN=v1g212291 PE=4 SV=1
A7SHE7	Predicted protein OS=Nematostella vectensis OX=45351 GN=v1g212323 PE=4 SV=1
A7SHJ8	Predicted protein OS=Nematostella vectensis OX=45351 GN=v1g212385 PE=4 SV=1
A7SI69	Predicted protein OS=Nematostella vectensis OX=45351 GN=v1g212656 PE=4 SV=1
A7SI70	Predicted protein OS=Nematostella vectensis OX=45351 GN=v1g212657 PE=4 SV=1
A7SIV2	Predicted protein OS=Nematostella vectensis OX=45351 GN=v1g212950 PE=4 SV=1
A7SJ03	Predicted protein OS=Nematostella vectensis OX=45351 GN=v1g213018 PE=4 SV=1
A7SJ27	Predicted protein OS=Nematostella vectensis OX=45351 GN=v1g213049 PE=4 SV=1
A7SJ96	Predicted protein OS=Nematostella vectensis OX=45351 GN=v1g213132 PE=4 SV=1
A7SJC5	Predicted protein OS=Nematostella vectensis OX=45351 GN=v1g213159 PE=4 SV=1
A7SJK6	Predicted protein OS=Nematostella vectensis OX=45351 GN=v1g213250 PE=3 SV=1
A7SJS0	Predicted protein OS=Nematostella vectensis OX=45351 GN=v1g213342 PE=4 SV=1
A7SJS2	Predicted protein OS=Nematostella vectensis OX=45351 GN=v1g213347 PE=3 SV=1
A7SK37	Predicted protein OS=Nematostella vectensis OX=45351 GN=v1g213493 PE=4 SV=1
A7SKZ9	Predicted protein OS=Nematostella vectensis OX=45351 GN=v1g213913 PE=3 SV=1
A7SL33	Predicted protein OS=Nematostella vectensis OX=45351 GN=v1g213955 PE=4 SV=1
A7SLK6	Predicted protein OS=Nematostella vectensis OX=45351 GN=v1g214160 PE=4 SV=1
A7SLP0	Predicted protein OS=Nematostella vectensis OX=45351 GN=v1g214210 PE=4 SV=1
A7SLR4	Predicted protein OS=Nematostella vectensis OX=45351 GN=v1g214244 PE=4 SV=1
A7SLW0	Predicted protein OS=Nematostella vectensis OX=45351 GN=v1g214299 PE=4 SV=1
A7SM14	Predicted protein OS=Nematostella vectensis OX=45351 GN=v1g214361 PE=4 SV=1
A7SMA6	Predicted protein OS=Nematostella vectensis OX=45351 GN=v1g214461 PE=4 SV=1
A7SMH8	Predicted protein OS=Nematostella vectensis OX=45351 GN=v1g214543 PE=4 SV=1
A7SMZ4	Predicted protein OS=Nematostella vectensis OX=45351 GN=v1g214753 PE=3 SV=1
A7SN02	Predicted protein OS=Nematostella vectensis OX=45351 GN=v1g214761 PE=4 SV=1
A7SN04	Predicted protein OS=Nematostella vectensis OX=45351 GN=v1g214763 PE=4 SV=1
A7SN30	Predicted protein OS=Nematostella vectensis OX=45351 GN=v1g214798 PE=3 SV=1
A7SNM9	Predicted protein OS=Nematostella vectensis OX=45351 GN=v1g215021 PE=4 SV=1
A7SNU7	Predicted protein OS=Nematostella vectensis OX=45351 GN=v1g215101 PE=4 SV=1
A7SPV3	Predicted protein OS=Nematostella vectensis OX=45351 GN=v1g215590 PE=4 SV=1
A7SPV6	Predicted protein OS=Nematostella vectensis OX=45351 GN=v1g215592 PE=3 SV=1
A7SPV7	Predicted protein OS=Nematostella vectensis OX=45351 GN=v1g215593 PE=3 SV=1
A7SQ26	Predicted protein OS=Nematostella vectensis OX=45351 GN=v1g215658 PE=4 SV=1
A7SQ60	Predicted protein OS=Nematostella vectensis OX=45351 GN=v1g215693 PE=3 SV=1
A7SQC8	Predicted protein OS=Nematostella vectensis OX=45351 GN=v1g215767 PE=4 SV=1
A7SQW0	Predicted protein OS=Nematostella vectensis OX=45351 GN=v1g216000 PE=4 SV=1
A7SR89	Predicted protein OS=Nematostella vectensis OX=45351 GN=v1g216187 PE=4 SV=1
A7SRJ7	Predicted protein OS=Nematostella vectensis OX=45351 GN=v1g216337 PE=4 SV=1
A7SRU7	Predicted protein OS=Nematostella vectensis OX=45351 GN=v1g216465 PE=4 SV=1
A7SRW6	Predicted protein OS=Nematostella vectensis OX=45351 GN=v1g216488 PE=3 SV=1
A7SS21	Predicted protein OS=Nematostella vectensis OX=45351 GN=v1g216575 PE=4 SV=1
A7SS35	Predicted protein OS=Nematostella vectensis OX=45351 GN=v1g216597 PE=4 SV=1
A7SS38	Predicted protein OS=Nematostella vectensis OX=45351 GN=v1g216602 PE=3 SV=1
A7SS91	Predicted protein OS=Nematostella vectensis OX=45351 GN=v1g216666 PE=4 SV=1
A7SSA4	Predicted protein OS=Nematostella vectensis OX=45351 GN=v1g216683 PE=4 SV=1
A7SSK6	Predicted protein OS=Nematostella vectensis OX=45351 GN=v1g216814 PE=4 SV=1
A7SSL5	Predicted protein OS=Nematostella vectensis OX=45351 GN=v1g216823 PE=3 SV=1
A7STC5	Predicted protein OS=Nematostella vectensis OX=45351 GN=v1g217188 PE=3 SV=1
A7STV5	Predicted protein OS=Nematostella vectensis OX=45351 GN=v1g217424 PE=4 SV=1
A7STV7	Predicted protein OS=Nematostella vectensis OX=45351 GN=v1g217427 PE=4 SV=1
A7STY5	Predicted protein OS=Nematostella vectensis OX=45351 GN=v1g217461 PE=4 SV=1
A7SUR8	Predicted protein OS=Nematostella vectensis OX=45351 GN=v1g217783 PE=4 SV=1
A7SUV6	Predicted protein OS=Nematostella vectensis OX=45351 GN=v1g217833 PE=3 SV=1
A7SV14	Predicted protein OS=Nematostella vectensis OX=45351 GN=v1g217904 PE=4 SV=1
A7SV32	Predicted protein OS=Nematostella vectensis OX=45351 GN=v1g217932 PE=4 SV=1
A7SV34	Predicted protein OS=Nematostella vectensis OX=45351 GN=v1g217934 PE=4 SV=1
A7SVC4	Predicted protein OS=Nematostella vectensis OX=45351 GN=v1g218041 PE=3 SV=1
A7SVE2	Predicted protein OS=Nematostella vectensis OX=45351 GN=v1g218063 PE=4 SV=1
A7SVE3	Predicted protein OS=Nematostella vectensis OX=45351 GN=v1g218064 PE=4 SV=1
A7SVG0	Predicted protein OS=Nematostella vectensis OX=45351 GN=v1g218078 PE=3 SV=1
A7SVQ4	Predicted protein OS=Nematostella vectensis OX=45351 GN=v1g218210 PE=4 SV=1
A7SVU4	Predicted protein OS=Nematostella vectensis OX=45351 GN=v1g218266 PE=4 SV=1
A7SW08	Predicted protein OS=Nematostella vectensis OX=45351 GN=v1g218352 PE=4 SV=1
A7SW76	Predicted protein OS=Nematostella vectensis OX=45351 GN=v1g218444 PE=4 SV=1
A7SWK0	Predicted protein OS=Nematostella vectensis OX=45351 GN=v1g218593 PE=3 SV=1
A7SWR9	Predicted protein OS=Nematostella vectensis OX=45351 GN=v1g218685 PE=3 SV=1
A7SXB3	Predicted protein OS=Nematostella vectensis OX=45351 GN=v1g218953 PE=4 SV=1
A7SXC7	Predicted protein OS=Nematostella vectensis OX=45351 GN=v1g218972 PE=4 SV=1
A7SXE3	Predicted protein OS=Nematostella vectensis OX=45351 GN=v1g218988 PE=4 SV=1
A7SXG0	Predicted protein OS=Nematostella vectensis OX=45351 GN=v1g219007 PE=4 SV=1
A7SXG5	Predicted protein OS=Nematostella vectensis OX=45351 GN=v1g219029 PE=3 SV=1
A7SYL3	Predicted protein OS=Nematostella vectensis OX=45351 GN=v1g219557 PE=3 SV=1
A7SZ14	Predicted protein OS=Nematostella vectensis OX=45351 GN=v1g219782 PE=3 SV=1
A7SZ75	Predicted protein OS=Nematostella vectensis OX=45351 GN=v1g219848 PE=3 SV=1
A7SZI3	Predicted protein OS=Nematostella vectensis OX=45351 GN=v1g219987 PE=4 SV=1
A7SZQ7	Predicted protein OS=Nematostella vectensis OX=45351 GN=v1g220068 PE=4 SV=1
A7SZS3	Predicted protein OS=Nematostella vectensis OX=45351 GN=v1g220085 PE=3 SV=1
A7T010	Predicted protein OS=Nematostella vectensis OX=45351 GN=v1g220205 PE=4 SV=1
A7T033	Predicted protein OS=Nematostella vectensis OX=45351 GN=v1g220243 PE=4 SV=1
A7T073	Predicted protein OS=Nematostella vectensis OX=45351 GN=v1g220309 PE=4 SV=1
A7T0F6	Predicted protein OS=Nematostella vectensis OX=45351 GN=v1g220404 PE=4 SV=1
A7T0L7	Predicted protein OS=Nematostella vectensis OX=45351 GN=v1g220488 PE=4 SV=1
A7T1Q0	Predicted protein OS=Nematostella vectensis OX=45351 GN=v1g221025 PE=3 SV=1
A7T1T5	Predicted protein OS=Nematostella vectensis OX=45351 GN=v1g221063 PE=4 SV=1
A7T1V7	Predicted protein OS=Nematostella vectensis OX=45351 GN=v1g221080 PE=4 SV=1
A7T1Y8	Predicted protein OS=Nematostella vectensis OX=45351 GN=v1g221117 PE=4 SV=1
A7T225	Predicted protein OS=Nematostella vectensis OX=45351 GN=v1g221173 PE=4 SV=1
A7T2A4	Predicted protein OS=Nematostella vectensis OX=45351 GN=v1g221287 PE=4 SV=1
A7T2A8	Predicted protein OS=Nematostella vectensis OX=45351 GN=v1g221291 PE=4 SV=1
A7T2K9	Predicted protein OS=Nematostella vectensis OX=45351 GN=v1g221433 PE=4 SV=1
A7T2M8	Predicted protein OS=Nematostella vectensis OX=45351 GN=v1g221467 PE=4 SV=1
A7T324	Predicted protein OS=Nematostella vectensis OX=45351 GN=v1g221619 PE=4 SV=1
A7T350	Predicted protein OS=Nematostella vectensis OX=45351 GN=v1g221655 PE=4 SV=1
A7T3A5	Predicted protein OS=Nematostella vectensis OX=45351 GN=v1g221736 PE=4 SV=1
A7T476	Predicted protein OS=Nematostella vectensis OX=45351 GN=v1g222088 PE=4 SV=1
A7T4G9	Predicted protein OS=Nematostella vectensis OX=45351 GN=v1g222206 PE=4 SV=1
A7T4H0	Predicted protein OS=Nematostella vectensis OX=45351 GN=v1g222210 PE=4 SV=1
A7T4U3	Predicted protein OS=Nematostella vectensis OX=45351 GN=v1g222341 PE=4 SV=1
A7T5N6	Predicted protein OS=Nematostella vectensis OX=45351 GN=v1g222670 PE=4 SV=1
A7T5R3	Predicted protein OS=Nematostella vectensis OX=45351 GN=v1g222694 PE=4 SV=1
A7T672	Predicted protein OS=Nematostella vectensis OX=45351 GN=v1g222889 PE=4 SV=1
A7T688	Predicted protein OS=Nematostella vectensis OX=45351 GN=v1g222913 PE=4 SV=1
A7T6J3	Predicted protein OS=Nematostella vectensis OX=45351 GN=v1g223033 PE=4 SV=1
A7T7V2	Predicted protein OS=Nematostella vectensis OX=45351 GN=v1g223532 PE=4 SV=1
A7T811	Predicted protein OS=Nematostella vectensis OX=45351 GN=v1g223602 PE=4 SV=1
A7T898	Predicted protein OS=Nematostella vectensis OX=45351 GN=v1g223708 PE=4 SV=1
A7T8E0	Predicted protein OS=Nematostella vectensis OX=45351 GN=v1g223756 PE=4 SV=1
A7T9D9	Predicted protein OS=Nematostella vectensis OX=45351 GN=v1g224137 PE=4 SV=1
A7T9L5	Predicted protein OS=Nematostella vectensis OX=45351 GN=v1g224210 PE=4 SV=1
A7TAL8	Predicted protein OS=Nematostella vectensis OX=45351 GN=v1g224560 PE=4 SV=1
A7TAM8	Predicted protein OS=Nematostella vectensis OX=45351 GN=v1g224574 PE=3 SV=1
A7TC15	Predicted protein OS=Nematostella vectensis OX=45351 GN=v1g225036 PE=4 SV=1
A8DVQ6	Predicted protein OS=Nematostella vectensis OX=45351 GN=v1g225779 PE=3 SV=1
A8DW18	Predicted protein OS=Nematostella vectensis OX=45351 GN=v1g225879 PE=4 SV=1
A7RI41	Predicted protein OS=Nematostella vectensis OX=45351 GN=v1g226223 PE=3 SV=1
A7RY60	Predicted protein OS=Nematostella vectensis OX=45351 GN=v1g226633 PE=3 SV=1
A7RYP7	Predicted protein OS=Nematostella vectensis OX=45351 GN=v1g226653 PE=4 SV=1
A7S667	Predicted protein OS=Nematostella vectensis OX=45351 GN=v1g226879 PE=3 SV=1
A7SA87	Predicted protein OS=Nematostella vectensis OX=45351 GN=v1g226991 PE=3 SV=1
A7SJ69	Predicted protein OS=Nematostella vectensis OX=45351 GN=v1g227249 PE=4 SV=1
A7RER3	Predicted protein OS=Nematostella vectensis OX=45351 GN=v1g227824 PE=4 SV=1
A7RGV9	Predicted protein OS=Nematostella vectensis OX=45351 GN=v1g227966 PE=4 SV=1
A7RIS0	Predicted protein OS=Nematostella vectensis OX=45351 GN=v1g228101 PE=4 SV=1
A7RM71	Predicted protein OS=Nematostella vectensis OX=45351 GN=v1g228311 PE=3 SV=1
A7RMB4	Predicted protein OS=Nematostella vectensis OX=45351 GN=v1g228321 PE=4 SV=1
A7RRD6	Predicted protein OS=Nematostella vectensis OX=45351 GN=v1g228581 PE=3 SV=1
A7RVK9	Predicted protein OS=Nematostella vectensis OX=45351 GN=v1g228836 PE=4 SV=1
A7RVQ5	Predicted protein OS=Nematostella vectensis OX=45351 GN=v1g228848 PE=3 SV=1
A7RXS1	Predicted protein OS=Nematostella vectensis OX=45351 GN=v1g228964 PE=3 SV=1
A7S0K6	Predicted protein OS=Nematostella vectensis OX=45351 GN=v1g229120 PE=4 SV=1
A7S0M2	Predicted protein OS=Nematostella vectensis OX=45351 GN=v1g229125 PE=4 SV=1
A7S1T2	Predicted protein OS=Nematostella vectensis OX=45351 GN=v1g229200 PE=3 SV=1
A7S3Z5	Predicted protein OS=Nematostella vectensis OX=45351 GN=v1g229337 PE=3 SV=1
A7S730	Predicted protein OS=Nematostella vectensis OX=45351 GN=v1g229557 PE=4 SV=1
A7S9U5	Predicted protein OS=Nematostella vectensis OX=45351 GN=v1g229729 PE=3 SV=1
A7SCW3	Predicted protein OS=Nematostella vectensis OX=45351 GN=v1g229912 PE=4 SV=1
A7SEX7	Predicted protein OS=Nematostella vectensis OX=45351 GN=v1g230057 PE=3 SV=1
A7SLP2	Predicted protein OS=Nematostella vectensis OX=45351 GN=v1g230488 PE=4 SV=1
A7SM87	Predicted protein OS=Nematostella vectensis OX=45351 GN=v1g230518 PE=3 SV=1
A7SS28	Predicted protein OS=Nematostella vectensis OX=45351 GN=v1g230812 PE=3 SV=1
A7SV28	Predicted protein OS=Nematostella vectensis OX=45351 GN=v1g230980 PE=3 SV=1
A7SW65	Predicted protein OS=Nematostella vectensis OX=45351 GN=v1g231022 PE=4 SV=1
A7SWG9	Predicted protein OS=Nematostella vectensis OX=45351 GN=v1g231045 PE=4 SV=1
A7SX81	Predicted protein OS=Nematostella vectensis OX=45351 GN=v1g231092 PE=4 SV=1
A7T224	Predicted protein OS=Nematostella vectensis OX=45351 GN=v1g231343 PE=3 SV=1
A7T4G2	Predicted protein OS=Nematostella vectensis OX=45351 GN=v1g231431 PE=4 SV=1
A7RHG1	Predicted protein OS=Nematostella vectensis OX=45351 GN=v1g231809 PE=4 SV=1
A7RKZ0	Predicted protein OS=Nematostella vectensis OX=45351 GN=v1g231946 PE=3 SV=1
A7RLK5	Predicted protein OS=Nematostella vectensis OX=45351 GN=v1g231967 PE=4 SV=1
A7RM36	Predicted protein OS=Nematostella vectensis OX=45351 GN=v1g231988 PE=4 SV=1
A7RMJ5	Predicted protein OS=Nematostella vectensis OX=45351 GN=v1g232013 PE=4 SV=1
A7RMJ6	Predicted protein OS=Nematostella vectensis OX=45351 GN=v1g232014 PE=4 SV=1
A7RMJ7	Predicted protein OS=Nematostella vectensis OX=45351 GN=v1g232015 PE=4 SV=1
A7RMU7	Predicted protein OS=Nematostella vectensis OX=45351 GN=v1g232024 PE=4 SV=1
A7RNR1	Predicted protein OS=Nematostella vectensis OX=45351 GN=v1g232062 PE=3 SV=1
A7RR56	Predicted protein OS=Nematostella vectensis OX=45351 GN=v1g232141 PE=3 SV=1
A7RTH6	Predicted protein OS=Nematostella vectensis OX=45351 GN=v1g232242 PE=3 SV=1
A7RUU1	Predicted protein OS=Nematostella vectensis OX=45351 GN=v1g232294 PE=4 SV=1
A7RUV4	Predicted protein OS=Nematostella vectensis OX=45351 GN=v1g232296 PE=4 SV=1
A7RX87	Predicted protein OS=Nematostella vectensis OX=45351 GN=v1g232388 PE=4 SV=1
A7S0N9	Predicted protein OS=Nematostella vectensis OX=45351 GN=v1g232537 PE=4 SV=1
A7S1K8	Predicted protein OS=Nematostella vectensis OX=45351 GN=v1g232574 PE=4 SV=1
A7S1U3	Predicted protein OS=Nematostella vectensis OX=45351 GN=v1g232579 PE=4 SV=1
A7S3L6	Predicted protein OS=Nematostella vectensis OX=45351 GN=v1g232647 PE=4 SV=1
A7S562	Predicted protein OS=Nematostella vectensis OX=45351 GN=v1g232720 PE=4 SV=1
A7SCW1	Predicted protein OS=Nematostella vectensis OX=45351 GN=v1g233027 PE=4 SV=1
A7SCX6	Predicted protein OS=Nematostella vectensis OX=45351 GN=v1g233029 PE=4 SV=1
A7SDD7	Predicted protein OS=Nematostella vectensis OX=45351 GN=v1g233046 PE=4 SV=1
A7SFE9	Predicted protein OS=Nematostella vectensis OX=45351 GN=v1g233133 PE=4 SV=1
A7SFN3	Predicted protein OS=Nematostella vectensis OX=45351 GN=v1g233147 PE=3 SV=1
A7SK16	Predicted protein OS=Nematostella vectensis OX=45351 GN=v1g233305 PE=4 SV=1
A7SMA8	Predicted protein OS=Nematostella vectensis OX=45351 GN=v1g233373 PE=4 SV=1
A7SMG5	Predicted protein OS=Nematostella vectensis OX=45351 GN=v1g233380 PE=4 SV=1
A7SQQ7	Predicted protein OS=Nematostella vectensis OX=45351 GN=v1g233482 PE=3 SV=1
A7SRX8	Predicted protein OS=Nematostella vectensis OX=45351 GN=v1g233531 PE=3 SV=1
A7SXL2	Predicted protein OS=Nematostella vectensis OX=45351 GN=v1g233699 PE=4 SV=1
A8DV88	Predicted protein OS=Nematostella vectensis OX=45351 GN=v1g233852 PE=4 SV=1
A7RES3	Predicted protein OS=Nematostella vectensis OX=45351 GN=v1g233857 PE=4 SV=1
A7RFJ9	Predicted protein OS=Nematostella vectensis OX=45351 GN=v1g233881 PE=3 SV=1
A7RH92	Predicted protein OS=Nematostella vectensis OX=45351 GN=v1g233975 PE=4 SV=1
A7RHP5	Predicted protein OS=Nematostella vectensis OX=45351 GN=v1g233999 PE=3 SV=1
A7RKI8	Predicted protein OS=Nematostella vectensis OX=45351 GN=v1g234118 PE=4 SV=1
A7RNW3	Predicted protein OS=Nematostella vectensis OX=45351 GN=v1g234280 PE=4 SV=1
A7RQ98	Predicted protein OS=Nematostella vectensis OX=45351 GN=v1g234328 PE=4 SV=1
A7RS05	Predicted protein OS=Nematostella vectensis OX=45351 GN=v1g234402 PE=3 SV=1
A7RT36	Predicted protein OS=Nematostella vectensis OX=45351 GN=v1g234428 PE=3 SV=1
A7RTM1	Predicted protein OS=Nematostella vectensis OX=45351 GN=v1g234457 PE=4 SV=1
A7S156	Predicted protein OS=Nematostella vectensis OX=45351 GN=v1g234745 PE=3 SV=1
A7S2A5	Predicted protein OS=Nematostella vectensis OX=45351 GN=v1g234790 PE=4 SV=1
A7S364	Predicted protein OS=Nematostella vectensis OX=45351 GN=v1g234845 PE=3 SV=1
A7S513	Predicted protein OS=Nematostella vectensis OX=45351 GN=v1g234931 PE=3 SV=1
A7S5T4	Predicted protein OS=Nematostella vectensis OX=45351 GN=v1g234969 PE=3 SV=1
A7SDD6	Predicted protein OS=Nematostella vectensis OX=45351 GN=v1g235302 PE=3 SV=1
A7SDG1	Predicted protein OS=Nematostella vectensis OX=45351 GN=v1g235305 PE=3 SV=1
A7SE81	Predicted protein OS=Nematostella vectensis OX=45351 GN=v1g235331 PE=3 SV=1
A7SG06	Predicted protein OS=Nematostella vectensis OX=45351 GN=v1g235418 PE=3 SV=1
A7SHU5	Predicted protein OS=Nematostella vectensis OX=45351 GN=v1g235494 PE=3 SV=1
A7SKV7	Predicted protein OS=Nematostella vectensis OX=45351 GN=v1g235624 PE=4 SV=1
A7SLI5	Predicted protein OS=Nematostella vectensis OX=45351 GN=v1g235656 PE=4 SV=1
A7SRR4	Predicted protein OS=Nematostella vectensis OX=45351 GN=v1g235862 PE=3 SV=1
A7SSG0	Predicted protein OS=Nematostella vectensis OX=45351 GN=v1g235892 PE=4 SV=1
A7ST15	Predicted protein OS=Nematostella vectensis OX=45351 GN=v1g235919 PE=3 SV=1
A7SYX4	Predicted protein OS=Nematostella vectensis OX=45351 GN=v1g236106 PE=3 SV=1
A7RGT2	Predicted protein OS=Nematostella vectensis OX=45351 GN=v1g236320 PE=3 SV=1
A7RHF5	Predicted protein OS=Nematostella vectensis OX=45351 GN=v1g236342 PE=4 SV=1
A7RJH9	Predicted protein OS=Nematostella vectensis OX=45351 GN=v1g236404 PE=3 SV=1
A7RLS1	Predicted protein OS=Nematostella vectensis OX=45351 GN=v1g236455 PE=4 SV=1
A7RMA3	Predicted protein OS=Nematostella vectensis OX=45351 GN=v1g236477 PE=3 SV=1
A7RPP0	Predicted protein OS=Nematostella vectensis OX=45351 GN=v1g236522 PE=4 SV=1
A7RPP8	Predicted protein OS=Nematostella vectensis OX=45351 GN=v1g236523 PE=4 SV=1
A7RRG9	Predicted protein OS=Nematostella vectensis OX=45351 GN=v1g236562 PE=4 SV=1
A7RRJ5	Predicted protein OS=Nematostella vectensis OX=45351 GN=v1g236565 PE=4 SV=1
A7RRQ2	Predicted protein OS=Nematostella vectensis OX=45351 GN=v1g236573 PE=4 SV=1
A7RRT7	Predicted protein OS=Nematostella vectensis OX=45351 GN=v1g236578 PE=4 SV=1
A7RRY6	Predicted protein OS=Nematostella vectensis OX=45351 GN=v1g236584 PE=4 SV=1
A7RT47	Predicted protein OS=Nematostella vectensis OX=45351 GN=v1g236609 PE=4 SV=1
A7RT65	Predicted protein OS=Nematostella vectensis OX=45351 GN=v1g236613 PE=3 SV=1
A7RTT8	Predicted protein OS=Nematostella vectensis OX=45351 GN=v1g236630 PE=3 SV=1
A7RUR8	Predicted protein OS=Nematostella vectensis OX=45351 GN=v1g236657 PE=3 SV=1
A7RUS8	Predicted protein OS=Nematostella vectensis OX=45351 GN=v1g236658 PE=4 SV=1
A7RVJ1	Predicted protein OS=Nematostella vectensis OX=45351 GN=v1g236681 PE=3 SV=1
A7RVT6	Predicted protein OS=Nematostella vectensis OX=45351 GN=v1g236688 PE=4 SV=1
A7RX67	Predicted protein OS=Nematostella vectensis OX=45351 GN=v1g236715 PE=3 SV=1
A7RXR8	Predicted protein OS=Nematostella vectensis OX=45351 GN=v1g236730 PE=3 SV=1
A7RY62	Predicted protein OS=Nematostella vectensis OX=45351 GN=v1g236739 PE=3 SV=1
A7RYG0	Predicted protein OS=Nematostella vectensis OX=45351 GN=v1g236748 PE=4 SV=1
A7RYL2	Predicted protein OS=Nematostella vectensis OX=45351 GN=v1g236753 PE=3 SV=1
A7RYS8	Predicted protein OS=Nematostella vectensis OX=45351 GN=v1g236760 PE=3 SV=1
A7RZ60	Predicted protein OS=Nematostella vectensis OX=45351 GN=v1g236771 PE=4 SV=1
A7RZK7	Predicted protein OS=Nematostella vectensis OX=45351 GN=v1g236778 PE=3 SV=1
A7S0H8	Predicted protein OS=Nematostella vectensis OX=45351 GN=v1g236810 PE=3 SV=1
A7S1C6	Predicted protein OS=Nematostella vectensis OX=45351 GN=v1g236828 PE=4 SV=1
A7S1I9	Predicted protein OS=Nematostella vectensis OX=45351 GN=v1g236834 PE=3 SV=1
A7S2N6	Predicted protein OS=Nematostella vectensis OX=45351 GN=v1g236875 PE=3 SV=1
A7S4X7	Predicted protein OS=Nematostella vectensis OX=45351 GN=v1g236923 PE=3 SV=1
A7S8B5	Predicted protein OS=Nematostella vectensis OX=45351 GN=v1g237021 PE=4 SV=1
A7SA43	Predicted protein OS=Nematostella vectensis OX=45351 GN=v1g237060 PE=3 SV=1
A7SA71	Predicted protein OS=Nematostella vectensis OX=45351 GN=v1g237062 PE=4 SV=1
A7SAS6	Predicted protein OS=Nematostella vectensis OX=45351 GN=v1g237075 PE=3 SV=1
A7SDX6	Predicted protein OS=Nematostella vectensis OX=45351 GN=v1g237148 PE=3 SV=1
A7SG87	Predicted protein OS=Nematostella vectensis OX=45351 GN=v1g237233 PE=4 SV=1
Q6S5G5	Predicted protein OS=Nematostella vectensis OX=45351 GN=v1g237239 PE=2 SV=1
A7SGR6	Predicted protein OS=Nematostella vectensis OX=45351 GN=v1g237252 PE=4 SV=1
A7SHW6	Predicted protein OS=Nematostella vectensis OX=45351 GN=v1g237274 PE=3 SV=1
A7SJY7	Predicted protein OS=Nematostella vectensis OX=45351 GN=v1g237320 PE=3 SV=1
A7SKP4	Predicted protein OS=Nematostella vectensis OX=45351 GN=v1g237340 PE=4 SV=1
A7SLX8	Predicted protein OS=Nematostella vectensis OX=45351 GN=v1g237361 PE=4 SV=1
A7SNQ5	Predicted protein OS=Nematostella vectensis OX=45351 GN=v1g237392 PE=4 SV=1
A7SPH1	Predicted protein OS=Nematostella vectensis OX=45351 GN=v1g237410 PE=4 SV=1
A7SRI7	Predicted protein OS=Nematostella vectensis OX=45351 GN=v1g237453 PE=4 SV=1
A7SSE4	Predicted protein OS=Nematostella vectensis OX=45351 GN=v1g237474 PE=3 SV=1
A7SSL6	Predicted protein OS=Nematostella vectensis OX=45351 GN=v1g237480 PE=4 SV=1
A7SSP6	Predicted protein OS=Nematostella vectensis OX=45351 GN=v1g237483 PE=4 SV=1
A7SU78	Predicted protein OS=Nematostella vectensis OX=45351 GN=v1g237519 PE=3 SV=1
A7SVE8	Predicted protein OS=Nematostella vectensis OX=45351 GN=v1g237547 PE=3 SV=1
A7SWW7	Predicted protein OS=Nematostella vectensis OX=45351 GN=v1g237574 PE=4 SV=1
A7SX22	Predicted protein OS=Nematostella vectensis OX=45351 GN=v1g237576 PE=3 SV=1
A7SZ61	Predicted protein OS=Nematostella vectensis OX=45351 GN=v1g237610 PE=3 SV=1
A7SZB9	Predicted protein OS=Nematostella vectensis OX=45351 GN=v1g237612 PE=3 SV=1
A7T0L2	Predicted protein OS=Nematostella vectensis OX=45351 GN=v1g237634 PE=4 SV=1
A7T105	Predicted protein OS=Nematostella vectensis OX=45351 GN=v1g237640 PE=3 SV=1
A7RET6	Predicted protein OS=Nematostella vectensis OX=45351 GN=v1g237717 PE=4 SV=1
A7REV6	Predicted protein OS=Nematostella vectensis OX=45351 GN=v1g237728 PE=4 SV=1
A7REY0	Predicted protein OS=Nematostella vectensis OX=45351 GN=v1g237749 PE=4 SV=1
A7RF99	Predicted protein OS=Nematostella vectensis OX=45351 GN=v1g237806 PE=3 SV=1
A7RFF6	Predicted protein OS=Nematostella vectensis OX=45351 GN=v1g237843 PE=4 SV=1
A7RFT1	Predicted protein OS=Nematostella vectensis OX=45351 GN=v1g237924 PE=4 SV=1
A7RFX5	Predicted protein OS=Nematostella vectensis OX=45351 GN=v1g237955 PE=3 SV=1
A7RFZ6	Predicted protein OS=Nematostella vectensis OX=45351 GN=v1g237970 PE=4 SV=1
A7RG62	Predicted protein OS=Nematostella vectensis OX=45351 GN=v1g238021 PE=4 SV=1
A7RG78	Predicted protein OS=Nematostella vectensis OX=45351 GN=v1g238031 PE=4 SV=1
A7RG96	Predicted protein OS=Nematostella vectensis OX=45351 GN=v1g238047 PE=4 SV=1
[truncated: 677 more rows]

## Sheet: Table S3_Proteomics_Clusters
Cluster 1 (High Native Only)				Cluster 2 (High Native and non Native)				Cluster 3 (High Native and Control)				Cluster 4 (High non Native Only)				Cluster 5 (High non Native and Control)				Control Only
Uniprot Accession	Uniprot Annotation	KEGG Annotation (Blast KOALA)	STRING Annotation	Uniprot Accession	Uniprot Annotation	KEGG Annotation (Blast KOALA)	STRING Annotation	Uniprot Accession	Uniprot Annotation	KEGG Annotation (Blast KOALA)	STRING Annotation	Uniprot Accession	Uniprot Annotation	KEGG Annotation (Blast KOALA)	STRING Annotation	Uniprot Accession	Uniprot Annotation	KEGG Annotation (Blast KOALA)	STRING Annotation	Uniprot Accession	Uniprot Annotation	KEGG Annotation (Blast KOALA)	STRING Annotation
A7SIL7	26S proteasome non-ATPase regulatory subunit 8 OS=Nematostella vectensis OX=45351 GN=v1g190193 PE=3 SV=1			A7SUA4	26S proteasome non-ATPase regulatory subunit 1 OS=Nematostella vectensis OX=45351 GN=v1g193603 PE=3 SV=1			A7RHS8	10 kDa chaperonin OS=Nematostella vectensis OX=45351 GN=v1g178050 PE=3 SV=1			A7RQD8	60S ribosomal protein L30 OS=Nematostella vectensis OX=45351 GN=v1g180772 PE=3 SV=1			A7S1S6	1,4-alpha-glucan branching enzyme OS=Nematostella vectensis OX=45351 GN=v1g165393 PE=3 SV=1			T: Accession	T: Description
A7RR70	60S ribosomal protein L35a OS=Nematostella vectensis OX=45351 GN=v1g240098 PE=3 SV=1			A7T7B4	AICAR transformylase/inosine monophosphate cyclohydrolase (Fragment) OS=Nematostella vectensis OX=45351 GN=v1g60966 PE=3 SV=1			A7SFM1	40S ribosomal protein S24 OS=Nematostella vectensis OX=45351 GN=v1g244934 PE=3 SV=1			A7RUV9	Aminopeptidase OS=Nematostella vectensis OX=45351 GN=v1g240852 PE=3 SV=1			A7SYY2	26S proteasome non-ATPase regulatory subunit 4 OS=Nematostella vectensis OX=45351 GN=v1g236108 PE=3 SV=1			A7SK96	40S ribosomal protein S12 OS=Nematostella vectensis OX=45351 GN=v1g171532 PE=3 SV=1
A7RRG4	Actin-related protein 2/3 complex subunit 4 OS=Nematostella vectensis OX=45351 GN=v1g236559 PE=3 SV=1			A7SUH3	Allantoate amidinohydrolase OS=Nematostella vectensis OX=45351 GN=v1g235970 PE=3 SV=1			A7T856	40S ribosomal protein S28 (Fragment) OS=Nematostella vectensis OX=45351 GN=v1g149719 PE=3 SV=1			A7T6G0	Annexin OS=Nematostella vectensis OX=45351 GN=v1g195888 PE=3 SV=1			A7SZN8	26S proteasome non-ATPase regulatory subunit 6 OS=Nematostella vectensis OX=45351 GN=v1g195005 PE=3 SV=1			A7SES9	40S ribosomal protein S20 OS=Nematostella vectensis OX=45351 GN=v1g188999 PE=3 SV=1
A7SHU9	Alanine--tRNA ligase OS=Nematostella vectensis OX=45351 GN=v1g189992 PE=3 SV=1			A7REV0	Anoctamin (Fragment) OS=Nematostella vectensis OX=45351 GN=v1g79192 PE=3 SV=1			A7S249	40S ribosomal protein S29 OS=Nematostella vectensis OX=45351 GN=v1g229213 PE=3 SV=1			A7RZV8	Arginase OS=Nematostella vectensis OX=45351 GN=v1g241846 PE=3 SV=1			A7SIL7	26S proteasome non-ATPase regulatory subunit 8 OS=Nematostella vectensis OX=45351 GN=v1g190193 PE=3 SV=1			A7SKY1	40S ribosomal protein S25 OS=Nematostella vectensis OX=45351 GN=v1g190935 PE=3 SV=1
A7RH33	AP-2 complex subunit alpha OS=Nematostella vectensis OX=45351 GN=v1g236331 PE=3 SV=1			A7SPW2	Aspartate aminotransferase OS=Nematostella vectensis OX=45351 GN=v1g246662 PE=3 SV=1			A7SA67	Actin-related protein 2/3 complex subunit 3 OS=Nematostella vectensis OX=45351 GN=v1g235176 PE=3 SV=1			A7RMR5	Aspartate aminotransferase OS=Nematostella vectensis OX=45351 GN=v1g86861 PE=3 SV=1			A7RHX8	3-hydroxyisobutyrate dehydrogenase OS=Nematostella vectensis OX=45351 GN=v1g178116 PE=3 SV=1			A7RLY2	60S acidic ribosomal protein P2 OS=Nematostella vectensis OX=45351 GN=v1g160310 PE=3 SV=1
A7RQC0	Arachidonate--CoA ligase OS=Nematostella vectensis OX=45351 GN=v1g239941 PE=4 SV=1			A7RMK9	ATP-dependent RNA helicase DDX1 OS=Nematostella vectensis OX=45351 GN=v1g199320 PE=3 SV=1			A7SY95	Aminomethyltransferase (Fragment) OS=Nematostella vectensis OX=45351 GN=v1g137645 PE=3 SV=1			A7SHQ3	Cilia- and flagella-associated protein 36 OS=Nematostella vectensis OX=45351 GN=v1g212454 PE=3 SV=1			A7RL80	40S ribosomal protein S11 OS=Nematostella vectensis OX=45351 GN=v1g239074 PE=3 SV=1			A7S405	60S ribosomal protein L13 OS=Nematostella vectensis OX=45351 GN=v1g242697 PE=3 SV=1
A7RER2	Arginine kinase 1 OS=Nematostella vectensis OX=45351 GN=v1g79604 PE=2 SV=1			A7S9V7	Bardet-Biedl syndrome 2 protein homolog OS=Nematostella vectensis OX=45351 GN=v1g235159 PE=4 SV=1			A7SKY7	Angiotensin-converting enzyme OS=Nematostella vectensis OX=45351 GN=v1g190941 PE=3 SV=1			A7S636	Complex III subunit 8 OS=Nematostella vectensis OX=45351 GN=v1g236959 PE=3 SV=1			A7SQP1	40S ribosomal protein S13 OS=Nematostella vectensis OX=45351 GN=v1g235818 PE=3 SV=1			A7SCX9	60S ribosomal protein L34 OS=Nematostella vectensis OX=45351 GN=v1g237122 PE=3 SV=1
A7S644	Arginyl-tRNA synthetase OS=Nematostella vectensis OX=45351 GN=v1g229489 PE=3 SV=1			A7RRU7	Diadenosine tetraphosphate synthetase OS=Nematostella vectensis OX=45351 GN=v1g162025 PE=3 SV=1			A7RRZ8	ATP-dependent (S)-NAD(P)H-hydrate dehydratase OS=Nematostella vectensis OX=45351 GN=v1g162096 PE=3 SV=1			A7RYI9	Cystathionine beta-synthase OS=Nematostella vectensis OX=45351 GN=v1g204029 PE=3 SV=1			A7RS93	40S ribosomal protein S15 OS=Nematostella vectensis OX=45351 GN=v1g181408 PE=3 SV=1			A7SQT2	60S ribosomal protein L35 OS=Nematostella vectensis OX=45351 GN=v1g246818 PE=3 SV=1
A7SPP0	ATP synthase subunit beta OS=Nematostella vectensis OX=45351 GN=v1g230667 PE=3 SV=1			A8DW37	DNA-directed RNA polymerase (Fragment) OS=Nematostella vectensis OX=45351 GN=v1g225894 PE=4 SV=1			A7RG51	C-1-tetrahydrofolate synthase, cytoplasmic OS=Nematostella vectensis OX=45351 GN=v1g158170 PE=3 SV=1			A7SIT9	DNA polymerase epsilon catalytic subunit (Fragment) OS=Nematostella vectensis OX=45351 GN=v1g119951 PE=3 SV=1			A7SH82	40S ribosomal protein S18 OS=Nematostella vectensis OX=45351 GN=v1g245261 PE=3 SV=1			A7SNU0	60S ribosomal protein L36 OS=Nematostella vectensis OX=45351 GN=v1g191823 PE=3 SV=1
A7S762	Carbonic anhydrase (Fragment) OS=Nematostella vectensis OX=45351 GN=v1g107048 PE=3 SV=1			A7T993	DNA-directed RNA polymerase subunit (Fragment) OS=Nematostella vectensis OX=45351 GN=v1g70504 PE=3 SV=1			A7RN07	Carboxylic ester hydrolase (Fragment) OS=Nematostella vectensis OX=45351 GN=v1g31599 PE=3 SV=1			A7RHR8	Dolichyl-diphosphooligosaccharide--protein glycotransferase OS=Nematostella vectensis OX=45351 GN=v1g238356 PE=3 SV=1			A7RJJ7	40S ribosomal protein S2 OS=Nematostella vectensis OX=45351 GN=v1g178799 PE=3 SV=1			A7RKV4	60S ribosomal protein L38 OS=Nematostella vectensis OX=45351 GN=v1g226298 PE=3 SV=1
A7S717	Carbonic anhydrase OS=Nematostella vectensis OX=45351 GN=v1g186479 PE=3 SV=1			A7S8F9	DNA-directed RNA polymerase subunit OS=Nematostella vectensis OX=45351 GN=v1g229643 PE=3 SV=1			A7SZR4	Clathrin light chain OS=Nematostella vectensis OX=45351 GN=v1g175828 PE=3 SV=1			A7RRH9	Dynein light intermediate chain (Fragment) OS=Nematostella vectensis OX=45351 GN=v1g40628 PE=3 SV=1			A7RFJ1	40S ribosomal protein S23 OS=Nematostella vectensis OX=45351 GN=v1g177191 PE=3 SV=1			A7S6P2	Acetyl-CoA C-myristoyltransferase OS=Nematostella vectensis OX=45351 GN=v1g207642 PE=3 SV=1
A7SMT1	CCT-beta OS=Nematostella vectensis OX=45351 GN=v1g191440 PE=3 SV=1			A7SN34	Dynamin-1-like protein OS=Nematostella vectensis OX=45351 GN=v1g191557 PE=3 SV=1			A7SLN0	COP9 signalosome complex subunit 6 OS=Nematostella vectensis OX=45351 GN=v1g122914 PE=3 SV=1			A7S9Q6	E2 ubiquitin-conjugating enzyme OS=Nematostella vectensis OX=45351 GN=v1g235155 PE=3 SV=1			A7S494	40S ribosomal protein S27 OS=Nematostella vectensis OX=45351 GN=v1g234893 PE=3 SV=1			A7RQH5	Adenylyl cyclase-associated protein OS=Nematostella vectensis OX=45351 GN=v1g161560 PE=3 SV=1
A7RI62	Citrate synthase (Fragment) OS=Nematostella vectensis OX=45351 GN=v1g82156 PE=3 SV=1			A7S8T2	Elongation factor Tu OS=Nematostella vectensis OX=45351 GN=v1g229673 PE=3 SV=1			A7RFT6	Dihydrolipoyl dehydrogenase OS=Nematostella vectensis OX=45351 GN=v1g177276 PE=3 SV=1			A7S534	Eukaryotic translation initiation factor 2 subunit 1 OS=Nematostella vectensis OX=45351 GN=v1g185797 PE=3 SV=1			A7S3J7	40S ribosomal protein S3a OS=Nematostella vectensis OX=45351 GN=v1g242621 PE=3 SV=1			A7RHL4	Aspartyl aminopeptidase OS=Nematostella vectensis OX=45351 GN=v1g238321 PE=3 SV=1
A7RNG8	Coiled-coil domain-containing protein 22 homolog OS=Nematostella vectensis OX=45351 GN=v1g180167 PE=3 SV=1			A7S181	F-actin-capping protein subunit alpha OS=Nematostella vectensis OX=45351 GN=v1g242138 PE=3 SV=1			A7T0N1	Eukaryotic translation initiation factor 5A OS=Nematostella vectensis OX=45351 GN=v1g176002 PE=3 SV=1			A7RUD3	Fascin OS=Nematostella vectensis OX=45351 GN=v1g182068 PE=3 SV=1			A7SRV8	40S ribosomal protein S4 OS=Nematostella vectensis OX=45351 GN=v1g173646 PE=3 SV=1			A7T3N0	Beta-hexosaminidase OS=Nematostella vectensis OX=45351 GN=v1g248668 PE=3 SV=1
A7SX99	Cytochrome c oxidase polypeptide Va OS=Nematostella vectensis OX=45351 GN=v1g175253 PE=3 SV=1			A7SXV0	Glutamine--fructose-6-phosphate transaminase (isomerizing) OS=Nematostella vectensis OX=45351 GN=v1g175439 PE=4 SV=1			A7RWF3	GCS light chain OS=Nematostella vectensis OX=45351 GN=v1g95571 PE=3 SV=1			A7RKP9	Folate gamma-glutamyl hydrolase OS=Nematostella vectensis OX=45351 GN=v1g238967 PE=3 SV=1			A7T0C1	40S ribosomal protein S8 OS=Nematostella vectensis OX=45351 GN=v1g195152 PE=3 SV=1			A7SG27	Casein kinase II subunit beta OS=Nematostella vectensis OX=45351 GN=v1g245041 PE=3 SV=1
A7RJL7	Cytochrome c oxidase subunit OS=Nematostella vectensis OX=45351 GN=v1g236414 PE=3 SV=1			A7SWU4	GMP reductase (Fragment) OS=Nematostella vectensis OX=45351 GN=v1g227565 PE=3 SV=1			A7T0R9	GDP-D-mannose dehydratase OS=Nematostella vectensis OX=45351 GN=v1g248392 PE=3 SV=1			A7SMJ7	G protein-coupled receptor kinase OS=Nematostella vectensis OX=45351 GN=v1g246204 PE=3 SV=1			A7RIM3	4-hydroxy-2-oxoglutarate aldolase, mitochondrial OS=Nematostella vectensis OX=45351 GN=v1g82674 PE=3 SV=1			A7RKR4	Citrate hydro-lyase OS=Nematostella vectensis OX=45351 GN=v1g179073 PE=3 SV=1
A7SLH5	Deoxynucleoside triphosphate triphosphohydrolase SAMHD1 OS=Nematostella vectensis OX=45351 GN=v1g246030 PE=3 SV=1			A7RR93	HECT-type E3 ubiquitin transferase OS=Nematostella vectensis OX=45351 GN=v1g161803 PE=4 SV=1			A7SE06	Glutamate dehydrogenase OS=Nematostella vectensis OX=45351 GN=v1g169502 PE=3 SV=1			A7RQE0	Glutamate--cysteine ligase (Fragment) OS=Nematostella vectensis OX=45351 GN=v1g180776 PE=3 SV=1			A7REW3	60S ribosomal protein L12 OS=Nematostella vectensis OX=45351 GN=v1g176975 PE=3 SV=1			A7S9A4	Coatomer subunit alpha OS=Nematostella vectensis OX=45351 GN=v1g187173 PE=4 SV=1
A7SPE9	DNA replication licensing factor MCM3 OS=Nematostella vectensis OX=45351 GN=v1g215383 PE=3 SV=1			A7RV06	Ornithine carbamoyltransferase, mitochondrial OS=Nematostella vectensis OX=45351 GN=v1g182282 PE=3 SV=1			A7SNY2	Inorganic diphosphatase OS=Nematostella vectensis OX=45351 GN=v1g191879 PE=3 SV=1			A7SG05	GTP-binding nuclear protein OS=Nematostella vectensis OX=45351 GN=v1g170199 PE=3 SV=1			A7SAM6	60S ribosomal protein L14 OS=Nematostella vectensis OX=45351 GN=v1g244001 PE=3 SV=1			A7RQN7	Dihydrolipoamide acetyltransferase component of pyruvate dehydrogenase complex (Fragment) OS=Nematostella vectensis OX=45351 GN=v1g90374 PE=3 SV=1
A7SK48	Eukaryotic translation initiation factor 3 subunit A OS=Nematostella vectensis OX=45351 GN=v1g190699 PE=3 SV=2			A7SRS8	Peptidylprolyl isomerase OS=Nematostella vectensis OX=45351 GN=v1g129106 PE=4 SV=1			A7RZN5	Metalloendopeptidase OS=Nematostella vectensis OX=45351 GN=v1g98917 PE=4 SV=1			A7S2F7	Isocitrate dehydrogenase [NADP] OS=Nematostella vectensis OX=45351 GN=v1g205753 PE=3 SV=1			A7RSF0	60S ribosomal protein L17 OS=Nematostella vectensis OX=45351 GN=v1g162224 PE=3 SV=1			A7SRQ1	Electron transfer flavoprotein subunit beta OS=Nematostella vectensis OX=45351 GN=v1g192806 PE=3 SV=1
A7S6F3	Glutamate dehydrogenase OS=Nematostella vectensis OX=45351 GN=v1g243194 PE=3 SV=1			A7RFA1	Phosphotriesterase-related protein OS=Nematostella vectensis OX=45351 GN=v1g177083 PE=3 SV=1			A7RT53	NADH dehydrogenase [ubiquinone] 1 alpha subcomplex subunit 12 OS=Nematostella vectensis OX=45351 GN=v1g181597 PE=3 SV=1			A7T0N0	Leucine zipper and CTNNBIP1 domain-containing protein OS=Nematostella vectensis OX=45351 GN=v1g175999 PE=3 SV=1			A7SBD1	60S ribosomal protein L21 OS=Nematostella vectensis OX=45351 GN=v1g237086 PE=3 SV=1			A7RYC0	Glutathione reductase OS=Nematostella vectensis OX=45351 GN=v1g164144 PE=3 SV=1
A7S183	Glutathione transferase OS=Nematostella vectensis OX=45351 GN=v1g184426 PE=3 SV=1			A7S362	Predicted protein (Fragment) OS=Nematostella vectensis OX=45351 GN=v1g102786 PE=4 SV=1		Perlucin-like protein; Predicted protein	A7SXN2	Peptidyl-prolyl cis-trans isomerase OS=Nematostella vectensis OX=45351 GN=v1g237586 PE=3 SV=1			A7S0T1	Mab21-like 2 OS=Nematostella vectensis OX=45351 GN=v1g242056 PE=2 SV=1			A7RUW3	60S ribosomal protein L23 (Fragment) OS=Nematostella vectensis OX=45351 GN=v1g94285 PE=3 SV=1			A7RFI0	Late endosomal/lysosomal adaptor and MAPK and MTOR activator 1 OS=Nematostella vectensis OX=45351 GN=v1g237860 PE=3 SV=1
A7SSQ7	Glycine N-methyltransferase OS=Nematostella vectensis OX=45351 GN=v1g173936 PE=3 SV=1			A7S3J2	Predicted protein (Fragment) OS=Nematostella vectensis OX=45351 GN=v1g102986 PE=4 SV=1		2-aminomuconic semialdehyde dehydrogenase; Predicted protein	A7S119	Predicted protein (Fragment) OS=Nematostella vectensis OX=45351 GN=v1g100451 PE=3 SV=1		Predicted protein; Belongs to the peptidase C14A family	A7SRZ0	Malic enzyme OS=Nematostella vectensis OX=45351 GN=v1g173675 PE=3 SV=1			A7S072	60S ribosomal protein L27 OS=Nematostella vectensis OX=45351 GN=v1g234712 PE=3 SV=1			A7SS27	Leukotriene A(4) hydrolase OS=Nematostella vectensis OX=45351 GN=v1g247046 PE=3 SV=1
A7RFA3	Histone deacetylase (Fragment) OS=Nematostella vectensis OX=45351 GN=v1g79092 PE=3 SV=1			A7S6J9	Predicted protein (Fragment) OS=Nematostella vectensis OX=45351 GN=v1g106465 PE=4 SV=1		Leucine-rich repeat and calponin homology domain-containing protein 2; Predicted protein	A7S4Z2	Predicted protein (Fragment) OS=Nematostella vectensis OX=45351 GN=v1g104847 PE=3 SV=1	ATPeV1D, ATP6M; V-type H+-transporting ATPase subunit D	V-type h+-transporting atpase subunit d; Predicted protein	A7RH94	Metalloendopeptidase (Fragment) OS=Nematostella vectensis OX=45351 GN=v1g81453 PE=4 SV=1			A7RLF6	60S ribosomal protein L27a (Fragment) OS=Nematostella vectensis OX=45351 GN=v1g85854 PE=3 SV=1			A7RTS0	NADH dehydrogenase [ubiquinone] 1 beta subcomplex subunit 7 OS=Nematostella vectensis OX=45351 GN=v1g232250 PE=3 SV=1
A7RRK9	Leucine zipper transcription factor-like protein 1 (Fragment) OS=Nematostella vectensis OX=45351 GN=v1g91032 PE=3 SV=1			A7SKL9	Predicted protein (Fragment) OS=Nematostella vectensis OX=45351 GN=v1g121800 PE=4 SV=1	CTNNB1; catenin beta 1	Predicted protein	A7S6X5	Predicted protein (Fragment) OS=Nematostella vectensis OX=45351 GN=v1g107027 PE=4 SV=1		Very low-density lipoprotein receptor; Predicted protein	A7SNU3	Nicalin OS=Nematostella vectensis OX=45351 GN=v1g191831 PE=3 SV=1			A7RYT2	60S ribosomal protein L28 OS=Nematostella vectensis OX=45351 GN=v1g236761 PE=3 SV=1			A7S548	Paxillin (Fragment) OS=Nematostella vectensis OX=45351 GN=v1g104924 PE=4 SV=1
A7RM90	Malate synthase OS=Nematostella vectensis OX=45351 GN=v1g160432 PE=3 SV=1			A7SL99	Predicted protein (Fragment) OS=Nematostella vectensis OX=45351 GN=v1g122369 PE=4 SV=1	ENPP5; ectonucleotide pyrophosphatase/phosphodiesterase family member 5 [EC:3.1.-.-]	Ectonucleotide pyrophosphatase/phosphodiesterase family member 5; Predicted protein	A7SP48	Predicted protein (Fragment) OS=Nematostella vectensis OX=45351 GN=v1g125664 PE=3 SV=1		Heme-binding protein 2-like; Predicted protein	A7S521	Non-specific serine/threonine protein kinase OS=Nematostella vectensis OX=45351 GN=v1g232710 PE=3 SV=1			A7S786	60S ribosomal protein L31 OS=Nematostella vectensis OX=45351 GN=v1g235042 PE=3 SV=1			A7SNV4	Peptidyl-prolyl cis-trans isomerase OS=Nematostella vectensis OX=45351 GN=v1g215109 PE=3 SV=1
A7RHJ6	Methylmalonyl-CoA mutase OS=Nematostella vectensis OX=45351 GN=v1g238314 PE=3 SV=1			A7SV57	Predicted protein (Fragment) OS=Nematostella vectensis OX=45351 GN=v1g133 PE=4 SV=1	clpX, CLPX; ATP-dependent Clp protease ATP-binding subunit ClpX	Atp-dependent clp protease atp-binding subunit clpx-like, mitochondrial; Predicted protein	A7SYA7	Predicted protein (Fragment) OS=Nematostella vectensis OX=45351 GN=v1g137713 PE=4 SV=1		Splicing factor, arginine/serine-rich 7; Predicted protein	A7SFK7	Phosphodiesterase delta-like protein OS=Nematostella vectensis OX=45351 GN=v1g189274 PE=3 SV=1			A7S4S4	60S ribosomal protein L6 OS=Nematostella vectensis OX=45351 GN=v1g236919 PE=3 SV=1			A7SG98	Peroxiredoxin-5 OS=Nematostella vectensis OX=45351 GN=v1g211830 PE=3 SV=1
A7RI03	NADH-ubiquinone oxidoreductase 75 kDa subunit, mitochondrial (Fragment) OS=Nematostella vectensis OX=45351 GN=v1g226219 PE=3 SV=1			A7SXL0	Predicted protein (Fragment) OS=Nematostella vectensis OX=45351 GN=v1g136834 PE=4 SV=1	K06978; uncharacterized protein	Putative xaa-pro dipeptidyl-peptidase; Predicted protein	A7SCE7	Predicted protein (Fragment) OS=Nematostella vectensis OX=45351 GN=v1g15302 PE=3 SV=1		Matrix metalloproteinase-14 (membrane-inserted); Predicted protein; Belongs to the peptidase M10A family	A7SDH5	Phosphoglucomutase (alpha-D-glucose-1,6-bisphosphate-dependent) OS=Nematostella vectensis OX=45351 GN=v1g235307 PE=3 SV=1			A7S5T9	60S ribosomal protein L8 OS=Nematostella vectensis OX=45351 GN=v1g234970 PE=4 SV=1			A7S886	Predicted protein (Fragment) OS=Nematostella vectensis OX=45351 GN=v1g108550 PE=3 SV=1	ECHS1; enoyl-CoA hydratase [EC:4.2.1.17]	Enoyl-coa hydratase, mitochondrial; Predicted protein; Belongs to the enoyl-CoA hydratase/isomerase family
A7S268	Predicted protein (Fragment) OS=Nematostella vectensis OX=45351 GN=v1g101462 PE=3 SV=1	NME8, TXNDC3; thioredoxin domain-containing protein 3	Predicted protein; Belongs to the NDK family	A7T3U2	Predicted protein (Fragment) OS=Nematostella vectensis OX=45351 GN=v1g144787 PE=4 SV=1		Biofilm dispersion protein bdla; Predicted protein	A7S1K9	Predicted protein (Fragment) OS=Nematostella vectensis OX=45351 GN=v1g165346 PE=4 SV=1	CROCC; rootletin	Rootletin isoform x6; Predicted protein	A7SU04	Polyol dehydrogenase OS=Nematostella vectensis OX=45351 GN=v1g193535 PE=3 SV=1			A7S3C2	60S ribosomal protein L9 OS=Nematostella vectensis OX=45351 GN=v1g242566 PE=3 SV=1			A7SGM4	Predicted protein (Fragment) OS=Nematostella vectensis OX=45351 GN=v1g117600 PE=4 SV=1	GLIPR2; glioma pathogenesis-related protein 2	Predicted protein; Belongs to the CRISP family
A7S3J6	Predicted protein (Fragment) OS=Nematostella vectensis OX=45351 GN=v1g102981 PE=4 SV=1	ECE; endothelin-converting enzyme [EC:3.4.24.71]	Endothelin-converting enzyme 2; Predicted protein	A7T700	Predicted protein (Fragment) OS=Nematostella vectensis OX=45351 GN=v1g148426 PE=3 SV=1	PSMA4; 20S proteasome subunit alpha 3 [EC:3.4.25.1]	Proteasome endopeptidase complex	A7SFM8	Predicted protein (Fragment) OS=Nematostella vectensis OX=45351 GN=v1g170078 PE=3 SV=1	ALDH; aldehyde dehydrogenase (NAD+) [EC:1.2.1.3]	Aldehyde dehydrogenase, dimeric nadp-preferring isoform x1; Predicted protein; Aldehyde dehydrogenase ; Belongs to the aldehyde dehydrogenase family	A7S1I5	Predicted protein (Fragment) OS=Nematostella vectensis OX=45351 GN=v1g100694 PE=4 SV=1		Thioredoxin-related transmembrane protein 1; Predicted protein	A7SYK6	Acetyl-CoA deacylase OS=Nematostella vectensis OX=45351 GN=v1g237598 PE=3 SV=1			A7SHM9	Predicted protein (Fragment) OS=Nematostella vectensis OX=45351 GN=v1g118750 PE=4 SV=1	YY; transcription factor YY	Predicted protein
A7S475	Predicted protein (Fragment) OS=Nematostella vectensis OX=45351 GN=v1g104083 PE=4 SV=1	YBX1, NSEP1; Y-box-binding protein 1	Y-box-binding protein 1; Predicted protein	A7T7R0	Predicted protein (Fragment) OS=Nematostella vectensis OX=45351 GN=v1g149214 PE=3 SV=1		60 kDa chaperonin; Predicted protein	A7S970	Predicted protein (Fragment) OS=Nematostella vectensis OX=45351 GN=v1g208718 PE=3 SV=1	CDC37; cell division cycle protein 37	Cell division cycle protein 37; Predicted protein	A7SS78	Predicted protein (Fragment) OS=Nematostella vectensis OX=45351 GN=v1g10117 PE=4 SV=1	SCRIB; protein scribble	Protein scribble homolog; Predicted protein	A7S7W1	Actin-related protein 2 OS=Nematostella vectensis OX=45351 GN=v1g186733 PE=3 SV=1			A7SME8	Predicted protein (Fragment) OS=Nematostella vectensis OX=45351 GN=v1g123682 PE=3 SV=1		Predicted protein; Belongs to the short-chain dehydrogenases/reductases (SDR) family
A7S6H4	Predicted protein (Fragment) OS=Nematostella vectensis OX=45351 GN=v1g106450 PE=3 SV=1	PLA2G, SPLA2; secretory phospholipase A2 [EC:3.1.1.4]	Phospholipase A(2)	A8DVF1	Predicted protein (Fragment) OS=Nematostella vectensis OX=45351 GN=v1g156386 PE=3 SV=1		Low quality protein: succinate--coa ligase [adp-forming] subunit alpha; Predicted protein; Belongs to the succinate/malate CoA ligase alpha subunit family	A7T0T8	Predicted protein (Fragment) OS=Nematostella vectensis OX=45351 GN=v1g220599 PE=4 SV=1	EDC4; enhancer of mRNA-decapping protein 4	Predicted protein	A7S254	Predicted protein (Fragment) OS=Nematostella vectensis OX=45351 GN=v1g101727 PE=4 SV=1	CHN1_2, ARHGAP2_3; chimaerin	Predicted protein	A7SFU6	AICAR transformylase/inosine monophosphate cyclohydrolase OS=Nematostella vectensis OX=45351 GN=v1g170139 PE=3 SV=1			A7RSI8	Predicted protein (Fragment) OS=Nematostella vectensis OX=45351 GN=v1g232211 PE=4 SV=1		Uncharacterized protein loc5517694; Predicted protein
A7S8Y4	Predicted protein (Fragment) OS=Nematostella vectensis OX=45351 GN=v1g109213 PE=4 SV=1		Predicted protein	A8DVW7	Predicted protein (Fragment) OS=Nematostella vectensis OX=45351 GN=v1g156832 PE=3 SV=1		Predicted protein; Belongs to the universal ribosomal protein uS4 family	A7T431	Predicted protein (Fragment) OS=Nematostella vectensis OX=45351 GN=v1g222046 PE=4 SV=1		Uncharacterized protein loc5499820; Predicted protein	A7S5A0	Predicted protein (Fragment) OS=Nematostella vectensis OX=45351 GN=v1g105193 PE=3 SV=1	KDM1A, AOF2, LSD1; [histone H3]-N6,N6-dimethyl-L-lysine4 FAD-dependent demethylase [EC:1.14.99.66]	Lysine-specific histone demethylase 1a-like; Predicted protein	A7SFR2	Alpha-galactosidase OS=Nematostella vectensis OX=45351 GN=v1g170108 PE=3 SV=1			A7RM81	Predicted protein (Fragment) OS=Nematostella vectensis OX=45351 GN=v1g38294 PE=4 SV=1		Predicted protein
A7SSQ6	Predicted protein (Fragment) OS=Nematostella vectensis OX=45351 GN=v1g11203 PE=4 SV=1	PRPF39, PRP39; pre-mRNA-processing factor 39	Predicted protein	A7SM92	Predicted protein (Fragment) OS=Nematostella vectensis OX=45351 GN=v1g172080 PE=4 SV=1	HIP1; huntingtin interacting protein 1	Huntingtin-interacting protein 1-related protein; Predicted protein	A7SC74	Predicted protein (Fragment) OS=Nematostella vectensis OX=45351 GN=v1g23919 PE=4 SV=1	SH3D21; SH3 domain-containing protein 21	Predicted protein	A7SCV7	Predicted protein (Fragment) OS=Nematostella vectensis OX=45351 GN=v1g113718 PE=4 SV=1		Predicted protein	A7S6X6	Amine oxidase OS=Nematostella vectensis OX=45351 GN=v1g229539 PE=3 SV=1			A7REX0	Predicted protein (Fragment) OS=Nematostella vectensis OX=45351 GN=v1g79012 PE=4 SV=1	trxA; thioredoxin 1	Thioredoxin, mitochondrial; Predicted protein; Thioredoxin
A7SEW2	Predicted protein (Fragment) OS=Nematostella vectensis OX=45351 GN=v1g115630 PE=3 SV=1	SGK3; serum/glucocorticoid-regulated kinase 3 [EC:2.7.11.1]	Serine/threonine-protein kinase sgk1 isoform x1; Predicted protein; Belongs to the protein kinase superfamily	A7SRT1	Predicted protein (Fragment) OS=Nematostella vectensis OX=45351 GN=v1g192832 PE=4 SV=1	AHNAK; neuroblast differentiation-associated protein AHNAK	Predicted protein	A7S1Y7	Predicted protein (Fragment) OS=Nematostella vectensis OX=45351 GN=v1g2890 PE=4 SV=1		Predicted protein	A7SJE2	Predicted protein (Fragment) OS=Nematostella vectensis OX=45351 GN=v1g120496 PE=4 SV=1	FGFR1, CD331; fibroblast growth factor receptor 1 [EC:2.7.10.1]	Angiopoietin-1 receptor; Predicted protein	A7RKU9	Anoctamin (Fragment) OS=Nematostella vectensis OX=45351 GN=v1g30680 PE=3 SV=1			A7REQ1	Predicted protein (Fragment) OS=Nematostella vectensis OX=45351 GN=v1g79108 PE=4 SV=1	RBPMS; RNA-binding protein with multiple splicing	Uncharacterized protein loc5522141 isoform x1; Predicted protein
A7SH91	Predicted protein (Fragment) OS=Nematostella vectensis OX=45351 GN=v1g118268 PE=3 SV=1		Predicted protein	A7RW64	Predicted protein (Fragment) OS=Nematostella vectensis OX=45351 GN=v1g203043 PE=3 SV=1	E2.3.1.7; carnitine O-acetyltransferase [EC:2.3.1.7]	Carnitine o-acetyltransferase isoform x1; Predicted protein	A7T368	Predicted protein (Fragment) OS=Nematostella vectensis OX=45351 GN=v1g45967 PE=4 SV=1		Predicted protein	A7SND8	Predicted protein (Fragment) OS=Nematostella vectensis OX=45351 GN=v1g124706 PE=4 SV=1		Uncharacterized protein loc5506148; Predicted protein	A7RNI6	ATP synthase subunit gamma OS=Nematostella vectensis OX=45351 GN=v1g239595 PE=3 SV=1			A7RHN6	Predicted protein (Fragment) OS=Nematostella vectensis OX=45351 GN=v1g82268 PE=4 SV=1		Death-associated protein 1; Predicted protein
A7SLX6	Predicted protein (Fragment) OS=Nematostella vectensis OX=45351 GN=v1g123220 PE=4 SV=1		Fibrinogen c domain-containing protein 1; Predicted protein	A7ST50	Predicted protein (Fragment) OS=Nematostella vectensis OX=45351 GN=v1g217091 PE=4 SV=1	TRIM45; tripartite motif-containing protein 45	Tripartite motif-containing protein 45 isoform x1; Predicted protein	A7RHW5	Predicted protein (Fragment) OS=Nematostella vectensis OX=45351 GN=v1g81828 PE=4 SV=1	CISD3; CDGSH iron-sulfur domain-containing protein 3	Cdgsh iron-sulfur domain-containing protein 3, mitochondrial; Predicted protein	A7SND5	Predicted protein (Fragment) OS=Nematostella vectensis OX=45351 GN=v1g124712 PE=4 SV=1		Predicted protein	A7RV43	ATP synthase subunit O, mitochondrial OS=Nematostella vectensis OX=45351 GN=v1g94346 PE=3 SV=1			A7SWF6	Predicted protein (Fragment) OS=Nematostella vectensis OX=45351 GN=v1g836 PE=3 SV=1	CPD; carboxypeptidase D [EC:3.4.17.22]	Carboxypeptidase d; Predicted protein
A7SMG3	Predicted protein (Fragment) OS=Nematostella vectensis OX=45351 GN=v1g123730 PE=4 SV=1	ILF2; interleukin enhancer-binding factor 2	Interleukin enhancer-binding factor 2 homolog; Predicted protein	A8DWJ6	Predicted protein (Fragment) OS=Nematostella vectensis OX=45351 GN=v1g226019 PE=4 SV=1		Predicted protein	A7RPP3	Predicted protein (Fragment) OS=Nematostella vectensis OX=45351 GN=v1g88977 PE=3 SV=1	PFDN1; prefoldin subunit 1	Prefoldin subunit 1; Predicted protein	A7SNM5	Predicted protein (Fragment) OS=Nematostella vectensis OX=45351 GN=v1g125072 PE=4 SV=1		Predicted protein	A7RQV8	Beta-galactosidase OS=Nematostella vectensis OX=45351 GN=v1g161675 PE=3 SV=1			A7S9J0	Predicted protein OS=Nematostella vectensis OX=45351 GN=v1g110149 PE=4 SV=1	LPP; lipoma-prefererred partner	Lipoma-preferred partner homolog; Predicted protein
A7STB9	Predicted protein (Fragment) OS=Nematostella vectensis OX=45351 GN=v1g130928 PE=4 SV=1		Predicted protein	A7RZ56	Predicted protein (Fragment) OS=Nematostella vectensis OX=45351 GN=v1g25565 PE=3 SV=1		Probable caffeoyl-coa o-methyltransferase 1; Predicted protein	A7RTF3	Predicted protein (Fragment) OS=Nematostella vectensis OX=45351 GN=v1g92763 PE=4 SV=1	VWA5; von Willebrand factor A domain-containing protein 5	Predicted protein	A7SWI4	Predicted protein (Fragment) OS=Nematostella vectensis OX=45351 GN=v1g135318 PE=4 SV=1	STK24_25_MST4; serine/threonine-protein kinase 24/25/MST4 [EC:2.7.11.1]	Serine/threonine-protein kinase 24/25/mst4; Predicted protein	A7RET7	Beta-hexosaminidase OS=Nematostella vectensis OX=45351 GN=v1g237718 PE=3 SV=1			A7SAJ7	Predicted protein OS=Nematostella vectensis OX=45351 GN=v1g111058 PE=3 SV=1	NDUFS8; NADH dehydrogenase (ubiquinone) Fe-S protein 8 [EC:7.1.1.2]	Nadh dehydrogenase (ubiquinone) fe-s protein 8; Predicted protein
A7T0T5	Predicted protein (Fragment) OS=Nematostella vectensis OX=45351 GN=v1g140821 PE=4 SV=1		Predicted protein	A7SI50	Predicted protein (Fragment) OS=Nematostella vectensis OX=45351 GN=v1g29235 PE=4 SV=1	CSK; c-src tyrosine kinase [EC:2.7.10.2]	Tyrosine-protein kinase csk; Predicted protein	A7RUS0	Predicted protein (Fragment) OS=Nematostella vectensis OX=45351 GN=v1g94204 PE=4 SV=1	NWD; NACHT domain- and WD repeat-containing protein	Predicted protein	A7SS67	Predicted protein (Fragment) OS=Nematostella vectensis OX=45351 GN=v1g192951 PE=4 SV=1		Protein flightless-1 homolog; Predicted protein	A7SLW1	Branched-chain-amino-acid aminotransferase OS=Nematostella vectensis OX=45351 GN=v1g246094 PE=3 SV=1			A7S1M1	Predicted protein OS=Nematostella vectensis OX=45351 GN=v1g165363 PE=4 SV=1	ATAD3A_B; ATPase family AAA domain-containing protein 3A/B	Atpase family aaa domain-containing protein 3a/b; Predicted protein
A7T1B0	Predicted protein (Fragment) OS=Nematostella vectensis OX=45351 GN=v1g141604 PE=4 SV=1	CISD2; CDGSH iron-sulfur domain-containing protein 2	Cdgsh iron-sulfur domain-containing protein 2 homolog; Predicted protein	A7S9K2	Predicted protein (Fragment) OS=Nematostella vectensis OX=45351 GN=v1g50978 PE=3 SV=1	CTNND2; catenin delta-2	Predicted protein	A7RY68	Predicted protein (Fragment) OS=Nematostella vectensis OX=45351 GN=v1g97640 PE=4 SV=1	AKT; RAC serine/threonine-protein kinase [EC:2.7.11.1]	Rac-gamma serine/threonine-protein kinase; Predicted protein	A7S3A8	Predicted protein (Fragment) OS=Nematostella vectensis OX=45351 GN=v1g20072 PE=3 SV=1	MYO5; myosin V	Predicted protein; Belongs to the TRAFAC class myosin-kinesin ATPase superfamily. Myosin family	A7SWC2	Butyryl-CoA dehydrogenase OS=Nematostella vectensis OX=45351 GN=v1g194219 PE=3 SV=1			A7S2I8	Predicted protein OS=Nematostella vectensis OX=45351 GN=v1g165649 PE=3 SV=1		Isochorismatase domain-containing protein 2; Predicted protein
A7T1P5	Predicted protein (Fragment) OS=Nematostella vectensis OX=45351 GN=v1g142064 PE=4 SV=1	PXDN, VPO1; peroxidase [EC:1.11.1.7]	Predicted protein	A7RPK2	Predicted protein (Fragment) OS=Nematostella vectensis OX=45351 GN=v1g70665 PE=4 SV=1		Predicted protein	A7S2D9	Predicted protein OS=Nematostella vectensis OX=45351 GN=v1g101975 PE=4 SV=1	SDCBP; syntenin-1	Predicted protein	A7T319	Predicted protein (Fragment) OS=Nematostella vectensis OX=45351 GN=v1g221615 PE=3 SV=1		Predicted protein	A7RF52	Calcium/calmodulin-dependent protein kinase OS=Nematostella vectensis OX=45351 GN=v1g157808 PE=1 SV=1			A7SES7	Predicted protein OS=Nematostella vectensis OX=45351 GN=v1g169781 PE=4 SV=1	IFT172; intraflagellar transport protein 172	Intraflagellar transport protein 172 homolog; Predicted protein
A7T445	Predicted protein (Fragment) OS=Nematostella vectensis OX=45351 GN=v1g145164 PE=4 SV=1		Short-chain collagen c4; Predicted protein	A7RHG5	Predicted protein (Fragment) OS=Nematostella vectensis OX=45351 GN=v1g81245 PE=4 SV=1		Predicted protein	A7SCI4	Predicted protein OS=Nematostella vectensis OX=45351 GN=v1g113255 PE=4 SV=1	HPGDS; prostaglandin-H2 D-isomerase / glutathione transferase [EC:5.3.99.2 2.5.1.18]	Prostaglandin-H2 D-isomerase / glutathione transferase; Predicted protein	A7RQL5	Predicted protein (Fragment) OS=Nematostella vectensis OX=45351 GN=v1g239997 PE=4 SV=1		Predicted protein	A7T0H5	Calcium/calmodulin-dependent protein kinase OS=Nematostella vectensis OX=45351 GN=v1g220432 PE=1 SV=1			A7ST94	Predicted protein OS=Nematostella vectensis OX=45351 GN=v1g174073 PE=4 SV=1	RAB11A; Ras-related protein Rab-11A	Ras-related protein rab-11a; Predicted protein
A7T444	Predicted protein (Fragment) OS=Nematostella vectensis OX=45351 GN=v1g145169 PE=4 SV=1		Short-chain collagen c4; Predicted protein	A7RKR5	Predicted protein (Fragment) OS=Nematostella vectensis OX=45351 GN=v1g85083 PE=3 SV=1	ERF3, GSPT; peptide chain release factor subunit 3	Eukaryotic peptide chain release factor gtp-binding subunit erf3a; Predicted protein	A7SNG6	Predicted protein OS=Nematostella vectensis OX=45351 GN=v1g124869 PE=3 SV=1	galK; galactokinase [EC:2.7.1.6]	Predicted protein	A7T4Z6	Predicted protein (Fragment) OS=Nematostella vectensis OX=45351 GN=v1g248720 PE=3 SV=1		Gamma-glutamyl hydrolase a; Predicted protein	A7RM93	Calcium-transporting ATPase OS=Nematostella vectensis OX=45351 GN=v1g160437 PE=3 SV=1			A7S303	Predicted protein OS=Nematostella vectensis OX=45351 GN=v1g185023 PE=4 SV=1	RANBP1; Ran-binding protein 1	Ran-specific gtpase-activating protein; Predicted protein
A7TA21	Predicted protein (Fragment) OS=Nematostella vectensis OX=45351 GN=v1g151935 PE=3 SV=1		Inactive pancreatic lipase-related protein 1; Predicted protein	A7RZ13	Predicted protein (Fragment) OS=Nematostella vectensis OX=45351 GN=v1g98301 PE=3 SV=1	STOM; erythrocyte band 7 integral membrane protein	Predicted protein	A7SUJ8	Predicted protein OS=Nematostella vectensis OX=45351 GN=v1g132315 PE=4 SV=1	CRIP1, CRP1; cysteine-rich protein 1	Cysteine-rich protein 2; Predicted protein	A7T9Q8	Predicted protein (Fragment) OS=Nematostella vectensis OX=45351 GN=v1g5371 PE=3 SV=1	ACTB_G1; actin beta/gamma 1	Predicted protein; Belongs to the actin family	A7S924	CCT-alpha (Fragment) OS=Nematostella vectensis OX=45351 GN=v1g109595 PE=3 SV=1			A7S4Z3	Predicted protein OS=Nematostella vectensis OX=45351 GN=v1g185723 PE=3 SV=1	TMED10, ERV25; p24 family protein delta-1	Transmembrane protein tmp21; Predicted protein
A7SWI7	Predicted protein (Fragment) OS=Nematostella vectensis OX=45351 GN=v1g194278 PE=3 SV=1	KPNA3_4; importin subunit alpha-4/3	Importin subunit alpha-4/3; Predicted protein	A7RZU1	Predicted protein (Fragment) OS=Nematostella vectensis OX=45351 GN=v1g99196 PE=3 SV=1	FOLH1, GCPII; glutamate carboxypeptidase II (folate hydrolase 1) [EC:3.4.17.21]	Predicted protein	A7SUK0	Predicted protein OS=Nematostella vectensis OX=45351 GN=v1g132347 PE=3 SV=1	VTI1; vesicle transport through interaction with t-SNAREs 1	Vesicle transport through interaction with t-snares homolog 1a isoform x2; Predicted protein	A7RFK1	Predicted protein (Fragment) OS=Nematostella vectensis OX=45351 GN=v1g79796 PE=3 SV=1	SVEP1; sushi, von Willebrand factor type A, EGF and pentraxin domain-containing protein 1	Sushi, von willebrand factor type a, egf and pentraxin domain-containing protein 1; Predicted protein	A7RGP0	CCT-epsilon OS=Nematostella vectensis OX=45351 GN=v1g233945 PE=3 SV=1			A7S7W8	Predicted protein OS=Nematostella vectensis OX=45351 GN=v1g186750 PE=4 SV=1	SF3B2, SAP145, CUS1; splicing factor 3B subunit 2	Splicing factor 3b subunit 2; Predicted protein
A7RUJ3	Predicted protein (Fragment) OS=Nematostella vectensis OX=45351 GN=v1g202369 PE=4 SV=1	HGS, HRS, VPS27; hepatocyte growth factor-regulated tyrosine kinase substrate	Hepatocyte growth factor-regulated tyrosine kinase substrate isoform x3; Predicted protein	A7SBS2	Predicted protein OS=Nematostella vectensis OX=45351 GN=v1g112507 PE=4 SV=1	SFPQ, PSF; splicing factor, proline- and glutamine-rich	Predicted protein	A7SYA8	Predicted protein OS=Nematostella vectensis OX=45351 GN=v1g137721 PE=4 SV=1	SRSF7, SFRS7; serine/arginine-rich splicing factor 7	Predicted protein	A7RH56	Predicted protein (Fragment) OS=Nematostella vectensis OX=45351 GN=v1g81470 PE=3 SV=1	CTSD; cathepsin D [EC:3.4.23.5]	Lysosomal aspartic protease; Predicted protein; Belongs to the peptidase A1 family	A7SFJ1	Cell division control protein 42 homolog OS=Nematostella vectensis OX=45351 GN=v1g189251 PE=3 SV=1			A7SWS9	Predicted protein OS=Nematostella vectensis OX=45351 GN=v1g194326 PE=3 SV=1	VDAC2; voltage-dependent anion channel protein 2	Voltage-dependent anion-selective channel protein 2; Predicted protein
A7S3J0	Predicted protein (Fragment) OS=Nematostella vectensis OX=45351 GN=v1g242616 PE=3 SV=1	CYFIP; cytoplasmic FMR1 interacting protein	Predicted protein	A7RGV0	Predicted protein OS=Nematostella vectensis OX=45351 GN=v1g158484 PE=4 SV=1	GSN; gelsolin	Gelsolin-like protein 1; Predicted protein	A7T002	Predicted protein OS=Nematostella vectensis OX=45351 GN=v1g139747 PE=4 SV=1	NIT2, yafV; omega-amidase [EC:3.5.1.3]	Omega-amidase nit2; Predicted protein	A7RNQ3	Predicted protein (Fragment) OS=Nematostella vectensis OX=45351 GN=v1g87802 PE=3 SV=1	SNX7_30; sorting nexin-7/30	Predicted protein	A7SCZ7	cGMP-dependent protein kinase OS=Nematostella vectensis OX=45351 GN=v1g244400 PE=3 SV=1			A7SYP4	Predicted protein OS=Nematostella vectensis OX=45351 GN=v1g194841 PE=3 SV=1	SH3GL; endophilin-A	Predicted protein
A7TDG2	Predicted protein (Fragment) OS=Nematostella vectensis OX=45351 GN=v1g45829 PE=4 SV=1		Predicted protein	A7RT76	Predicted protein OS=Nematostella vectensis OX=45351 GN=v1g162401 PE=4 SV=1	trxA; thioredoxin 1	Thioredoxin-1 isoform X1; Thioredoxin ; Belongs to the thioredoxin family	A7T0E1	Predicted protein OS=Nematostella vectensis OX=45351 GN=v1g140278 PE=3 SV=1	CUGBP, BRUNOL, CELF; CUG-BP- and ETR3-like factor	Predicted protein	A7RSW0	Predicted protein (Fragment) OS=Nematostella vectensis OX=45351 GN=v1g92292 PE=4 SV=1		Predicted protein	A7RU37	Citrate hydro-lyase OS=Nematostella vectensis OX=45351 GN=v1g93721 PE=3 SV=1			A7T0T9	Predicted protein OS=Nematostella vectensis OX=45351 GN=v1g195236 PE=4 SV=1	UBE2V; ubiquitin-conjugating enzyme E2 variant	Ubiquitin-conjugating enzyme e2 variant 2; Predicted protein; Belongs to the ubiquitin-conjugating enzyme family
A7SC87	Predicted protein (Fragment) OS=Nematostella vectensis OX=45351 GN=v1g59536 PE=4 SV=1		Predicted protein	A7SGM5	Predicted protein OS=Nematostella vectensis OX=45351 GN=v1g170435 PE=3 SV=1	BPI; bactericidal permeability-increasing protein	Lipopolysaccharide-binding protein; Predicted protein	A7RRZ1	Predicted protein OS=Nematostella vectensis OX=45351 GN=v1g162091 PE=4 SV=1		Predicted protein	A7S350	Predicted protein OS=Nematostella vectensis OX=45351 GN=v1g102625 PE=4 SV=1	ARFGEF, BIG; brefeldin A-inhibited guanine nucleotide-exchange protein	Protein mgarp-like; Predicted protein	A7SUW1	Complex I-B14 OS=Nematostella vectensis OX=45351 GN=v1g193830 PE=3 SV=1			A7RHH9	Predicted protein OS=Nematostella vectensis OX=45351 GN=v1g197208 PE=3 SV=1		Neurogenic locus notch homolog protein 1 isoform x1; Predicted protein
A8DVT9	Predicted protein (Fragment) OS=Nematostella vectensis OX=45351 GN=v1g68429 PE=3 SV=1		Aconitate hydratase a; Predicted protein	A7SGX2	Predicted protein OS=Nematostella vectensis OX=45351 GN=v1g170524 PE=4 SV=1		Mam and ldl-receptor class a domain-containing protein 2; Predicted protein; Belongs to the peptidase S1 family	A7RVA9	Predicted protein OS=Nematostella vectensis OX=45351 GN=v1g163145 PE=3 SV=1	uidA, GUSB; beta-glucuronidase [EC:3.2.1.31]	Predicted protein	A7S6E0	Predicted protein OS=Nematostella vectensis OX=45351 GN=v1g106290 PE=3 SV=1	STK33; serine/threonine kinase 33 [EC:2.7.11.1]	Serine/threonine-protein kinase 33 isoform x1; Predicted protein; Belongs to the protein kinase superfamily	A7SY83	CTP:phosphoethanolamine cytidylyltransferase OS=Nematostella vectensis OX=45351 GN=v1g175500 PE=3 SV=1			A7RK73	Predicted protein OS=Nematostella vectensis OX=45351 GN=v1g198315 PE=3 SV=1	PRDX2_4, ahpC; peroxiredoxin 2/4 [EC:1.11.1.24]	Peroxiredoxin-1 isoform X2; Predicted protein
A7RG39	Predicted protein (Fragment) OS=Nematostella vectensis OX=45351 GN=v1g81002 PE=4 SV=1	DBI, ACBP; diazepam-binding inhibitor (GABA receptor modulator, acyl-CoA-binding protein)	Diazepam-binding inhibitor (gaba receptor modulator, acyl-coa-binding protein); Predicted protein	A7SIH5	Predicted protein OS=Nematostella vectensis OX=45351 GN=v1g170954 PE=4 SV=1	PLAA, DOA1, UFD3; phospholipase A-2-activating protein	Phospholipase a-2-activating protein; Predicted protein	A7RVM2	Predicted protein OS=Nematostella vectensis OX=45351 GN=v1g163220 PE=3 SV=1	HSD17B10; 3-hydroxyacyl-CoA dehydrogenase / 3-hydroxy-2-methylbutyryl-CoA dehydrogenase [EC:1.1.1.35 1.1.1.178]	3-hydroxyacyl-CoA dehydrogenase / 3-hydroxy-2-methylbutyryl-CoA dehydrogenase; Predicted protein; Belongs to the short-chain dehydrogenases/reductases (SDR) family	A7S712	Predicted protein OS=Nematostella vectensis OX=45351 GN=v1g106870 PE=4 SV=1	RTT103; regulator of Ty1 transposition protein 103	Predicted protein	A7SFV8	D-3-phosphoglycerate dehydrogenase (Fragment) OS=Nematostella vectensis OX=45351 GN=v1g170150 PE=3 SV=1			A7RZU7	Predicted protein OS=Nematostella vectensis OX=45351 GN=v1g204606 PE=4 SV=1	ACAP; Arf-GAP with coiled-coil, ANK repeat and PH domain-containing protein	Predicted protein
A7RIK0	Predicted protein (Fragment) OS=Nematostella vectensis OX=45351 GN=v1g82630 PE=3 SV=1	PTGR3, ZADH2; prostaglandin reductase 3 [EC:1.3.1.48]	Prostaglandin reductase 3; Predicted protein	A7SPL2	Predicted protein OS=Nematostella vectensis OX=45351 GN=v1g172894 PE=4 SV=1	DHDH; dihydrodiol dehydrogenase / D-xylose 1-dehydrogenase (NADP) [EC:1.3.1.20 1.1.1.179]	Dihydrodiol dehydrogenase / d-xylose 1-dehydrogenase (nadp); Predicted protein	A7S703	Predicted protein OS=Nematostella vectensis OX=45351 GN=v1g167234 PE=4 SV=1	SLC7A9_15, BAT1; solute carrier family 7 (L-type amino acid transporter), member 9/15	B(0,+)-type amino acid transporter 1; Predicted protein	A7SU84	Predicted protein OS=Nematostella vectensis OX=45351 GN=v1g131971 PE=4 SV=1	ECM4, yqjG; glutathionyl-hydroquinone reductase [EC:1.8.5.7]	Glutathionyl-hydroquinone reductase yqjg; Predicted protein	A7SJZ8	Dipeptidase (Fragment) OS=Nematostella vectensis OX=45351 GN=v1g121040 PE=3 SV=1			A7S7Z7	Predicted protein OS=Nematostella vectensis OX=45351 GN=v1g208190 PE=4 SV=1	ZFYVE21; zinc finger FYVE domain-containing protein 21	Predicted protein
A7RIK1	Predicted protein (Fragment) OS=Nematostella vectensis OX=45351 GN=v1g82804 PE=4 SV=1	SLC17A6_7_8; MFS transporter, ACS family, solute carrier family 17 (sodium-dependent inorganic phosphate cotransporter), member 6/7/8	Predicted protein	A7SZQ8	Predicted protein OS=Nematostella vectensis OX=45351 GN=v1g175823 PE=4 SV=1		Predicted protein	A7SMB0	Predicted protein OS=Nematostella vectensis OX=45351 GN=v1g172093 PE=4 SV=1		Cold-inducible rna-binding protein; Predicted protein	A7RFX1	Predicted protein OS=Nematostella vectensis OX=45351 GN=v1g158071 PE=3 SV=1	RP-S3e, RPS3; small subunit ribosomal protein S3e	Small subunit ribosomal protein s3e; Predicted protein	A7SK00	Dipeptidase OS=Nematostella vectensis OX=45351 GN=v1g171453 PE=3 SV=1			A7SMZ4	Predicted protein OS=Nematostella vectensis OX=45351 GN=v1g214753 PE=3 SV=1	AGXT2; alanine-glyoxylate transaminase / (R)-3-amino-2-methylpropionate-pyruvate transaminase [EC:2.6.1.44 2.6.1.40]	Alanine-glyoxylate transaminase / (r)-3-amino-2-methylpropionate-pyruvate transaminase; Predicted protein; Belongs to the class-III pyridoxal-phosphate-dependent aminotransferase family
A7RQK5	Predicted protein (Fragment) OS=Nematostella vectensis OX=45351 GN=v1g89807 PE=4 SV=1		Glutaredoxin-3 isoform X1; Predicted protein	A7S4P4	Predicted protein OS=Nematostella vectensis OX=45351 GN=v1g185623 PE=3 SV=1		Digestive cysteine proteinase 1; Predicted protein; Belongs to the peptidase C1 family	A7SMN3	Predicted protein OS=Nematostella vectensis OX=45351 GN=v1g172167 PE=4 SV=1	RDH14; retinol dehydrogenase 14 [EC:1.1.1.-]	Retinol dehydrogenase 14; Predicted protein	A7RH22	Predicted protein OS=Nematostella vectensis OX=45351 GN=v1g158557 PE=3 SV=1	SNRNP200, BRR2; pre-mRNA-splicing helicase BRR2 [EC:3.6.4.13]	U5 small nuclear ribonucleoprotein 200 kDa helicase isoform X1; Predicted protein	A7RGS4	Dynactin subunit 1 (Fragment) OS=Nematostella vectensis OX=45351 GN=v1g81224 PE=3 SV=1			A7SN30	Predicted protein OS=Nematostella vectensis OX=45351 GN=v1g214798 PE=3 SV=1	ELAVL2_3_4; ELAV like protein 2/3/4	Elav like protein 2/3/4; Predicted protein
A7RRK0	Predicted protein (Fragment) OS=Nematostella vectensis OX=45351 GN=v1g90754 PE=3 SV=1	NDUFV2; NADH dehydrogenase (ubiquinone) flavoprotein 2 [EC:7.1.1.2]	Nadh dehydrogenase [ubiquinone] flavoprotein 2, mitochondrial; Predicted protein	A7SKE6	Predicted protein OS=Nematostella vectensis OX=45351 GN=v1g190767 PE=4 SV=1	CALU; calumenin	Predicted protein	A7SQR0	Predicted protein OS=Nematostella vectensis OX=45351 GN=v1g173281 PE=4 SV=1	EEF1B; elongation factor 1-beta	Elongation factor 1-beta; Predicted protein	A7RHT1	Predicted protein OS=Nematostella vectensis OX=45351 GN=v1g158808 PE=4 SV=1		Predicted protein	A7SSW8	Elongation factor 1-alpha OS=Nematostella vectensis OX=45351 GN=v1g247215 PE=3 SV=1			A7RMA3	Predicted protein OS=Nematostella vectensis OX=45351 GN=v1g236477 PE=3 SV=1	COX6A; cytochrome c oxidase subunit 6a	Cytochrome c oxidase subunit 6a, mitochondrial; Predicted protein; Belongs to the cytochrome c oxidase subunit 6A family
A7RRQ3	Predicted protein (Fragment) OS=Nematostella vectensis OX=45351 GN=v1g91305 PE=4 SV=1		E3 ubiquitin-protein ligase TRIM56-like; Predicted protein	A7RLN6	Predicted protein OS=Nematostella vectensis OX=45351 GN=v1g198917 PE=3 SV=1	LIN7; protein lin-7	Protein lin-7 homolog c isoform x1; Predicted protein	A7SSA9	Predicted protein OS=Nematostella vectensis OX=45351 GN=v1g173776 PE=4 SV=1	EFHD2; EF-hand domain-containing family member D2	Predicted protein	A7RKY4	Predicted protein OS=Nematostella vectensis OX=45351 GN=v1g159899 PE=3 SV=1	SGPL1, DPL1; sphinganine-1-phosphate aldolase [EC:4.1.2.27]	Sphinganine-1-phosphate aldolase; Predicted protein	A7S8G4	Eukaryotic translation initiation factor 2A OS=Nematostella vectensis OX=45351 GN=v1g243561 PE=3 SV=1			A7RRQ2	Predicted protein OS=Nematostella vectensis OX=45351 GN=v1g236573 PE=4 SV=1		Universal stress protein yxie; Predicted protein
A7S322	Predicted protein OS=Nematostella vectensis OX=45351 GN=v1g102600 PE=3 SV=1		Tissue factor pathway inhibitor; Predicted protein	A7RVQ6	Predicted protein OS=Nematostella vectensis OX=45351 GN=v1g202841 PE=4 SV=1		Uncharacterized protein loc5516429; Predicted protein	A7T0U6	Predicted protein OS=Nematostella vectensis OX=45351 GN=v1g176042 PE=3 SV=1		Cytochrome p450 27c1 isoform x2; Predicted protein; Belongs to the cytochrome P450 family	A7RL06	Predicted protein OS=Nematostella vectensis OX=45351 GN=v1g159915 PE=3 SV=1	GRHPR; glyoxylate/hydroxypyruvate reductase [EC:1.1.1.79 1.1.1.81]	Glyoxylate reductase/hydroxypyruvate reductase; Predicted protein; Belongs to the D-isomer specific 2-hydroxyacid dehydrogenase family	A7SKE9	Eukaryotic translation initiation factor 3 subunit G OS=Nematostella vectensis OX=45351 GN=v1g171563 PE=3 SV=1			A7SSE4	Predicted protein OS=Nematostella vectensis OX=45351 GN=v1g237474 PE=3 SV=1	SLC25A1, CTP; solute carrier family 25 (mitochondrial citrate transporter), member 1	Solute carrier family 25 (mitochondrial citrate transporter), member 1; Predicted protein; Belongs to the mitochondrial carrier (TC 2.A.29) family
A7S681	Predicted protein OS=Nematostella vectensis OX=45351 GN=v1g106239 PE=4 SV=1	SULT1; sulfotransferase [EC:2.8.2.-]	Sulfotransferase 1c2; Predicted protein	A7SGH7	Predicted protein OS=Nematostella vectensis OX=45351 GN=v1g211930 PE=3 SV=1	IK, RED, RER; IK cytokine	Predicted protein	A7RRP2	Predicted protein OS=Nematostella vectensis OX=45351 GN=v1g181204 PE=4 SV=1	PDCD6IP, ALIX, RIM20; programmed cell death 6-interacting protein	Programmed cell death 6-interacting protein; Predicted protein	A7RR66	Predicted protein OS=Nematostella vectensis OX=45351 GN=v1g161775 PE=4 SV=1	DLG1; disks large protein 1	Disks large homolog 1; Predicted protein	A7RSH7	Eukaryotic translation initiation factor 3 subunit J OS=Nematostella vectensis OX=45351 GN=v1g240395 PE=3 SV=1			A7RLM9	Predicted protein OS=Nematostella vectensis OX=45351 GN=v1g239161 PE=3 SV=1	RP-S10e, RPS10; small subunit ribosomal protein S10e	Small subunit ribosomal protein s10e; Predicted protein
A7SSN1	Predicted protein OS=Nematostella vectensis OX=45351 GN=v1g130157 PE=3 SV=1	MTCH; mitochondrial carrier	Mitochondrial carrier homolog 2-like; Predicted protein; Belongs to the mitochondrial carrier (TC 2.A.29) family	A7SJK6	Predicted protein OS=Nematostella vectensis OX=45351 GN=v1g213250 PE=3 SV=1		Predicted protein; Belongs to the actin family	A7RU20	Predicted protein OS=Nematostella vectensis OX=45351 GN=v1g181969 PE=4 SV=1	PPP1R7, SDS22; protein phosphatase 1 regulatory subunit 7	Protein phosphatase 1 regulatory subunit 7; Predicted protein	A7S0P8	Predicted protein OS=Nematostella vectensis OX=45351 GN=v1g165005 PE=3 SV=1	RDH8; retinol dehydrogenase 8 [EC:1.1.1.-]	Retinol dehydrogenase 8; Predicted protein; Belongs to the short-chain dehydrogenases/reductases (SDR) family	A7RZU8	Eukaryotic translation initiation factor 5 OS=Nematostella vectensis OX=45351 GN=v1g99103 PE=3 SV=1			A7RTS1	Predicted protein OS=Nematostella vectensis OX=45351 GN=v1g240618 PE=4 SV=1	RAP1A; Ras-related protein Rap-1A	Ras-related protein rap-1a; Predicted protein
A7T8H6	Predicted protein OS=Nematostella vectensis OX=45351 GN=v1g150226 PE=4 SV=1		Predicted protein	A7SS91	Predicted protein OS=Nematostella vectensis OX=45351 GN=v1g216666 PE=4 SV=1		Collagen triple helix repeat-containing protein 1; Predicted protein	A7RVE8	Predicted protein OS=Nematostella vectensis OX=45351 GN=v1g182399 PE=3 SV=1	COPS5, CSN5; COP9 signalosome complex subunit 5 [EC:3.4.-.-]	COP9 signalosome complex subunit 5; Predicted protein	A7SLG8	Predicted protein OS=Nematostella vectensis OX=45351 GN=v1g171873 PE=4 SV=1	ELMO1, CED12; engulfment and cell motility protein 1	Engulfment and cell motility protein 1; Predicted protein	A7RHF7	Eukaryotic translation initiation factor 6 OS=Nematostella vectensis OX=45351 GN=EIF6 PE=3 SV=1			A7S1A8	Predicted protein OS=Nematostella vectensis OX=45351 GN=v1g242153 PE=4 SV=1		Universal stress protein in qah/oas sulfhydrylase 3'region; Predicted protein
A7RIE1	Predicted protein OS=Nematostella vectensis OX=45351 GN=v1g159083 PE=3 SV=1	DOCK1; dedicator of cytokinesis protein 1	Dedicator of cytokinesis protein 1 isoform x1; Predicted protein; Belongs to the DOCK family	A7SW08	Predicted protein OS=Nematostella vectensis OX=45351 GN=v1g218352 PE=4 SV=1		Uncharacterized protein loc5503099 isoform x1; Predicted protein	A7S6J5	Predicted protein OS=Nematostella vectensis OX=45351 GN=v1g186301 PE=3 SV=1	K06874; zinc finger protein	Zinc finger protein zpr1; Predicted protein	A7RMC7	Predicted protein OS=Nematostella vectensis OX=45351 GN=v1g179729 PE=4 SV=1		Saccharopine dehydrogenase-like oxidoreductase; Predicted protein	A7S4K7	Exportin-2 OS=Nematostella vectensis OX=45351 GN=v1g185581 PE=3 SV=1			A7S650	Predicted protein OS=Nematostella vectensis OX=45351 GN=v1g243138 PE=4 SV=1		Predicted protein
A7RT86	Predicted protein OS=Nematostella vectensis OX=45351 GN=v1g162417 PE=4 SV=1	E2.2.1.1, tktA, tktB; transketolase [EC:2.2.1.1]	Predicted protein	A7T5R3	Predicted protein OS=Nematostella vectensis OX=45351 GN=v1g222694 PE=4 SV=1	ADAMTS6; a disintegrin and metalloproteinase with thrombospondin motifs 6 [EC:3.4.24.-]	Predicted protein	A7SC06	Predicted protein OS=Nematostella vectensis OX=45351 GN=v1g188037 PE=3 SV=1	CSTA_B; cystatin-A/B	Predicted protein; Belongs to the cystatin family	A7RS48	Predicted protein OS=Nematostella vectensis OX=45351 GN=v1g181382 PE=4 SV=1	ABHD17; abhydrolase domain-containing protein 17 [EC:3.1.2.22]	Alpha/beta hydrolase domain-containing protein 17c; Predicted protein	A7S8I5	Ferritin OS=Nematostella vectensis OX=45351 GN=v1g208427 PE=3 SV=1			A7S8C3	Predicted protein OS=Nematostella vectensis OX=45351 GN=v1g243534 PE=4 SV=1	QCR2, UQCRC2; ubiquinol-cytochrome c reductase core subunit 2	Cytochrome b-c1 complex subunit 2, mitochondrial isoform x1; Predicted protein
A7RTJ4	Predicted protein OS=Nematostella vectensis OX=45351 GN=v1g162513 PE=3 SV=1	TAF6; transcription initiation factor TFIID subunit 6	Transcription initiation factor tfiid subunit 6; Predicted protein	A7T7V2	Predicted protein OS=Nematostella vectensis OX=45351 GN=v1g223532 PE=4 SV=1		Predicted protein	A7SD22	Predicted protein OS=Nematostella vectensis OX=45351 GN=v1g188356 PE=3 SV=1	RP-L44e, RPL44; large subunit ribosomal protein L44e	Large subunit ribosomal protein l44e; Predicted protein; Belongs to the eukaryotic ribosomal protein eL42 family	A7S2B4	Predicted protein OS=Nematostella vectensis OX=45351 GN=v1g184779 PE=3 SV=1	ACSS1_2, acs; acetyl-CoA synthetase [EC:6.2.1.1]	Acetyl-coenzyme a synthetase, cytoplasmic; Predicted protein	A7SF13	Fructose-bisphosphate aldolase OS=Nematostella vectensis OX=45351 GN=v1g244812 PE=3 SV=1			A7SR61	Predicted protein OS=Nematostella vectensis OX=45351 GN=v1g246873 PE=4 SV=1		Uncharacterized protein loc5505045; Predicted protein
A7RTW3	Predicted protein OS=Nematostella vectensis OX=45351 GN=v1g162648 PE=3 SV=1	AP1M; AP-1 complex subunit mu	AP-1 complex subunit mu-1; Predicted protein; Belongs to the adaptor complexes medium subunit family	A7S3Z5	Predicted protein OS=Nematostella vectensis OX=45351 GN=v1g229337 PE=3 SV=1	EIF2S2; translation initiation factor 2 subunit 2	Eukaryotic translation initiation factor 2 subunit 2; Predicted protein	A7SD62	Predicted protein OS=Nematostella vectensis OX=45351 GN=v1g188407 PE=3 SV=1	AMPD; AMP deaminase [EC:3.5.4.6]	Predicted protein	A7SBG2	Predicted protein OS=Nematostella vectensis OX=45351 GN=v1g187863 PE=3 SV=1		Denn domain-containing protein 10 isoform x1; Predicted protein	A7SYK1	Fumarate hydratase OS=Nematostella vectensis OX=45351 GN=v1g237597 PE=3 SV=1			A7SUQ5	Predicted protein OS=Nematostella vectensis OX=45351 GN=v1g247521 PE=3 SV=1	RP-L24e, RPL24; large subunit ribosomal protein L24e	Large subunit ribosomal protein l24e; Predicted protein
A7RZ03	Predicted protein OS=Nematostella vectensis OX=45351 GN=v1g164353 PE=3 SV=1	CYC; cytochrome c	Predicted protein; Electron carrier protein. The oxidized form of the cytochrome c heme group can accept an electron from the heme group of the cytochrome c1 subunit of cytochrome reductase. Cytochrome c then transfers this electron to the cytochrome oxidase complex, the final protein carrier in the mitochondrial electron-transport chain	A7RHG1	Predicted protein OS=Nematostella vectensis OX=45351 GN=v1g231809 PE=4 SV=1	KLHL20, KLEIP; kelch-like protein 20	Kelch domain-containing protein 8b; Predicted protein	A7SEM3	Predicted protein OS=Nematostella vectensis OX=45351 GN=v1g188927 PE=3 SV=1	iolG; myo-inositol 2-dehydrogenase / D-chiro-inositol 1-dehydrogenase [EC:1.1.1.18 1.1.1.369]	Myo-inositol 2-dehydrogenase / d-chiro-inositol 1-dehydrogenase; Predicted protein	A7SF35	Predicted protein OS=Nematostella vectensis OX=45351 GN=v1g189121 PE=4 SV=1		Predicted protein	A7S143	Gamma-cystathionase OS=Nematostella vectensis OX=45351 GN=v1g184363 PE=3 SV=1			A7T0K8	Predicted protein OS=Nematostella vectensis OX=45351 GN=v1g248362 PE=3 SV=1	pfdB, PFDN6; prefoldin beta subunit	Prefoldin beta subunit; Predicted protein
A7S3V6	Predicted protein OS=Nematostella vectensis OX=45351 GN=v1g166091 PE=3 SV=1	CSNK2A; casein kinase II subunit alpha [EC:2.7.11.1]	Casein kinase ii subunit alpha isoform x1; Predicted protein; Belongs to the protein kinase superfamily	A7SMA8	Predicted protein OS=Nematostella vectensis OX=45351 GN=v1g233373 PE=4 SV=1	RBM3; RNA-binding protein 3	Rna-binding protein 3; Predicted protein	A7SF39	Predicted protein OS=Nematostella vectensis OX=45351 GN=v1g189124 PE=4 SV=1	HADHA; enoyl-CoA hydratase / long-chain 3-hydroxyacyl-CoA dehydrogenase [EC:4.2.1.17 1.1.1.211]	Enoyl-coa hydratase / long-chain 3-hydroxyacyl-coa dehydrogenase; Predicted protein	A7SHU3	Predicted protein OS=Nematostella vectensis OX=45351 GN=v1g189983 PE=4 SV=1	RAB2A; Ras-related protein Rab-2A	Ras-related protein rab-2a; Predicted protein	A7SPN7	Glycerol-3-phosphate dehydrogenase OS=Nematostella vectensis OX=45351 GN=v1g246617 PE=3 SV=1			A7T2D6	Predicted protein OS=Nematostella vectensis OX=45351 GN=v1g248598 PE=4 SV=1		Histone-lysine n-methyltransferase, h3 lysine-36 specific; Predicted protein
A7S9Y6	Predicted protein OS=Nematostella vectensis OX=45351 GN=v1g168160 PE=3 SV=1	PMPCB, MAS1; mitochondrial-processing peptidase subunit beta [EC:3.4.24.64]	Mitochondrial-processing peptidase subunit beta; Predicted protein; Belongs to the peptidase M16 family	A7RRY6	Predicted protein OS=Nematostella vectensis OX=45351 GN=v1g236584 PE=4 SV=1	CFAP410, C21ORF2; cilla- and flagella-associated protein	Cilia- and flagella-associated protein 410; Predicted protein	A7SNX0	Predicted protein OS=Nematostella vectensis OX=45351 GN=v1g191860 PE=3 SV=1	CTSB; cathepsin B [EC:3.4.22.1]	Predicted protein; Belongs to the peptidase C1 family	A7SN59	Predicted protein OS=Nematostella vectensis OX=45351 GN=v1g191580 PE=3 SV=1	CAPN5; calpain-5 [EC:3.4.22.-]	Predicted protein; Belongs to the peptidase C2 family	A7SR35	Glycine dehydrogenase (aminomethyl-transferring) OS=Nematostella vectensis OX=45351 GN=v1g173380 PE=4 SV=1			A7RKR7	Predicted protein OS=Nematostella vectensis OX=45351 GN=v1g85009 PE=3 SV=1	LLGL; lethal(2) giant larvae protein	Lethal(2) giant larvae protein homolog 1 isoform X1; Predicted protein
A7SM46	Predicted protein OS=Nematostella vectensis OX=45351 GN=v1g172038 PE=3 SV=1	HYOU1; hypoxia up-regulated 1	Hypoxia up-regulated protein 1; Predicted protein; Belongs to the heat shock protein 70 family	A7RIK3	Predicted protein OS=Nematostella vectensis OX=45351 GN=v1g238554 PE=4 SV=1		5-methyltetrahydropteroyltriglutamate-- homocysteine methyltransferase; Predicted protein	A7RMU0	Predicted protein OS=Nematostella vectensis OX=45351 GN=v1g199437 PE=4 SV=1	NIT1, ybeM; deaminated glutathione amidase [EC:3.5.1.128]	Deaminated glutathione amidase; Predicted protein	A7SQP7	Predicted protein OS=Nematostella vectensis OX=45351 GN=v1g192469 PE=4 SV=1		Homeobox protein nkx-2.4; Predicted protein	A7SPM6	Glycylpeptide N-tetradecanoyltransferase OS=Nematostella vectensis OX=45351 GN=v1g172911 PE=3 SV=1			A7RN11	Predicted protein OS=Nematostella vectensis OX=45351 GN=v1g87276 PE=4 SV=1	AIMP1, ARC1; aminoacyl tRNA synthase complex-interacting multifunctional protein 1	Aminoacyl trna synthase complex-interacting multifunctional protein 1; Predicted protein
A7SPF6	Predicted protein OS=Nematostella vectensis OX=45351 GN=v1g172835 PE=4 SV=1		Uncharacterized protein loc5505738; Predicted protein	A7RIP3	Predicted protein OS=Nematostella vectensis OX=45351 GN=v1g238581 PE=3 SV=1		UPF0577 protein KIAA1324-like; Predicted protein	A7RTK9	Predicted protein OS=Nematostella vectensis OX=45351 GN=v1g201959 PE=4 SV=1		Hemicentin-1 isoform X1; Predicted protein	A7STK4	Predicted protein OS=Nematostella vectensis OX=45351 GN=v1g193385 PE=4 SV=1	CAPS; calcyphosin	Calcyphosin-like protein isoform x2; Predicted protein	A7RM33	Glyoxalase domain-containing protein 4 OS=Nematostella vectensis OX=45351 GN=v1g179620 PE=3 SV=1			A7RMQ8	Proteasome subunit alpha type OS=Nematostella vectensis OX=45351 GN=v1g179894 PE=3 SV=1
A7T2D5	Predicted protein OS=Nematostella vectensis OX=45351 GN=v1g176370 PE=4 SV=1	RAB6A; Ras-related protein Rab-6A	Ras-related protein rab-6a isoform x1; Predicted protein	A7RKP7	Predicted protein OS=Nematostella vectensis OX=45351 GN=v1g238966 PE=3 SV=1		Phosphoribosyl pyrophosphate synthase-associated protein 2; Predicted protein	A7RXH8	Predicted protein OS=Nematostella vectensis OX=45351 GN=v1g203613 PE=4 SV=1		Kielin/chordin-like protein; Predicted protein	A7RMX1	Predicted protein OS=Nematostella vectensis OX=45351 GN=v1g199483 PE=4 SV=1	DBNL, ABP1; drebrin-like protein	Uncharacterized protein loc5519376; Predicted protein	A7S170	GTP:AMP phosphotransferase, mitochondrial OS=Nematostella vectensis OX=45351 GN=v1g184404 PE=3 SV=1			A7RIX7	Proteasome subunit alpha type OS=Nematostella vectensis OX=45351 GN=v1g238636 PE=3 SV=1
A7RM89	Predicted protein OS=Nematostella vectensis OX=45351 GN=v1g179675 PE=4 SV=1	E4.1.3.1, aceA; isocitrate lyase [EC:4.1.3.1]	Predicted protein	A7S2Q6	Predicted protein OS=Nematostella vectensis OX=45351 GN=v1g242448 PE=4 SV=1		Tetratricopeptide repeat protein 28; Predicted protein	A7S664	Predicted protein OS=Nematostella vectensis OX=45351 GN=v1g207416 PE=4 SV=1		Hemicentin-1 isoform X1; Predicted protein	A7RPQ5	Predicted protein OS=Nematostella vectensis OX=45351 GN=v1g200262 PE=4 SV=1		Uncharacterized protein loc5518731 isoform x1; Predicted protein	A7RNI1	Histidine ammonia-lyase OS=Nematostella vectensis OX=45351 GN=v1g160941 PE=3 SV=1			A7SH57	Protein BUD31 homolog OS=Nematostella vectensis OX=45351 GN=v1g245247 PE=3 SV=1
A7RQX5	Predicted protein OS=Nematostella vectensis OX=45351 GN=v1g180943 PE=3 SV=1	PSME3; proteasome activator subunit 3 (PA28 gamma)	Proteasome activator subunit 3 (pa28 gamma); Predicted protein	A7S9P7	Predicted protein OS=Nematostella vectensis OX=45351 GN=v1g243800 PE=3 SV=1	ATPeVS1, ATP6S1; V-type H+-transporting ATPase S1 subunit	V-type h+-transporting atpase s1 subunit; Predicted protein	A7SS38	Predicted protein OS=Nematostella vectensis OX=45351 GN=v1g216602 PE=3 SV=1		Uncharacterized protein loc116613550; Predicted protein	A7SB80	Predicted protein OS=Nematostella vectensis OX=45351 GN=v1g209600 PE=3 SV=1	SORT1; sortilin	Pancreatic lipase-related protein 2; Sortilin	A7RJM8	Histone H2B OS=Nematostella vectensis OX=45351 GN=v1g198116 PE=3 SV=1			A7RTZ9	S-adenosylmethionine synthase OS=Nematostella vectensis OX=45351 GN=v1g181936 PE=3 SV=1
A7S2H8	Predicted protein OS=Nematostella vectensis OX=45351 GN=v1g184858 PE=4 SV=1	NARS, asnS; asparaginyl-tRNA synthetase [EC:6.1.1.22]	Predicted protein	A7SDG7	Predicted protein OS=Nematostella vectensis OX=45351 GN=v1g244505 PE=4 SV=1		Predicted protein	A7T3A5	Predicted protein OS=Nematostella vectensis OX=45351 GN=v1g221736 PE=4 SV=1		Uncharacterized protein loc5500166; Predicted protein	A7SQC8	Predicted protein OS=Nematostella vectensis OX=45351 GN=v1g215767 PE=4 SV=1		Proline and serine-rich protein 1; Predicted protein	A7T055	Importin subunit alpha OS=Nematostella vectensis OX=45351 GN=v1g195115 PE=3 SV=1			A7SS63	Serine hydroxymethyltransferase OS=Nematostella vectensis OX=45351 GN=v1g129467 PE=3 SV=1
A7S6D8	Predicted protein OS=Nematostella vectensis OX=45351 GN=v1g186249 PE=3 SV=1		Protein nipsnap homolog 3a; Predicted protein	A7SFC6	Predicted protein OS=Nematostella vectensis OX=45351 GN=v1g244873 PE=4 SV=1	PRLHR, GPR10; prolactin releasing hormone receptor	Prolactin releasing hormone receptor; Predicted protein	A7RY60	Predicted protein OS=Nematostella vectensis OX=45351 GN=v1g226633 PE=3 SV=1	SAP18; histone deacetylase complex subunit SAP18	Histone deacetylase complex subunit sap18; Predicted protein	A7SXB3	Predicted protein OS=Nematostella vectensis OX=45351 GN=v1g218953 PE=4 SV=1	RANGAP1; Ran GTPase-activating protein 1	Ran gtpase-activating protein 1 isoform x1; Predicted protein	A7RG06	Inosine-5'-monophosphate dehydrogenase OS=Nematostella vectensis OX=45351 GN=v1g177384 PE=3 SV=1			A7SP86	Signal sequence receptor subunit delta OS=Nematostella vectensis OX=45351 GN=v1g237405 PE=3 SV=1
A7SK19	Predicted protein OS=Nematostella vectensis OX=45351 GN=v1g190669 PE=3 SV=1	LHPP; phospholysine phosphohistidine inorganic pyrophosphate phosphatase [EC:3.6.1.1 3.1.3.-]	Phospholysine phosphohistidine inorganic pyrophosphate phosphatase; Predicted protein	A7SFV4	Predicted protein OS=Nematostella vectensis OX=45351 GN=v1g244991 PE=3 SV=1		Protein cdv3 homolog; Predicted protein	A7SCW3	Predicted protein OS=Nematostella vectensis OX=45351 GN=v1g229912 PE=4 SV=1	PLEKHF; pleckstrin homology domain-containing family F	Pleckstrin homology domain-containing family f member 2; Predicted protein	A7SA87	Predicted protein OS=Nematostella vectensis OX=45351 GN=v1g226991 PE=3 SV=1	ACADVL; very long chain acyl-CoA dehydrogenase [EC:1.3.8.9]	Very long-chain specific acyl-coa dehydrogenase, mitochondrial isoform x1; Predicted protein	A7S766	Leucyl-tRNA synthetase OS=Nematostella vectensis OX=45351 GN=v1g107058 PE=3 SV=1			A7RQN2	Thioredoxin OS=Nematostella vectensis OX=45351 GN=v1g236543 PE=3 SV=1
A7SUU3	Predicted protein OS=Nematostella vectensis OX=45351 GN=v1g193817 PE=3 SV=1	LSM6; U6 snRNA-associated Sm-like protein LSm6	U6 snRNA-associated Sm-like protein LSm6; Predicted protein	A7SJF3	Predicted protein OS=Nematostella vectensis OX=45351 GN=v1g245654 PE=4 SV=1		Phosphomethylethanolamine n-methyltransferase; Predicted protein	A7RMJ5	Predicted protein OS=Nematostella vectensis OX=45351 GN=v1g232013 PE=4 SV=1		Adhesion g protein-coupled receptor l3; Predicted protein	A7RER3	Predicted protein OS=Nematostella vectensis OX=45351 GN=v1g227824 PE=4 SV=1	RAB27A; Ras-related protein Rab-27A	Ras-related protein rab-27a isoform x2; Predicted protein	A7S338	Lissencephaly-1 homolog OS=Nematostella vectensis OX=45351 GN=v1g242515 PE=3 SV=1			A7RTW0	Transcription factor BTF3 OS=Nematostella vectensis OX=45351 GN=v1g202084 PE=3 SV=1
A7SZ09	Predicted protein OS=Nematostella vectensis OX=45351 GN=v1g194889 PE=3 SV=1	SDR16C5; all-trans-retinol dehydrogenase (NAD+) [EC:1.1.1.105]	All-trans-retinol dehydrogenase (nad+); Predicted protein; Belongs to the short-chain dehydrogenases/reductases (SDR) family	A7SK91	Predicted protein OS=Nematostella vectensis OX=45351 GN=v1g245829 PE=3 SV=1	DNAH; dynein axonemal heavy chain	Low quality protein: dynein heavy chain 10, axonemal; Predicted protein	A7SDD7	Predicted protein OS=Nematostella vectensis OX=45351 GN=v1g233046 PE=4 SV=1	PSAP, SGP1; saposin	Predicted protein	A7S0K6	Predicted protein OS=Nematostella vectensis OX=45351 GN=v1g229120 PE=4 SV=1	PACSIN; protein kinase C and casein kinase substrate in neurons protein	Predicted protein	A7S2W5	Lysine--2-oxoglutarate reductase OS=Nematostella vectensis OX=45351 GN=v1g165768 PE=3 SV=1			A7T059	Transgelin OS=Nematostella vectensis OX=45351 GN=v1g195118 PE=3 SV=1
A7RJB4	Predicted protein OS=Nematostella vectensis OX=45351 GN=v1g197953 PE=4 SV=1	CTHRC1; collagen triple helix repeat-containing protein 1	Collagen triple helix repeat-containing protein 1; Predicted protein	A7SMA7	Predicted protein OS=Nematostella vectensis OX=45351 GN=v1g246171 PE=4 SV=1	CIRBP; cold-inducible RNA-binding protein	Glycine-rich rna-binding protein 1 isoform x1; Predicted protein	A7SFE9	Predicted protein OS=Nematostella vectensis OX=45351 GN=v1g233133 PE=4 SV=1	ODF3; outer dense fiber protein 3	Outer dense fiber protein 3; Predicted protein	A7SRR4	Predicted protein OS=Nematostella vectensis OX=45351 GN=v1g235862 PE=3 SV=1	UBE2L3, UBCH7; ubiquitin-conjugating enzyme E2 L3 [EC:2.3.2.23]	Ubiquitin-conjugating enzyme e2 l3; Predicted protein; Belongs to the ubiquitin-conjugating enzyme family	A7T4M8	Metalloendopeptidase (Fragment) OS=Nematostella vectensis OX=45351 GN=v1g7293 PE=4 SV=1
A7RKN2	Predicted protein OS=Nematostella vectensis OX=45351 GN=v1g198494 PE=4 SV=1		Uncharacterized protein loc5520234; Predicted protein	A7SMS7	Predicted protein OS=Nematostella vectensis OX=45351 GN=v1g246240 PE=4 SV=1		Uncharacterized protein loc5506378 isoform x1; Predicted protein	A7S5T4	Predicted protein OS=Nematostella vectensis OX=45351 GN=v1g234969 PE=3 SV=1		Steroid 17-alpha-hydroxylase/17,20 lyase; Predicted protein; Belongs to the cytochrome P450 family	A7RX67	Predicted protein OS=Nematostella vectensis OX=45351 GN=v1g236715 PE=3 SV=1	ENTPD1_3_8, CD39; apyrase [EC:3.6.1.5]	Ectonucleoside triphosphate diphosphohydrolase 1; Predicted protein; Belongs to the GDA1/CD39 NTPase family	A7RT23	Methionine aminopeptidase 2 OS=Nematostella vectensis OX=45351 GN=v1g181577 PE=3 SV=1
A7RP35	Predicted protein OS=Nematostella vectensis OX=45351 GN=v1g199963 PE=4 SV=1	DNAL1; dynein axonemal light chain 1	Dynein light chain 1, axonemal; Predicted protein	A7SP53	Predicted protein OS=Nematostella vectensis OX=45351 GN=v1g246510 PE=3 SV=1	VPS13A_C; vacuolar protein sorting-associated protein 13A/C	Vacuolar protein sorting-associated protein 13a; Predicted protein	A7RUS8	Predicted protein OS=Nematostella vectensis OX=45351 GN=v1g236658 PE=4 SV=1		Universal stress protein slr1101; Predicted protein	A7SAS6	Predicted protein OS=Nematostella vectensis OX=45351 GN=v1g237075 PE=3 SV=1	ATPeV1E, ATP6E; V-type H+-transporting ATPase subunit E	V-type h+-transporting atpase subunit e; Predicted protein	A7SPM9	Methionine--tRNA ligase, cytoplasmic (Fragment) OS=Nematostella vectensis OX=45351 GN=v1g10320 PE=3 SV=1
A7RPQ8	Predicted protein OS=Nematostella vectensis OX=45351 GN=v1g200267 PE=4 SV=1		Uncharacterized protein loc5518684 isoform x1; Predicted protein	A7SRF9	Predicted protein OS=Nematostella vectensis OX=45351 GN=v1g246930 PE=4 SV=1		Von willebrand factor a domain-containing protein 7; Predicted protein	A7S1I9	Predicted protein OS=Nematostella vectensis OX=45351 GN=v1g236834 PE=3 SV=1	RP-L5e, RPL5; large subunit ribosomal protein L5e	Large subunit ribosomal protein l5e; Predicted protein	A7RHY2	Predicted protein OS=Nematostella vectensis OX=45351 GN=v1g238402 PE=4 SV=1		Golgin subfamily a member 6-like protein 22; Predicted protein	A7SFQ0	Mitogen-activated protein kinase OS=Nematostella vectensis OX=45351 GN=v1g116697 PE=3 SV=1
A7RRJ4	Predicted protein OS=Nematostella vectensis OX=45351 GN=v1g201060 PE=4 SV=1	SCGN; secretagogin	Predicted protein	A7SVQ6	Predicted protein OS=Nematostella vectensis OX=45351 GN=v1g247680 PE=4 SV=1		Predicted protein	A7SWW7	Predicted protein OS=Nematostella vectensis OX=45351 GN=v1g237574 PE=4 SV=1		Pituitary tumor-transforming gene 1 protein-interacting protein; Predicted protein	A7RMK0	Predicted protein OS=Nematostella vectensis OX=45351 GN=v1g239385 PE=3 SV=1	CHMP4A_B, SNF7, VPS32A_B; charged multivesicular body protein 4A/B	Charged multivesicular body protein 4b; Predicted protein; Belongs to the SNF7 family	A7SCW2	NSFL1 cofactor p47 OS=Nematostella vectensis OX=45351 GN=v1g113586 PE=4 SV=1
A7RVI6	Predicted protein OS=Nematostella vectensis OX=45351 GN=v1g202761 PE=4 SV=1	SRSF1, SFRS1, ASF, SF2; serine/arginine-rich splicing factor 1	Predicted protein	A7SXZ3	Predicted protein OS=Nematostella vectensis OX=45351 GN=v1g248025 PE=4 SV=1	NECAB; N-terminal EF-hand calcium-binding protein	N-terminal ef-hand calcium-binding protein 1 isoform x1; Predicted protein	A7SZB9	Predicted protein OS=Nematostella vectensis OX=45351 GN=v1g237612 PE=3 SV=1	PLIN2, ADRP; perilipin-2	Uncharacterized protein loc5501794; Predicted protein; Belongs to the perilipin family	A7RP49	Predicted protein OS=Nematostella vectensis OX=45351 GN=v1g239709 PE=3 SV=1	SLC8A, NCX; solute carrier family 8 (sodium/calcium exchanger)	Solute carrier family 8 (sodium/calcium exchanger); Predicted protein; Belongs to the Ca(2+):cation antiporter (CaCA) (TC 2.A.19) family	A7SG38	Peptidyl-prolyl cis-trans isomerase OS=Nematostella vectensis OX=45351 GN=v1g170242 PE=4 SV=1
A7RX71	Predicted protein OS=Nematostella vectensis OX=45351 GN=v1g203479 PE=4 SV=1		Ferric-chelate reductase 1; Predicted protein	A7RW65	Predicted protein OS=Nematostella vectensis OX=45351 GN=v1g95805 PE=3 SV=1	E2.3.1.7; carnitine O-acetyltransferase [EC:2.3.1.7]	Carnitine o-acetyltransferase; Predicted protein	A7RG96	Predicted protein OS=Nematostella vectensis OX=45351 GN=v1g238047 PE=4 SV=1		Uncharacterized protein loc5521666; Predicted protein	A7RPY1	Predicted protein OS=Nematostella vectensis OX=45351 GN=v1g239871 PE=4 SV=1		Uncharacterized protein loc5518573 isoform x1; Predicted protein; Belongs to the CRISP family	A7S8R6	Phospholipase B-like OS=Nematostella vectensis OX=45351 GN=v1g167825 PE=3 SV=1
A7S803	Predicted protein OS=Nematostella vectensis OX=45351 GN=v1g208197 PE=3 SV=1		Predicted protein	A7RZM6	Predicted protein OS=Nematostella vectensis OX=45351 GN=v1g98842 PE=4 SV=1	AS3MT; arsenite methyltransferase [EC:2.1.1.137]	Arsenite methyltransferase; Predicted protein	A7RIM6	Predicted protein OS=Nematostella vectensis OX=45351 GN=v1g238573 PE=4 SV=1		Uncharacterized protein loc5521084; Predicted protein	A7RRB8	Predicted protein OS=Nematostella vectensis OX=45351 GN=v1g240128 PE=4 SV=1	BTBD3_6; BTB/POZ domain-containing protein 3/6	Btb/poz domain-containing protein 3/6; Predicted protein	A7S2N3	Predicted protein (Fragment) OS=Nematostella vectensis OX=45351 GN=v1g102079 PE=4 SV=1	TFG; protein TFG	Predicted protein
A7SAH7	Predicted protein OS=Nematostella vectensis OX=45351 GN=v1g209267 PE=4 SV=1		CD151 antigen; Tetraspanin	A7RZW0	Predicted protein OS=Nematostella vectensis OX=45351 GN=v1g99227 PE=3 SV=1	DHRS7; dehydrogenase/reductase SDR family member 7 [EC:1.1.-.-]	Dehydrogenase/reductase sdr family member 7; Predicted protein; Belongs to the short-chain dehydrogenases/reductases (SDR) family	A7RJ98	Predicted protein OS=Nematostella vectensis OX=45351 GN=v1g238706 PE=3 SV=1	RNASET2; ribonuclease T2 [EC:4.6.1.19]	Predicted protein; Belongs to the RNase T2 family	A7RTE3	Predicted protein OS=Nematostella vectensis OX=45351 GN=v1g240549 PE=3 SV=1		Dna repair protein xrcc4; Predicted protein	A7S690	Predicted protein (Fragment) OS=Nematostella vectensis OX=45351 GN=v1g106028 PE=3 SV=1	CETN1; centrin-1	Predicted protein
A7SDT8	Predicted protein OS=Nematostella vectensis OX=45351 GN=v1g210724 PE=4 SV=1	LY6D_E_F_G6_H; lymphocyte antigen 6 complex locus protein D/E/F/G6/H	Lymphocyte antigen 6 complex locus protein d/e/f/g6/h; Predicted protein	A7SUS0	Prefoldin subunit 4 OS=Nematostella vectensis OX=45351 GN=v1g174565 PE=3 SV=1			A7RL59	Predicted protein OS=Nematostella vectensis OX=45351 GN=v1g239058 PE=3 SV=1	SLC25A11, OGC; solute carrier family 25 (mitochondrial oxoglutarate transporter), member 11	Solute carrier family 25 (mitochondrial oxoglutarate transporter), member 11; Predicted protein; Belongs to the mitochondrial carrier (TC 2.A.29) family	A7S233	Predicted protein OS=Nematostella vectensis OX=45351 GN=v1g242297 PE=4 SV=1		Predicted protein	A7S9M1	Predicted protein (Fragment) OS=Nematostella vectensis OX=45351 GN=v1g110033 PE=3 SV=1	ureG; urease accessory protein	Urease accessory protein ureg isoform x2; Predicted protein
A7SE62	Predicted protein OS=Nematostella vectensis OX=45351 GN=v1g210881 PE=3 SV=1		Collagen alpha-1(ii) chain; Predicted protein	A7T1N8	Prolyl endopeptidase OS=Nematostella vectensis OX=45351 GN=v1g248537 PE=3 SV=1			A7RP67	Predicted protein OS=Nematostella vectensis OX=45351 GN=v1g239717 PE=3 SV=1	DPY30; protein dpy-30	Protein dpy-30 homolog; Predicted protein	A7S6Z2	Predicted protein OS=Nematostella vectensis OX=45351 GN=v1g243289 PE=4 SV=1		Uncharacterized protein loc5512258; Predicted protein	A7SAW2	Predicted protein (Fragment) OS=Nematostella vectensis OX=45351 GN=v1g111502 PE=4 SV=1	ACBD3; golgi resident protein GCP60	Golgi resident protein gcp60; Predicted protein
A7SI69	Predicted protein OS=Nematostella vectensis OX=45351 GN=v1g212656 PE=4 SV=1		Uncharacterized protein loc5508049; Predicted protein	A7S863	Purple acid phosphatase OS=Nematostella vectensis OX=45351 GN=v1g208279 PE=3 SV=1			A7RQ40	Predicted protein OS=Nematostella vectensis OX=45351 GN=v1g239906 PE=4 SV=1		Uncharacterized protein loc5518554; Predicted protein	A7SAW4	Predicted protein OS=Nematostella vectensis OX=45351 GN=v1g244049 PE=4 SV=1	HNRNPL; heterogeneous nuclear ribonucleoprotein L	Heterogeneous nuclear ribonucleoprotein l; Predicted protein	A7SBG9	Predicted protein (Fragment) OS=Nematostella vectensis OX=45351 GN=v1g112221 PE=4 SV=1		Uncharacterized protein loc5510528; Predicted protein
A7SJC5	Predicted protein OS=Nematostella vectensis OX=45351 GN=v1g213159 PE=4 SV=1		Band 4.1-like protein 4a; Predicted protein	A7TAU6	S-adenosylmethionine synthase (Fragment) OS=Nematostella vectensis OX=45351 GN=v1g73760 PE=3 SV=1			A7RS00	Predicted protein OS=Nematostella vectensis OX=45351 GN=v1g240295 PE=4 SV=1		Uncharacterized protein loc5517731; Predicted protein	A7SCG8	Predicted protein OS=Nematostella vectensis OX=45351 GN=v1g244297 PE=4 SV=1		Uncharacterized protein loc5510161; Predicted protein	A7SEP3	Predicted protein (Fragment) OS=Nematostella vectensis OX=45351 GN=v1g115454 PE=4 SV=1	HNRNPF_H; heterogeneous nuclear ribonucleoprotein F/H	Predicted protein
A7SS21	Predicted protein OS=Nematostella vectensis OX=45351 GN=v1g216575 PE=4 SV=1		Uncharacterized protein loc5504698; Predicted protein	A7RN37	Seryl-tRNA synthetase OS=Nematostella vectensis OX=45351 GN=v1g239510 PE=3 SV=1			A7RSH0	Predicted protein OS=Nematostella vectensis OX=45351 GN=v1g240392 PE=4 SV=1	PEX11B; peroxin-11B	Peroxisomal membrane protein 11a; Predicted protein	A7SFU0	Predicted protein OS=Nematostella vectensis OX=45351 GN=v1g244980 PE=3 SV=1		UPF0577 protein KIAA1324-like homolog; Predicted protein	A7SJJ1	Predicted protein (Fragment) OS=Nematostella vectensis OX=45351 GN=v1g120633 PE=3 SV=1	LACC1, yfiH; purine-nucleoside/S-methyl-5'-thioadenosine phosphorylase / adenosine deaminase [EC:2.4.2.1 2.4.2.28 3.5.4.4]	Laccase domain-containing protein 1; Predicted protein
A7STC5	Predicted protein OS=Nematostella vectensis OX=45351 GN=v1g217188 PE=3 SV=1	CAMK2; calcium/calmodulin-dependent protein kinase (CaM kinase) II [EC:2.7.11.17]	Calcium/calmodulin-dependent protein kinase (cam kinase) ii; Predicted protein; Belongs to the protein kinase superfamily	A7S5L9	Signal peptidase complex catalytic subunit SEC11 OS=Nematostella vectensis OX=45351 GN=v1g166728 PE=3 SV=1			A7RUT2	Predicted protein OS=Nematostella vectensis OX=45351 GN=v1g240837 PE=4 SV=1		Universal stress protein slr1101; Predicted protein	A7SRL2	Predicted protein OS=Nematostella vectensis OX=45351 GN=v1g246955 PE=3 SV=1	COA7, SELRC1, RESA1; cytochrome c oxidase assembly factor 7	Cytochrome c oxidase assembly factor 7b isoform x2; Predicted protein	A7SJW1	Predicted protein (Fragment) OS=Nematostella vectensis OX=45351 GN=v1g120931 PE=3 SV=1	PRCP; lysosomal Pro-X carboxypeptidase [EC:3.4.16.2]	Lysosomal pro-x carboxypeptidase isoform x1; Predicted protein
A7T2A8	Predicted protein OS=Nematostella vectensis OX=45351 GN=v1g221291 PE=4 SV=1		Predicted protein	A7S6M1	Sodium/potassium-transporting ATPase subunit alpha OS=Nematostella vectensis OX=45351 GN=v1g186331 PE=2 SV=1			A7RXM0	Predicted protein OS=Nematostella vectensis OX=45351 GN=v1g241383 PE=4 SV=1		Uncharacterized protein loc5515815; Predicted protein	A7SY99	Predicted protein OS=Nematostella vectensis OX=45351 GN=v1g248060 PE=4 SV=1		Uncharacterized protein loc5502205; Predicted protein	A7SAI2	Predicted protein (Fragment) OS=Nematostella vectensis OX=45351 GN=v1g12130 PE=4 SV=1	CORO1B_1C_6; coronin-1B/1C/6	Predicted protein; Coronin
A7T8E0	Predicted protein OS=Nematostella vectensis OX=45351 GN=v1g223756 PE=4 SV=1		Perlucin-like protein; Predicted protein	A7RT61	Succinate-semialdehyde dehydrogenase OS=Nematostella vectensis OX=45351 GN=v1g162370 PE=3 SV=1			A7RZH7	Predicted protein OS=Nematostella vectensis OX=45351 GN=v1g241764 PE=4 SV=1		Predicted protein	A8DUP4	Predicted protein OS=Nematostella vectensis OX=45351 GN=v1g248749 PE=4 SV=1		Uncharacterized protein loc5499251; Predicted protein	A7SQI3	Predicted protein (Fragment) OS=Nematostella vectensis OX=45351 GN=v1g127599 PE=3 SV=1	AUB, PIWI; aubergine	Piwi-like protein 1 isoform x1; Predicted protein; Belongs to the argonaute family
A7TAL8	Predicted protein OS=Nematostella vectensis OX=45351 GN=v1g224560 PE=4 SV=1	AKR1A1, adh; alcohol dehydrogenase (NADP+) [EC:1.1.1.2]	Aldo-keto reductase family 1 member a1; Predicted protein	A7S2P3	Superoxide dismutase [Cu-Zn] OS=Nematostella vectensis OX=45351 GN=v1g234825 PE=3 SV=1			A7S1B4	Predicted protein OS=Nematostella vectensis OX=45351 GN=v1g242155 PE=4 SV=1		Universal stress protein yxie; Predicted protein	A8DUV5	Predicted protein OS=Nematostella vectensis OX=45351 GN=v1g248843 PE=4 SV=1		Uncharacterized protein loc116601139; Predicted protein	A7SUA9	Predicted protein (Fragment) OS=Nematostella vectensis OX=45351 GN=v1g132059 PE=3 SV=1		Translationally-controlled tumor protein homolog; Predicted protein; Belongs to the TCTP family
A8DVQ6	Predicted protein OS=Nematostella vectensis OX=45351 GN=v1g225779 PE=3 SV=1		50S ribosomal protein L3; Predicted protein; Belongs to the universal ribosomal protein uL3 family	A7SK24	Tetraspanin OS=Nematostella vectensis OX=45351 GN=v1g233307 PE=3 SV=1			A7S573	Predicted protein OS=Nematostella vectensis OX=45351 GN=v1g242949 PE=4 SV=1		Zinc finger ccch domain-containing protein 10; Predicted protein	A7S1L7	Prohibitin OS=Nematostella vectensis OX=45351 GN=v1g242223 PE=3 SV=1			A7SWY1	Predicted protein (Fragment) OS=Nematostella vectensis OX=45351 GN=v1g135928 PE=4 SV=1	HUGT; UDP-glucose:glycoprotein glucosyltransferase [EC:2.4.1.-]	Predicted protein
A7RXS1	Predicted protein OS=Nematostella vectensis OX=45351 GN=v1g228964 PE=3 SV=1	CDK1, CDC2; cyclin-dependent kinase 1 [EC:2.7.11.22 2.7.11.23]	Cyclin-dependent kinase 1 isoform x1; Predicted protein; Belongs to the protein kinase superfamily	A7RXX2	Thymidine phosphorylase OS=Nematostella vectensis OX=45351 GN=v1g241446 PE=3 SV=1			A7S5E7	Predicted protein OS=Nematostella vectensis OX=45351 GN=v1g242983 PE=4 SV=1		Uncharacterized protein loc5512855; Predicted protein	A7RN43	Pyrroline-5-carboxylate reductase OS=Nematostella vectensis OX=45351 GN=v1g160797 PE=3 SV=1			A7SWX7	Predicted protein (Fragment) OS=Nematostella vectensis OX=45351 GN=v1g135950 PE=4 SV=1	HUGT; UDP-glucose:glycoprotein glucosyltransferase [EC:2.4.1.-]	Udp-glucose:glycoprotein glucosyltransferase 1; Predicted protein
A7S0M2	Predicted protein OS=Nematostella vectensis OX=45351 GN=v1g229125 PE=4 SV=1	PRSS1_2_3; trypsin [EC:3.4.21.4]	Cub and peptidase domain-containing protein 2; Predicted protein; Belongs to the peptidase S1 family	A7RF51	Transaldolase OS=Nematostella vectensis OX=45351 GN=v1g177058 PE=3 SV=1			A7S620	Predicted protein OS=Nematostella vectensis OX=45351 GN=v1g243116 PE=4 SV=1		Uncharacterized protein loc5512641 isoform x1; Predicted protein	A7S8Z2	RuvB-like helicase OS=Nematostella vectensis OX=45351 GN=v1g243663 PE=3 SV=1			A7TAA0	Predicted protein (Fragment) OS=Nematostella vectensis OX=45351 GN=v1g152177 PE=3 SV=1	ATPeF1A, ATP5A1, ATP1; F-type H+-transporting ATPase subunit alpha	F-type h+-transporting atpase subunit alpha; Predicted protein
A7S1T2	Predicted protein OS=Nematostella vectensis OX=45351 GN=v1g229200 PE=3 SV=1	VPS26A_B; vacuolar protein sorting-associated protein 26A/B	Vacuolar protein sorting-associated protein 26b-like; Predicted protein	A7S698	Tubulin alpha chain OS=Nematostella vectensis OX=45351 GN=v1g186200 PE=3 SV=1			A7SA07	Predicted protein OS=Nematostella vectensis OX=45351 GN=v1g243872 PE=4 SV=1		Uncharacterized protein loc5511130; Predicted protein	A7SEP6	S-adenosylmethionine synthase OS=Nematostella vectensis OX=45351 GN=v1g233095 PE=3 SV=1			A8DVJ2	Predicted protein (Fragment) OS=Nematostella vectensis OX=45351 GN=v1g156512 PE=4 SV=1		26S proteasome non-ATPase regulatory subunit 2-like isoform X1; Predicted protein
A7SEX7	Predicted protein OS=Nematostella vectensis OX=45351 GN=v1g230057 PE=3 SV=1	IDE, ide; insulysin [EC:3.4.24.56]	Insulin-degrading enzyme; Predicted protein; Belongs to the peptidase M16 family	A7RRD4	Vacuolar protein sorting-associated protein 35 OS=Nematostella vectensis OX=45351 GN=v1g161846 PE=3 SV=1			A7SC13	Predicted protein OS=Nematostella vectensis OX=45351 GN=v1g244226 PE=4 SV=1		Predicted protein	A7S1V0	SEC22 vesicle-trafficking protein homolog B OS=Nematostella vectensis OX=45351 GN=v1g165401 PE=3 SV=1			A8DWA9	Predicted protein (Fragment) OS=Nematostella vectensis OX=45351 GN=v1g157231 PE=4 SV=1	GGT1_5, CD224; gamma-glutamyltranspeptidase / glutathione hydrolase / leukotriene-C4 hydrolase [EC:2.3.2.2 3.4.19.13 3.4.19.14]	Gamma-glutamyltranspeptidase / glutathione hydrolase / leukotriene-c4 hydrolase; Predicted protein
A7SW65	Predicted protein OS=Nematostella vectensis OX=45351 GN=v1g231022 PE=4 SV=1	ACSBG; long-chain-fatty-acid--CoA ligase ACSBG [EC:6.2.1.3]	Predicted protein					A7SCK6	Predicted protein OS=Nematostella vectensis OX=45351 GN=v1g244319 PE=4 SV=1	RAC1; Ras-related C3 botulinum toxin substrate 1	Ras-related c3 botulinum toxin substrate 1; Predicted protein; Belongs to the small GTPase superfamily. Rho family	A7RZ11	Signal peptidase complex subunit 2 OS=Nematostella vectensis OX=45351 GN=v1g241683 PE=3 SV=1			A7S1W8	Predicted protein (Fragment) OS=Nematostella vectensis OX=45351 GN=v1g184640 PE=3 SV=1	GRO, TLE; groucho	Transducin-like enhancer protein 4; Predicted protein
A7T4G2	Predicted protein OS=Nematostella vectensis OX=45351 GN=v1g231431 PE=4 SV=1	PPP6C; serine/threonine-protein phosphatase 6 catalytic subunit [EC:3.1.3.16]	Predicted protein					A7SGM7	Predicted protein OS=Nematostella vectensis OX=45351 GN=v1g245160 PE=3 SV=1		Fumarylacetoacetate hydrolase domain-containing protein 2; Predicted protein	A7RJT7	Splicing factor U2AF subunit OS=Nematostella vectensis OX=45351 GN=v1g228171 PE=3 SV=1			A7S2E0	Predicted protein (Fragment) OS=Nematostella vectensis OX=45351 GN=v1g21003 PE=4 SV=1	KRAB; KRAB domain-containing zinc finger protein	Zinc finger and scan domain-containing protein 2 isoform x1; Predicted protein
A7RKZ0	Predicted protein OS=Nematostella vectensis OX=45351 GN=v1g231946 PE=3 SV=1	PAPSS; 3'-phosphoadenosine 5'-phosphosulfate synthase [EC:2.7.7.4 2.7.1.25]	Low quality protein: bifunctional 3'-phosphoadenosine 5'-phosphosulfate synthase; Predicted protein					A7SLR0	Predicted protein OS=Nematostella vectensis OX=45351 GN=v1g246076 PE=4 SV=1		Uncharacterized protein loc5506748 isoform x1; Predicted protein	A7RNN8	Tetraspanin OS=Nematostella vectensis OX=45351 GN=v1g88003 PE=3 SV=1			A7SRV3	Predicted protein (Fragment) OS=Nematostella vectensis OX=45351 GN=v1g216470 PE=3 SV=1		Uncharacterized protein loc116612413 isoform x1; Predicted protein; Belongs to the heparin-binding growth factors family
A7RQ98	Predicted protein OS=Nematostella vectensis OX=45351 GN=v1g234328 PE=4 SV=1	DNALI; dynein axonemal light intermediate chain 1	33 kDa inner dynein arm light chain, axonemal; Predicted protein					A7SSR7	Predicted protein OS=Nematostella vectensis OX=45351 GN=v1g247194 PE=4 SV=1		Basic salivary proline-rich protein 2; Predicted protein	A7SJX9	Tubulin beta chain OS=Nematostella vectensis OX=45351 GN=v1g245773 PE=3 SV=1			A7SZF3	Predicted protein (Fragment) OS=Nematostella vectensis OX=45351 GN=v1g219949 PE=4 SV=1		Predicted protein
A7S513	Predicted protein OS=Nematostella vectensis OX=45351 GN=v1g234931 PE=3 SV=1	PRKAR; cAMP-dependent protein kinase regulator	Camp-dependent protein kinase type ii regulatory subunit; Predicted protein					A7STC8	Predicted protein OS=Nematostella vectensis OX=45351 GN=v1g247291 PE=3 SV=1		Uncharacterized protein loc5504203; Predicted protein					A7T5G1	Predicted protein (Fragment) OS=Nematostella vectensis OX=45351 GN=v1g222586 PE=4 SV=1		Predicted protein
A7RT65	Predicted protein OS=Nematostella vectensis OX=45351 GN=v1g236613 PE=3 SV=1	ARL8; ADP-ribosylation factor-like protein 8	Adp-ribosylation factor-like protein 8b-a; Predicted protein; Belongs to the small GTPase superfamily. Arf family					A7SV53	Predicted protein OS=Nematostella vectensis OX=45351 GN=v1g247595 PE=3 SV=1		Alpha-endosulfine; Predicted protein; Protein phosphatase inhibitor that specifically inhibits protein phosphatase 2A (PP2A) during mitosis					A7TBM4	Predicted protein (Fragment) OS=Nematostella vectensis OX=45351 GN=v1g224897 PE=4 SV=1		Serine/threonine-protein kinase pak 1-like isoform x1; Predicted protein
A7S2N6	Predicted protein OS=Nematostella vectensis OX=45351 GN=v1g236875 PE=3 SV=1	MYCBP; c-Myc-binding protein	C-myc-binding protein; Predicted protein					A7T1D0	Predicted protein OS=Nematostella vectensis OX=45351 GN=v1g248489 PE=4 SV=1		Uncharacterized protein loc5500965; Predicted protein					A7TC10	Predicted protein (Fragment) OS=Nematostella vectensis OX=45351 GN=v1g225027 PE=4 SV=1		Beta-adrenergic receptor kinase 2-like; Predicted protein
A7S8B5	Predicted protein OS=Nematostella vectensis OX=45351 GN=v1g237021 PE=4 SV=1		28 kDa heat- and acid-stable phosphoprotein; Predicted protein					A7RKY1	Predicted protein OS=Nematostella vectensis OX=45351 GN=v1g85643 PE=4 SV=1		Predicted protein					A7S8B6	Predicted protein (Fragment) OS=Nematostella vectensis OX=45351 GN=v1g23194 PE=4 SV=1		Zinc finger protein 37 isoform x1; Predicted protein
A7SG87	Predicted protein OS=Nematostella vectensis OX=45351 GN=v1g237233 PE=4 SV=1	ERP44, TXNDC4; endoplasmic reticulum resident protein 44	Endoplasmic reticulum resident protein 44; Predicted protein					A7RTE4	Predicted protein OS=Nematostella vectensis OX=45351 GN=v1g92892 PE=4 SV=1	ATG3; ubiquitin-like-conjugating enzyme ATG3	Autophagy-related protein 3					A7S406	Predicted protein (Fragment) OS=Nematostella vectensis OX=45351 GN=v1g242699 PE=4 SV=1	TXNDC10; thioredoxin domain-containing protein 10 [EC:5.3.4.1]	Thioredoxin domain-containing protein 10; Predicted protein
A7SHW6	Predicted protein OS=Nematostella vectensis OX=45351 GN=v1g237274 PE=3 SV=1		Diaminopimelate decarboxylase isoform x1; Predicted protein; Belongs to the Orn/Lys/Arg decarboxylase class-II family					A7S089	Probable RNA polymerase II nuclear localization protein SLC7A6OS OS=Nematostella vectensis OX=45351 GN=v1g241939 PE=3 SV=1							A7S377	Predicted protein (Fragment) OS=Nematostella vectensis OX=45351 GN=v1g26281 PE=4 SV=1		Predicted protein; Belongs to the peptidase S1 family
A7SSP6	Predicted protein OS=Nematostella vectensis OX=45351 GN=v1g237483 PE=4 SV=1	RCC1; regulator of chromosome condensation	Regulator of chromosome condensation; Predicted protein					A7SX61	Ribose-5-phosphate isomerase OS=Nematostella vectensis OX=45351 GN=v1g247895 PE=3 SV=1							A7SAJ5	Predicted protein (Fragment) OS=Nematostella vectensis OX=45351 GN=v1g26678 PE=4 SV=1	SRSF4_5_6, SFRS4_5_6; serine/arginine-rich splicing factor 4/5/6	Predicted protein
A7RFX5	Predicted protein OS=Nematostella vectensis OX=45351 GN=v1g237955 PE=3 SV=1	ACSF2; medium-chain acyl-CoA ligase, mitochondrial [EC:6.2.1.2]	Predicted protein					A7RKF6	RNA-splicing ligase RtcB homolog OS=Nematostella vectensis OX=45351 GN=v1g198406 PE=3 SV=1							A7RNN3	Predicted protein (Fragment) OS=Nematostella vectensis OX=45351 GN=v1g34292 PE=3 SV=1	CPD; carboxypeptidase D [EC:3.4.17.22]	Carboxypeptidase d; Predicted protein
A7RJ77	Predicted protein OS=Nematostella vectensis OX=45351 GN=v1g238693 PE=4 SV=1		Uncharacterized protein loc5496282; Predicted protein					A7RU24	Succinate dehydrogenase [ubiquinone] iron-sulfur subunit, mitochondrial OS=Nematostella vectensis OX=45351 GN=v1g181975 PE=3 SV=1							A7T4M7	Predicted protein (Fragment) OS=Nematostella vectensis OX=45351 GN=v1g48576 PE=4 SV=1		Predicted protein
A7RJQ6	Predicted protein OS=Nematostella vectensis OX=45351 GN=v1g238787 PE=3 SV=1		Predicted protein					A7SLY9	Succinate--CoA ligase [ADP/GDP-forming] subunit alpha, mitochondrial OS=Nematostella vectensis OX=45351 GN=v1g246109 PE=3 SV=1							A7S1E7	Predicted protein (Fragment) OS=Nematostella vectensis OX=45351 GN=v1g53549 PE=3 SV=1	CYP20A; cytochrome P450 family 20 subfamily A [EC:1.14.-.-]	Cytochrome p450 family 20 subfamily a; Predicted protein
A7RLP2	Predicted protein OS=Nematostella vectensis OX=45351 GN=v1g239170 PE=4 SV=1		Counting factor 60; Predicted protein; Belongs to the histidine acid phosphatase family					A7RMN1	Toxin NvePTx1 OS=Nematostella vectensis OX=45351 GN=v1g239401 PE=1 SV=2							A7SPW3	Predicted protein (Fragment) OS=Nematostella vectensis OX=45351 GN=v1g53582 PE=3 SV=1	VPS24, CHMP3; charged multivesicular body protein 3	Charged multivesicular body protein 3; Predicted protein
A7RPB4	Predicted protein OS=Nematostella vectensis OX=45351 GN=v1g239738 PE=3 SV=1	ACAT, atoB; acetyl-CoA C-acetyltransferase [EC:2.3.1.9]	Acetyl-coa acetyltransferase, mitochondrial; Predicted protein; Belongs to the thiolase family					A7ST23	Tryptophanyl-tRNA synthetase OS=Nematostella vectensis OX=45351 GN=v1g217048 PE=3 SV=1							A7RES4	Predicted protein (Fragment) OS=Nematostella vectensis OX=45351 GN=v1g60205 PE=4 SV=1	LOXHD1; lipoxygenase homology domain-containing protein 1	Predicted protein
A7RS81	Predicted protein OS=Nematostella vectensis OX=45351 GN=v1g240344 PE=4 SV=1		Uncharacterized protein ddb_g0284459; Predicted protein					A7RTS4	U6 snRNA-associated Sm-like protein LSm4 OS=Nematostella vectensis OX=45351 GN=LSM4 PE=3 SV=1							A7RFR9	Predicted protein (Fragment) OS=Nematostella vectensis OX=45351 GN=v1g79630 PE=3 SV=1	AIFM1, PDCD8; apoptosis-inducing factor 1 [EC:1.-.-.-]	Apoptosis-inducing factor 1, mitochondrial; Predicted protein
A7RXB2	Predicted protein OS=Nematostella vectensis OX=45351 GN=v1g241323 PE=4 SV=1	PAIP1; polyadenylate-binding protein-interacting protein 1	Polyadenylate-binding protein-interacting protein 1 isoform x1; Predicted protein					A7RV73	Vacuolar protein sorting-associated protein 29 OS=Nematostella vectensis OX=45351 GN=v1g182326 PE=3 SV=1							A7RFZ0	Predicted protein (Fragment) OS=Nematostella vectensis OX=45351 GN=v1g80250 PE=4 SV=1	ECE; endothelin-converting enzyme [EC:3.4.24.71]	Endothelin-converting enzyme; Predicted protein
A7RYG4	Predicted protein OS=Nematostella vectensis OX=45351 GN=v1g241557 PE=4 SV=1	NCAM, CD56; neural cell adhesion molecule	Neural cell adhesion molecule; Predicted protein													A7RIM4	Predicted protein (Fragment) OS=Nematostella vectensis OX=45351 GN=v1g82599 PE=4 SV=1	STK10, LOK; serine/threonine kinase 10 [EC:2.7.11.1]	Predicted protein
A7S047	Predicted protein OS=Nematostella vectensis OX=45351 GN=v1g241916 PE=3 SV=1		Basic leucine zipper and w2 domain-containing protein 1; Predicted protein													A7RMA2	Predicted protein (Fragment) OS=Nematostella vectensis OX=45351 GN=v1g86396 PE=4 SV=1	AIFM3; apoptosis-inducing factor 3	Apoptosis-inducing factor 3 isoform x1; Predicted protein
A7S251	Predicted protein OS=Nematostella vectensis OX=45351 GN=v1g242304 PE=3 SV=1	DCTN2; dynactin 2	Dynactin subunit 2; Predicted protein													A7RSJ6	Predicted protein (Fragment) OS=Nematostella vectensis OX=45351 GN=v1g91851 PE=3 SV=1		Stomatin-like protein 2, mitochondrial; Predicted protein
A7S2F3	Predicted protein OS=Nematostella vectensis OX=45351 GN=v1g242375 PE=4 SV=1		Uncharacterized protein loc5513981; Predicted protein													A7RSF4	Predicted protein (Fragment) OS=Nematostella vectensis OX=45351 GN=v1g91949 PE=3 SV=1	MAP2K1, MEK1; mitogen-activated protein kinase kinase 1 [EC:2.7.12.2]	Dual specificity mitogen-activated protein kinase kinase 1; Predicted protein; Belongs to the protein kinase superfamily
A7S470	Predicted protein OS=Nematostella vectensis OX=45351 GN=v1g242737 PE=3 SV=1	GNAQ; guanine nucleotide-binding protein G(q) subunit alpha	Guanine nucleotide-binding protein g(q) subunit alpha; Predicted protein													A7RUS7	Predicted protein (Fragment) OS=Nematostella vectensis OX=45351 GN=v1g94276 PE=4 SV=1	TRA2; transformer-2 protein	Predicted protein
A7S5V7	Predicted protein OS=Nematostella vectensis OX=45351 GN=v1g243073 PE=4 SV=1		Predicted protein													A7RYC2	Predicted protein (Fragment) OS=Nematostella vectensis OX=45351 GN=v1g97774 PE=3 SV=1		Putative aldolase class 2 protein pa3430 isoform x2; Predicted protein
A7S6D7	Predicted protein OS=Nematostella vectensis OX=45351 GN=v1g243181 PE=4 SV=1		UPF0612 protein C569.003; Predicted protein													A7RZA7	Predicted protein (Fragment) OS=Nematostella vectensis OX=45351 GN=v1g98739 PE=4 SV=1		Uncharacterized protein loc5515170; Predicted protein
A7SD20	Predicted protein OS=Nematostella vectensis OX=45351 GN=v1g244411 PE=4 SV=1	NDUFB8; NADH dehydrogenase (ubiquinone) 1 beta subcomplex subunit 8	Nadh dehydrogenase [ubiquinone] 1 beta subcomplex subunit 8, mitochondrial; Predicted protein													A7RZI7	Predicted protein (Fragment) OS=Nematostella vectensis OX=45351 GN=v1g98829 PE=3 SV=1		Failed axon connections homolog isoform x1; Predicted protein
A7SDN5	Predicted protein OS=Nematostella vectensis OX=45351 GN=v1g244535 PE=3 SV=1		Predicted protein													A7S0B4	Predicted protein (Fragment) OS=Nematostella vectensis OX=45351 GN=v1g99837 PE=4 SV=1		Programmed cell death protein 6; Predicted protein
A7SF50	Predicted protein OS=Nematostella vectensis OX=45351 GN=v1g244837 PE=4 SV=1	HTATIP2; oxidoreductase [EC:1.1.1.-]	Oxidoreductase htatip2; Predicted protein													A7S107	Predicted protein OS=Nematostella vectensis OX=45351 GN=v1g100359 PE=3 SV=1	SEC31; protein transport protein SEC31	Predicted protein
A7SFM0	Predicted protein OS=Nematostella vectensis OX=45351 GN=v1g244933 PE=4 SV=1		17-beta-hydroxysteroid dehydrogenase 14 isoform X1; Predicted protein													A7S3D9	Predicted protein OS=Nematostella vectensis OX=45351 GN=v1g103120 PE=3 SV=1	SEC24; protein transport protein SEC24	Protein transport protein sec24c; Predicted protein
A7SIR0	Predicted protein OS=Nematostella vectensis OX=45351 GN=v1g245525 PE=3 SV=1		Uncharacterized protein loc5507836; Predicted protein													A7S773	Predicted protein OS=Nematostella vectensis OX=45351 GN=v1g107265 PE=3 SV=1	E3.2.1.14; chitinase [EC:3.2.1.14]	Predicted protein; Belongs to the glycosyl hydrolase 18 family
A7SJN0	Predicted protein OS=Nematostella vectensis OX=45351 GN=v1g245710 PE=4 SV=1		Predicted protein													A7SD33	Predicted protein OS=Nematostella vectensis OX=45351 GN=v1g113937 PE=4 SV=1	U2AF1; splicing factor U2AF 35 kDa subunit	Splicing factor u2af 35 kda subunit isoform x1; Predicted protein
A7SND9	Predicted protein OS=Nematostella vectensis OX=45351 GN=v1g246356 PE=4 SV=1		Nascent polypeptide-associated complex subunit alpha, muscle-specific form; Predicted protein													A7SDI6	Predicted protein OS=Nematostella vectensis OX=45351 GN=v1g114223 PE=4 SV=1	ECH1; Delta3,5-Delta2,4-dienoyl-CoA isomerase [EC:5.3.3.21]	Delta(3,5)-Delta(2,4)-dienoyl-CoA isomerase, mitochondrial; Predicted protein
A7SP22	Predicted protein OS=Nematostella vectensis OX=45351 GN=v1g246490 PE=4 SV=1		Predicted protein													A7SE54	Predicted protein OS=Nematostella vectensis OX=45351 GN=v1g114899 PE=4 SV=1	ECI1, DCI; Delta3-Delta2-enoyl-CoA isomerase [EC:5.3.3.8]	Predicted protein
A7SS22	Predicted protein OS=Nematostella vectensis OX=45351 GN=v1g247043 PE=4 SV=1		Uncharacterized protein loc5504690; Predicted protein													A7SHB8	Predicted protein OS=Nematostella vectensis OX=45351 GN=v1g118418 PE=3 SV=1	ACADSB; short-chain 2-methylacyl-CoA dehydrogenase [EC:1.3.8.5]	Short/branched chain specific acyl-coa dehydrogenase, mitochondrial; Predicted protein
A7REY6	Predicted protein OS=Nematostella vectensis OX=45351 GN=v1g78952 PE=4 SV=1	SULT1; sulfotransferase [EC:2.8.2.-]	Sulfotransferase 1c2a; Predicted protein													A7SJI9	Predicted protein OS=Nematostella vectensis OX=45351 GN=v1g120584 PE=3 SV=1	HADHB; acetyl-CoA acyltransferase [EC:2.3.1.16]	Trifunctional enzyme subunit beta, mitochondrial; Predicted protein; Belongs to the thiolase family
A7RLN7	Predicted protein OS=Nematostella vectensis OX=45351 GN=v1g86017 PE=3 SV=1	dnaK, HSPA9; molecular chaperone DnaK	Stress-70 protein, mitochondrial; Predicted protein; Belongs to the heat shock protein 70 family													A7SP68	Predicted protein OS=Nematostella vectensis OX=45351 GN=v1g125775 PE=4 SV=1	PPWD1; peptidylprolyl isomerase domain and WD repeat-containing protein 1 [EC:5.2.1.8]	Peptidylprolyl isomerase domain and wd repeat-containing protein 1 isoform x1; Predicted protein
A7RPZ7	Predicted protein OS=Nematostella vectensis OX=45351 GN=v1g89518 PE=4 SV=1	PABPN1, PABP2; polyadenylate-binding protein 2	Polyadenylate-binding protein 2-b; Predicted protein													A7SPP2	Predicted protein OS=Nematostella vectensis OX=45351 GN=v1g126198 PE=3 SV=1		Putative n-acetylated-alpha-linked acidic dipeptidase isoform x1; Predicted protein
A7RLW2	Pre-mRNA-processing factor 19 OS=Nematostella vectensis OX=45351 GN=v1g199033 PE=3 SV=1															A7SR99	Predicted protein OS=Nematostella vectensis OX=45351 GN=v1g128552 PE=4 SV=1	CAND1, TIP120A; cullin-associated NEDD8-dissociated protein 1	Predicted protein
A7RX26	Probable imidazolonepropionase OS=Nematostella vectensis OX=45351 GN=amdhd1 PE=3 SV=1															A7STK5	Predicted protein OS=Nematostella vectensis OX=45351 GN=v1g131227 PE=4 SV=1	CAPS; calcyphosin	Calcyphosin-like protein; Predicted protein
A7S1L2	Proteasome subunit beta OS=Nematostella vectensis OX=45351 GN=v1g101124 PE=3 SV=1															A7SXK7	Predicted protein OS=Nematostella vectensis OX=45351 GN=v1g136849 PE=4 SV=1	NUDT9; ADP-ribose pyrophosphatase [EC:3.6.1.13]	Adp-ribose pyrophosphatase, mitochondrial isoform x2; Predicted protein
A7SBR9	Protein-synthesizing GTPase OS=Nematostella vectensis OX=45351 GN=v1g187927 PE=4 SV=1															A7REX4	Predicted protein OS=Nematostella vectensis OX=45351 GN=v1g157740 PE=4 SV=1	SQOR; eukaryotic sulfide quinone oxidoreductase [EC:1.8.5.8]	Sulfide:quinone oxidoreductase, mitochondrial; Predicted protein
A7SRY1	Pyruvate dehydrogenase E1 component subunit alpha OS=Nematostella vectensis OX=45351 GN=v1g233533 PE=4 SV=1															A7RID7	Predicted protein OS=Nematostella vectensis OX=45351 GN=v1g159077 PE=3 SV=1	ACTR1, ARP1; centractin	Predicted protein; Belongs to the actin family
A7SJL0	Replication protein A subunit OS=Nematostella vectensis OX=45351 GN=v1g171280 PE=3 SV=1															A7RKK0	Predicted protein OS=Nematostella vectensis OX=45351 GN=v1g159788 PE=3 SV=1	DNAH; dynein axonemal heavy chain	Dynein heavy chain, axonemal; Predicted protein
A7SWD4	Ribosomal protein L15 OS=Nematostella vectensis OX=45351 GN=v1g194235 PE=3 SV=1															A7RTU8	Predicted protein OS=Nematostella vectensis OX=45351 GN=v1g162633 PE=4 SV=1		Uncharacterized protein loc5517127; Predicted protein
A7RIU5	RNA helicase OS=Nematostella vectensis OX=45351 GN=v1g236387 PE=3 SV=1															A7RWV1	Predicted protein OS=Nematostella vectensis OX=45351 GN=v1g163628 PE=4 SV=1		Uncharacterized protein loc5516000; Predicted protein
A7RLX3	Septin OS=Nematostella vectensis OX=45351 GN=v1g239234 PE=3 SV=1															A7S0N6	Predicted protein OS=Nematostella vectensis OX=45351 GN=v1g164994 PE=4 SV=1	AIFM2; apoptosis-inducing factor 2	Apoptosis-inducing factor 2; Predicted protein
A7SQ97	Serine/threonine-protein phosphatase 2A 55 kDa regulatory subunit B OS=Nematostella vectensis OX=45351 GN=v1g192352 PE=3 SV=1															A7S2J5	Predicted protein OS=Nematostella vectensis OX=45351 GN=v1g165664 PE=3 SV=1	RP-S14e, RPS14; small subunit ribosomal protein S14e	Small subunit ribosomal protein s14e; Predicted protein; Belongs to the universal ribosomal protein uS11 family
A7RVJ0	Serine/threonine-protein phosphatase OS=Nematostella vectensis OX=45351 GN=v1g240980 PE=3 SV=1															A7S392	Predicted protein OS=Nematostella vectensis OX=45351 GN=v1g165897 PE=3 SV=1	GAA; lysosomal alpha-glucosidase [EC:3.2.1.20]	Lysosomal alpha-glucosidase; Predicted protein; Belongs to the glycosyl hydrolase 31 family
A7RZT6	Small monomeric GTPase OS=Nematostella vectensis OX=45351 GN=v1g236786 PE=3 SV=1															A7S4K0	Predicted protein OS=Nematostella vectensis OX=45351 GN=v1g166341 PE=4 SV=1	AKR7; aflatoxin B1 aldehyde reductase	Predicted protein
A7SCJ3	Succinate dehydrogenase (quinone) (Fragment) OS=Nematostella vectensis OX=45351 GN=v1g113343 PE=3 SV=1															A7S5W0	Predicted protein OS=Nematostella vectensis OX=45351 GN=v1g166808 PE=4 SV=1		Predicted protein
A7S2P2	Superoxide dismutase [Cu-Zn] OS=Nematostella vectensis OX=45351 GN=v1g165732 PE=3 SV=1															A7S778	Predicted protein OS=Nematostella vectensis OX=45351 GN=v1g167304 PE=3 SV=1	PTC2_3; protein phosphatase PTC2/3 [EC:3.1.3.16]	Probable protein phosphatase 2c t23f11.1 isoform x1; Predicted protein
A7SV20	Tyrosine--tRNA ligase OS=Nematostella vectensis OX=45351 GN=v1g217910 PE=3 SV=1															A7S7E1	Predicted protein OS=Nematostella vectensis OX=45351 GN=v1g167354 PE=4 SV=1		Plastin-1 isoform X1; Predicted protein
A7RIQ2	U6 snRNA-associated Sm-like protein LSm8 OS=Nematostella vectensis OX=45351 GN=LSM8 PE=3 SV=1															A7SBT1	Predicted protein OS=Nematostella vectensis OX=45351 GN=v1g168735 PE=3 SV=1	CRYL1; L-gulonate 3-dehydrogenase [EC:1.1.1.45]	L-gulonate 3-dehydrogenase; Predicted protein
A7SNG8	Ubiquitin carboxyl-terminal hydrolase 7 OS=Nematostella vectensis OX=45351 GN=v1g172482 PE=3 SV=1															A7SLB5	Predicted protein OS=Nematostella vectensis OX=45351 GN=v1g171824 PE=4 SV=1		Spermatogenesis-associated protein 20; Predicted protein
A7SGA5	Ubiquitin-like modifier-activating enzyme 5 (Fragment) OS=Nematostella vectensis OX=45351 GN=v1g189522 PE=3 SV=1															A7SLW2	Predicted protein OS=Nematostella vectensis OX=45351 GN=v1g171977 PE=3 SV=1	UBE2M, UBC12; ubiquitin-conjugating enzyme E2 M [EC:2.3.2.34]	NEDD8-conjugating enzyme Ubc12 isoform X1; Predicted protein; Belongs to the ubiquitin-conjugating enzyme family
A7SYI1	Uricase OS=Nematostella vectensis OX=45351 GN=v1g175574 PE=3 SV=1															A7SN77	Predicted protein OS=Nematostella vectensis OX=45351 GN=v1g172396 PE=3 SV=1	RP-S19e, RPS19; small subunit ribosomal protein S19e	Small subunit ribosomal protein s19e; Predicted protein
A7S0D1	V-type proton ATPase subunit H OS=Nematostella vectensis OX=45351 GN=v1g164874 PE=3 SV=1															A7SP30	Predicted protein OS=Nematostella vectensis OX=45351 GN=v1g172704 PE=4 SV=1	DHRS1; dehydrogenase/reductase SDR family member 1 [EC:1.1.-.-]	Predicted protein
																A7SQB8	Predicted protein OS=Nematostella vectensis OX=45351 GN=v1g173158 PE=4 SV=1	CCBL; kynurenine---oxoglutarate transaminase / cysteine-S-conjugate beta-lyase / glutamine---phenylpyruvate transaminase [EC:2.6.1.7 4.4.1.13 2.6.1.64]	Kynurenine---oxoglutarate transaminase / cysteine-s-conjugate beta-lyase / glutamine---phenylpyruvate transaminase; Predicted protein
																A7SQP8	Predicted protein OS=Nematostella vectensis OX=45351 GN=v1g173264 PE=4 SV=1		Ras suppressor protein 1; Predicted protein
																A7SRI6	Predicted protein OS=Nematostella vectensis OX=45351 GN=v1g173515 PE=4 SV=1	FBXO36; F-box protein 36	F-box only protein 36; Predicted protein
																A7STG9	Predicted protein OS=Nematostella vectensis OX=45351 GN=v1g174161 PE=3 SV=1		Glia maturation factor beta; Belongs to the actin-binding proteins ADF family. GMF subfamily
																A7STV3	Predicted protein OS=Nematostella vectensis OX=45351 GN=v1g174288 PE=4 SV=1	TRAF4; TNF receptor-associated factor 4	Tnf receptor-associated factor 4 isoform x2; Predicted protein
																A7T162	Predicted protein OS=Nematostella vectensis OX=45351 GN=v1g176140 PE=3 SV=1	CYP3A; cytochrome P450 family 3 subfamily A [EC:1.14.14.1]	Cytochrome p450 family 3 subfamily a; Predicted protein; Belongs to the cytochrome P450 family
																A7T284	Predicted protein OS=Nematostella vectensis OX=45351 GN=v1g176351 PE=4 SV=1	PSMC1, RPT2; 26S proteasome regulatory subunit T2	26S proteasome regulatory subunit T2; Predicted protein
																A7RGP1	Predicted protein OS=Nematostella vectensis OX=45351 GN=v1g177644 PE=3 SV=1	mmsA, iolA, ALDH6A1; malonate-semialdehyde dehydrogenase (acetylating) / methylmalonate-semialdehyde dehydrogenase [EC:1.2.1.18 1.2.1.27]	Malonate-semialdehyde dehydrogenase (acetylating) / methylmalonate-semialdehyde dehydrogenase; Predicted protein
																A7RJZ8	Predicted protein OS=Nematostella vectensis OX=45351 GN=v1g178888 PE=3 SV=1	THOP1; thimet oligopeptidase [EC:3.4.24.15]	Thimet oligopeptidase; Predicted protein
																A7RMA1	Predicted protein OS=Nematostella vectensis OX=45351 GN=v1g179696 PE=4 SV=1	HPGDS; prostaglandin-H2 D-isomerase / glutathione transferase [EC:5.3.99.2 2.5.1.18]	Prostaglandin-H2 D-isomerase / glutathione transferase; Predicted protein
																A7RQZ2	Predicted protein OS=Nematostella vectensis OX=45351 GN=v1g180953 PE=4 SV=1		Uncharacterized protein loc5518114; Predicted protein
																A7RRA1	Predicted protein OS=Nematostella vectensis OX=45351 GN=v1g181063 PE=3 SV=1	GABARAP, ATG8, LC3; GABA(A) receptor-associated protein	Gamma-aminobutyric acid receptor-associated protein-like 2; Predicted protein; Belongs to the ATG8 family
																A7RRV2	Predicted protein OS=Nematostella vectensis OX=45351 GN=v1g181274 PE=4 SV=1	RALA; Ras-related protein Ral-A	Ras-related protein ral-a; Predicted protein
																A7RT62	Predicted protein OS=Nematostella vectensis OX=45351 GN=v1g181611 PE=4 SV=1	RAB7A; Ras-related protein Rab-7A	Ras-related protein rab-7a; Predicted protein
																A7RXX6	Predicted protein OS=Nematostella vectensis OX=45351 GN=v1g183227 PE=3 SV=1	VAMP7; vesicle-associated membrane protein 7	Vesicle-associated membrane protein 7b isoform x1; Predicted protein; Belongs to the synaptobrevin family
																A7RZB8	Predicted protein OS=Nematostella vectensis OX=45351 GN=v1g183698 PE=3 SV=1	CKAP5; cytoskeleton-associated protein 5	Cytoskeleton-associated protein 5 isoform x1; Predicted protein
																A7S138	Predicted protein OS=Nematostella vectensis OX=45351 GN=v1g184356 PE=4 SV=1		Hydroxysteroid dehydrogenase-like protein 2; Predicted protein
																A7S382	Predicted protein OS=Nematostella vectensis OX=45351 GN=v1g185114 PE=3 SV=1	GRHPR; glyoxylate/hydroxypyruvate reductase [EC:1.1.1.79 1.1.1.81]	Glyoxylate reductase/hydroxypyruvate reductase; Predicted protein; Belongs to the D-isomer specific 2-hydroxyacid dehydrogenase family
																A7SEN0	Predicted protein OS=Nematostella vectensis OX=45351 GN=v1g188937 PE=3 SV=1	ACAA2; acetyl-CoA acyltransferase 2 [EC:2.3.1.16]	3-ketoacyl-CoA thiolase, mitochondrial; Predicted protein; Belongs to the thiolase family
																A7SKH6	Predicted protein OS=Nematostella vectensis OX=45351 GN=v1g190793 PE=3 SV=1	AP3M; AP-3 complex subunit mu	AP-3 complex subunit mu-1 isoform X1; Predicted protein; Belongs to the adaptor complexes medium subunit family
																A7SMW8	Predicted protein OS=Nematostella vectensis OX=45351 GN=v1g191466 PE=4 SV=1	RAB3C; Ras-related protein Rab-3C	Ras-related protein rab-3c; Predicted protein
																A7SR87	Predicted protein OS=Nematostella vectensis OX=45351 GN=v1g192646 PE=4 SV=1	HPGDS; prostaglandin-H2 D-isomerase / glutathione transferase [EC:5.3.99.2 2.5.1.18]	Prostaglandin-H2 D-isomerase / glutathione transferase; Predicted protein
																A7ST02	Predicted protein OS=Nematostella vectensis OX=45351 GN=v1g193205 PE=4 SV=1	RAB11A; Ras-related protein Rab-11A	Ras-related protein rab-11a; Predicted protein
																A7SUJ1	Predicted protein OS=Nematostella vectensis OX=45351 GN=v1g193684 PE=3 SV=1	RP-L11e, RPL11; large subunit ribosomal protein L11e	Large subunit ribosomal protein l11e; Predicted protein; Belongs to the universal ribosomal protein uL5 family
																A7T5A3	Predicted protein OS=Nematostella vectensis OX=45351 GN=v1g195800 PE=4 SV=1	HADHA; enoyl-CoA hydratase / long-chain 3-hydroxyacyl-CoA dehydrogenase [EC:4.2.1.17 1.1.1.211]	Enoyl-coa hydratase / long-chain 3-hydroxyacyl-coa dehydrogenase; Predicted protein
																A7RGA2	Predicted protein OS=Nematostella vectensis OX=45351 GN=v1g196762 PE=4 SV=1		Uncharacterized protein loc5521669 isoform x1; Predicted protein
																A7RGH4	Predicted protein OS=Nematostella vectensis OX=45351 GN=v1g196829 PE=3 SV=1	PSMC5, RPT6; 26S proteasome regulatory subunit T6	26S proteasome regulatory subunit T6; Predicted protein; Belongs to the AAA ATPase family
																A7RIH5	Predicted protein OS=Nematostella vectensis OX=45351 GN=v1g197607 PE=3 SV=1	GALK2; N-acetylgalactosamine kinase [EC:2.7.1.157]	N-acetylgalactosamine kinase isoform x1; Predicted protein
																A7RIT3	Predicted protein OS=Nematostella vectensis OX=45351 GN=v1g197744 PE=3 SV=1	KCNKN; potassium channel subfamily K, invertebrate	Potassium channel subfamily k, invertebrate; Predicted protein; Belongs to the two pore domain potassium channel (TC 1.A.1.8) family
																A7RJY0	Predicted protein OS=Nematostella vectensis OX=45351 GN=v1g198217 PE=4 SV=1		Serine protease hepsin; Predicted protein; Belongs to the peptidase S1 family
																A7RQC1	Predicted protein OS=Nematostella vectensis OX=45351 GN=v1g200530 PE=3 SV=1	HADH; 3-hydroxyacyl-CoA dehydrogenase [EC:1.1.1.35]	Hydroxyacyl-coenzyme a dehydrogenase, mitochondrial; Predicted protein
																A7RTT9	Predicted protein OS=Nematostella vectensis OX=45351 GN=v1g202054 PE=4 SV=1	ERI3, PINT1; ERI1 exoribonuclease 3 [EC:3.1.-.-]	Predicted protein
																A7S8D1	Predicted protein OS=Nematostella vectensis OX=45351 GN=v1g208361 PE=3 SV=1		Translocase of chloroplast 34, chloroplastic; Predicted protein
																A7S8Q7	Predicted protein OS=Nematostella vectensis OX=45351 GN=v1g208515 PE=4 SV=1		Uncharacterized protein ymr196w isoform x1; Predicted protein
																A7SF37	Predicted protein OS=Nematostella vectensis OX=45351 GN=v1g211304 PE=4 SV=1		Uncharacterized protein loc116616174; Predicted protein
																A7SFJ6	Predicted protein OS=Nematostella vectensis OX=45351 GN=v1g211503 PE=4 SV=1		Predicted protein
																A7SG03	Predicted protein OS=Nematostella vectensis OX=45351 GN=v1g211696 PE=4 SV=1	UPB1, pydC; beta-ureidopropionase [EC:3.5.1.6]	Beta-ureidopropionase; Predicted protein
																A7SLP0	Predicted protein OS=Nematostella vectensis OX=45351 GN=v1g214210 PE=4 SV=1	GLIPR2; glioma pathogenesis-related protein 2	Predicted protein; Belongs to the CRISP family
																A7SVC4	Predicted protein OS=Nematostella vectensis OX=45351 GN=v1g218041 PE=3 SV=1	ARL3; ADP-ribosylation factor-like protein 3	Adp-ribosylation factor-like protein 3; Predicted protein; Belongs to the small GTPase superfamily. Arf family
																A7SZS3	Predicted protein OS=Nematostella vectensis OX=45351 GN=v1g220085 PE=3 SV=1		Chondroitin sulfate abc exolyase; Predicted protein
																A7RI41	Predicted protein OS=Nematostella vectensis OX=45351 GN=v1g226223 PE=3 SV=1	RP-L37Ae, RPL37A; large subunit ribosomal protein L37Ae	Large subunit ribosomal protein l37ae; Predicted protein
																A7T224	Predicted protein OS=Nematostella vectensis OX=45351 GN=v1g231343 PE=3 SV=1	CYC1, CYT1, petC; ubiquinol-cytochrome c reductase cytochrome c1 subunit	Predicted protein
																A7SQQ7	Predicted protein OS=Nematostella vectensis OX=45351 GN=v1g233482 PE=3 SV=1	PSMD3, RPN3; 26S proteasome regulatory subunit N3	26S proteasome non-ATPase regulatory subunit 3; Predicted protein
																A7RTM1	Predicted protein OS=Nematostella vectensis OX=45351 GN=v1g234457 PE=4 SV=1	TOM70; mitochondrial import receptor subunit TOM70	Mitochondrial import receptor subunit tom70 isoform x1; Predicted protein
																A7RGT2	Predicted protein OS=Nematostella vectensis OX=45351 GN=v1g236320 PE=3 SV=1	RP-L26e, RPL26; large subunit ribosomal protein L26e	Large subunit ribosomal protein l26e; Predicted protein
																A7RHF5	Predicted protein OS=Nematostella vectensis OX=45351 GN=v1g236342 PE=4 SV=1	PEPD; Xaa-Pro dipeptidase [EC:3.4.13.9]	Xaa-pro dipeptidase; Predicted protein
																A7RYG0	Predicted protein OS=Nematostella vectensis OX=45351 GN=v1g236748 PE=4 SV=1	NCAM, CD56; neural cell adhesion molecule	Neural cell adhesion molecule 2 isoform x7; Predicted protein
																A7S0H8	Predicted protein OS=Nematostella vectensis OX=45351 GN=v1g236810 PE=3 SV=1	ARL1; ADP-ribosylation factor-like protein 1	Adp-ribosylation factor-like protein 1; Predicted protein; Belongs to the small GTPase superfamily. Arf family
																A7SA71	Predicted protein OS=Nematostella vectensis OX=45351 GN=v1g237062 PE=4 SV=1		Uncharacterized protein loc5511083; Predicted protein
																A7SNQ5	Predicted protein OS=Nematostella vectensis OX=45351 GN=v1g237392 PE=4 SV=1		Universal stress protein slr1101; Predicted protein
																A7SU78	Predicted protein OS=Nematostella vectensis OX=45351 GN=v1g237519 PE=3 SV=1	RP-L3e, RPL3; large subunit ribosomal protein L3e	Large subunit ribosomal protein l3e; Predicted protein; Belongs to the universal ribosomal protein uL3 family
																A7RET6	Predicted protein OS=Nematostella vectensis OX=45351 GN=v1g237717 PE=4 SV=1		Uncharacterized protein loc5522277 isoform x1; Predicted protein
																A7RG78	Predicted protein OS=Nematostella vectensis OX=45351 GN=v1g238031 PE=4 SV=1	EIF4B; translation initiation factor 4B	Eukaryotic translation initiation factor 4b isoform x1; Predicted protein
																A7RJX6	Predicted protein OS=Nematostella vectensis OX=45351 GN=v1g238833 PE=3 SV=1	LUC7L2; RNA-binding protein Luc7-like 2	Predicted protein
																A7RRW5	Predicted protein OS=Nematostella vectensis OX=45351 GN=v1g240263 PE=3 SV=1	CNTNAP2; contactin associated protein-like 2	Egf and laminin g domain-containing protein; Predicted protein
																A7RTY8	Predicted protein OS=Nematostella vectensis OX=45351 GN=v1g240667 PE=4 SV=1	SERBP1; plasminogen activator inhibitor 1 RNA-binding protein	Plasminogen activator inhibitor 1 rna-binding protein isoform x1; Predicted protein
																A7RUG6	Predicted protein OS=Nematostella vectensis OX=45351 GN=v1g240781 PE=3 SV=1	GGA; ADP-ribosylation factor-binding protein GGA	Adp-ribosylation factor-binding protein gga1; Predicted protein
																A7RUH6	Predicted protein OS=Nematostella vectensis OX=45351 GN=v1g240787 PE=4 SV=1	AIMP2; aminoacyl tRNA synthase complex-interacting multifunctional protein 2	Aminoacyl trna synthase complex-interacting multifunctional protein 2; Predicted protein
																A7RZ26	Predicted protein OS=Nematostella vectensis OX=45351 GN=v1g241689 PE=3 SV=1	DNAJA1; DnaJ homolog subfamily A member 1	Dnaj homolog subfamily a member 1; Predicted protein
																A7S041	Predicted protein OS=Nematostella vectensis OX=45351 GN=v1g241911 PE=3 SV=1	SF3B1, SAP155; splicing factor 3B subunit 1	Splicing factor 3b subunit 1 isoform x1; Predicted protein
																A7S0R9	Predicted protein OS=Nematostella vectensis OX=45351 GN=v1g242049 PE=3 SV=1	HPSE; heparanase [EC:3.2.1.166]	Predicted protein
																A7S6U9	Predicted protein OS=Nematostella vectensis OX=45351 GN=v1g243273 PE=4 SV=1	TNPO1, IPO2, KPNB2; transportin-1	Predicted protein
																A7S6X7	Predicted protein OS=Nematostella vectensis OX=45351 GN=v1g243279 PE=3 SV=1	SNW1, SKIIP, SKIP; SNW domain-containing protein 1	Snw domain-containing protein 1; Predicted protein
																A7SB97	Predicted protein OS=Nematostella vectensis OX=45351 GN=v1g244093 PE=4 SV=1		Uncharacterized protein loc5510662; Predicted protein
																A7SDA7	Predicted protein OS=Nematostella vectensis OX=45351 GN=v1g244471 PE=3 SV=1	PATL1, PAT1; DNA topoisomerase 2-associated protein PAT1	Dna topoisomerase 2-associated protein pat1; Predicted protein
																A7SGN4	Predicted protein OS=Nematostella vectensis OX=45351 GN=v1g245162 PE=4 SV=1	RP-S16e, RPS16; small subunit ribosomal protein S16e	Small subunit ribosomal protein s16e; Predicted protein
																A7SHP9	Predicted protein OS=Nematostella vectensis OX=45351 GN=v1g245344 PE=4 SV=1	TTLL12; tubulin--tyrosine ligase-like protein 12	Tubulin--tyrosine ligase-like protein 12; Predicted protein
																A7SHY5	Predicted protein OS=Nematostella vectensis OX=45351 GN=v1g245394 PE=3 SV=1	RP-L7e, RPL7; large subunit ribosomal protein L7e	Large subunit ribosomal protein l7e; Predicted protein
																A7SIT6	Predicted protein OS=Nematostella vectensis OX=45351 GN=v1g245536 PE=4 SV=1		Uncharacterized protein loc5507855; Predicted protein
																A7SIX1	Predicted protein OS=Nematostella vectensis OX=45351 GN=v1g245560 PE=3 SV=1	CWC15; protein CWC15	Spliceosome-associated protein cwc15 homolog; Predicted protein
																A7SJR7	Predicted protein OS=Nematostella vectensis OX=45351 GN=v1g245736 PE=3 SV=1		Uncharacterized protein loc5507467 isoform x1; Predicted protein
																A7STN4	Predicted protein OS=Nematostella vectensis OX=45351 GN=v1g247336 PE=3 SV=1	atuD; citronellyl-CoA dehydrogenase [EC:1.3.99.-]	Probable acyl-coa dehydrogenase 6; Predicted protein
																A7SYL2	Predicted protein OS=Nematostella vectensis OX=45351 GN=v1g248100 PE=4 SV=1	SPAG1; sperm-associated antigen 1	Rna polymerase ii-associated protein 3-like; Predicted protein
																A7RFC2	Predicted protein OS=Nematostella vectensis OX=45351 GN=v1g79423 PE=3 SV=1	AUB, PIWI; aubergine	Piwi-like protein 1; Predicted protein; Belongs to the argonaute family
																A7RJW7	Predicted protein OS=Nematostella vectensis OX=45351 GN=v1g83866 PE=3 SV=1	PRKAR; cAMP-dependent protein kinase regulator	Camp-dependent protein kinase type i-alpha regulatory subunit; Predicted protein
																A7RKM0	Predicted protein OS=Nematostella vectensis OX=45351 GN=v1g84810 PE=4 SV=1	CFAP52, WDR16; cilia- and flagella-associated protein 52	Cilia- and flagella-associated protein 52 isoform x1; Predicted protein
																A7RYJ9	Predicted protein OS=Nematostella vectensis OX=45351 GN=v1g97737 PE=3 SV=1	ARRB; beta-arrestin	Predicted protein
																A7RZ88	Predicted protein OS=Nematostella vectensis OX=45351 GN=v1g98476 PE=4 SV=1	GSN; gelsolin	Predicted protein
																A7RH72	Probable methylthioribulose-1-phosphate dehydratase OS=Nematostella vectensis OX=45351 GN=v1g197093 PE=3 SV=1
																A7SMV1	Programmed cell death protein 4 OS=Nematostella vectensis OX=45351 GN=v1g233387 PE=3 SV=1
																A7STM8	Protein disulfide-isomerase OS=Nematostella vectensis OX=45351 GN=v1g193399 PE=3 SV=1
																A7SSX5	PRP6 homolog OS=Nematostella vectensis OX=45351 GN=v1g130381 PE=4 SV=1
																A7RIZ1	Pyruvate carboxylase OS=Nematostella vectensis OX=45351 GN=v1g178585 PE=4 SV=1
																A7RER9	Pyruvate kinase OS=Nematostella vectensis OX=45351 GN=v1g157664 PE=3 SV=1
																A7T1P0	Ribosomal protein L19 OS=Nematostella vectensis OX=45351 GN=v1g248539 PE=3 SV=1
																A7SDI8	Ribosomal protein L37 OS=Nematostella vectensis OX=45351 GN=v1g244518 PE=3 SV=1
																A7RTJ5	RNA helicase OS=Nematostella vectensis OX=45351 GN=v1g236625 PE=3 SV=1
																A7RPJ2	RNA helicase OS=Nematostella vectensis OX=45351 GN=v1g89179 PE=4 SV=1
																A7S760	RuvB-like helicase OS=Nematostella vectensis OX=45351 GN=v1g186514 PE=3 SV=1
																A7RJB0	Serine/threonine protein phosphatase 2A regulatory subunit OS=Nematostella vectensis OX=45351 GN=v1g159439 PE=3 SV=1
																A7RIC2	Sidoreflexin OS=Nematostella vectensis OX=45351 GN=v1g238491 PE=3 SV=1
																A7RM92	Small nuclear ribonucleoprotein Sm D3 OS=Nematostella vectensis OX=45351 GN=v1g86522 PE=3 SV=1
																A7RP73	Sorting nexin OS=Nematostella vectensis OX=45351 GN=v1g161158 PE=3 SV=1
																A7RX31	Succinate--CoA ligase [GDP-forming] subunit beta, mitochondrial OS=Nematostella vectensis OX=45351 GN=v1g163681 PE=3 SV=1
																A7T288	T-complex protein 1 subunit delta OS=Nematostella vectensis OX=45351 GN=v1g176357 PE=3 SV=1
																A7SLL4	T-complex protein 1 subunit gamma OS=Nematostella vectensis OX=45351 GN=v1g237354 PE=3 SV=1
																A7RFK6	Tetratricopeptide repeat protein 38 OS=Nematostella vectensis OX=45351 GN=v1g157950 PE=3 SV=1
																A7SKB9	Trans-3-hydroxy-L-proline dehydratase OS=Nematostella vectensis OX=45351 GN=v1g230391 PE=3 SV=1
																A7SD96	Trifunctional purine biosynthetic protein adenosine-3 OS=Nematostella vectensis OX=45351 GN=v1g114087 PE=3 SV=1
																A7RUX0	Tubulin alpha chain OS=Nematostella vectensis OX=45351 GN=v1g234521 PE=3 SV=1
																A7S7S7	Tubulin-folding cofactor B OS=Nematostella vectensis OX=45351 GN=v1g186704 PE=3 SV=1
																A7SFZ8	Ubiquitin carboxyl-terminal hydrolase OS=Nematostella vectensis OX=45351 GN=v1g189407 PE=3 SV=1
																A7SJQ0	Uroporphyrinogen decarboxylase OS=Nematostella vectensis OX=45351 GN=v1g190553 PE=3 SV=1
																A7RIW3	UTP--glucose-1-phosphate uridylyltransferase OS=Nematostella vectensis OX=45351 GN=v1g178554 PE=3 SV=1
																A7S1B9	V-type proton ATPase subunit a OS=Nematostella vectensis OX=45351 GN=v1g234753 PE=3 SV=1
																A7RL79	V-type proton ATPase subunit C OS=Nematostella vectensis OX=45351 GN=v1g160000 PE=3 SV=1
																A7RG58	V-type proton ATPase subunit F OS=Nematostella vectensis OX=45351 GN=v1g226158 PE=3 SV=1
																A7SQT8	V-type proton ATPase subunit OS=Nematostella vectensis OX=45351 GN=v1g128006 PE=3 SV=1
																A7S4Q7	Xylose isomerase OS=Nematostella vectensis OX=45351 GN=v1g229384 PE=3 SV=1

## Sheet: Table S4_Prot__Kegg_Enrichment
Cluster	Category	Term	Count	%	PValue	Genes	List Total	Pop Hits	Pop Total	Fold Enrichment
1	KEGG_PATHWAY	nve00190:Oxidative phosphorylation	10	6.36943	2.38291e-06	A7RJL7, A7SX99, A7RRK0, A7SCJ3, A7S0D1, A7RI03, A7RZ03, A7SPP0, A7SD20, A7SK19	64	72	3714	8.0599
1	KEGG_PATHWAY	nve01200:Carbon metabolism	7	4.4586	0.00555341	A7RHJ6, A7RI62, A7SRY1, A7SCJ3, A7S6F3, A7RPB4, A7RT86	64	97	3714	4.18782
1	KEGG_PATHWAY	nve00910:Nitrogen metabolism	3	1.91083	0.00742513	A7S717, A7S6F3, A7S762	64	8	3714	21.7617
2	KEGG_PATHWAY	nve00250:Alanine, aspartate and glutamate metabolism	3	3	0.0159321	A7SPW2, A7RT61, A7SXV0	27	28	3714	14.7381
3	KEGG_PATHWAY	nve00280:Valine, leucine and isoleucine degradation	4	3.33333	0.00800076	A7RFT6, A7SF39, A7RVM2, A7SFM8	38	42	3714	9.30827
3	KEGG_PATHWAY	nve00640:Propanoate metabolism	3	2.5	0.0310288	A7RFT6, A7SF39, A7SLY9	38	28	3714	10.4718
3	KEGG_PATHWAY	nve01240:Biosynthesis of cofactors	5	4.16667	0.0325534	A7RWF3, A7RFT6, A7RVA9, A7SFM8, A7RG51	38	123	3714	3.97304
3	KEGG_PATHWAY	nve01100:Metabolic pathways	18	15	0.0329318	A7T0R9, A7SY95, A7RU24, A7RVM2, A7SCI4, A7RVA9, A7SFM8, A7T002, A7RT53, A7RWF3, A7RFT6, A7SEM3, A7SF39, A7S4Z2, A7SLY9, A7SNG6, A7SD62, A7RG51	38	1130	3714	1.55687
3	KEGG_PATHWAY	nve00190:Oxidative phosphorylation	4	3.33333	0.033902	A7SNY2, A7RU24, A7S4Z2, A7RT53	38	72	3714	5.42982
3	KEGG_PATHWAY	nve00020:Citrate cycle (TCA cycle)	3	2.5	0.0352674	A7RU24, A7RFT6, A7SLY9	38	30	3714	9.77368
3	KEGG_PATHWAY	nve00670:One carbon pool by folate	3	2.5	0.0492156	A7SY95, A7RFT6, A7RG51	38	36	3714	8.14474
4	KEGG_PATHWAY	nve01230:Biosynthesis of amino acids	6	5.76923	0.00045165	A7RYI9, A7SEP6, A7RZV8, A7RN43, A7RMR5, A7S2F7	39	65	3714	8.79053
4	KEGG_PATHWAY	nve00270:Cysteine and methionine metabolism	4	3.84615	0.00980461	A7RYI9, A7SEP6, A7RQE0, A7RMR5	39	44	3714	8.65734
4	KEGG_PATHWAY	nve04145:Phagosome	5	4.80769	0.0117523	A7SJX9, A7S1V0, A7T9Q8, A7SAS6, A7RRH9	39	88	3714	5.41084
4	KEGG_PATHWAY	nve00620:Pyruvate metabolism	3	2.88462	0.0417024	A7SRZ0, A7RL06, A7S2B4	39	32	3714	8.92788
4	KEGG_PATHWAY	nve01100:Metabolic pathways	18	17.3077	0.0431843	A7S0P8, A7SU04, A7RN43, A7RHR8, A7RMR5, A7SDH5, A7SFK7, A7RL06, A7RKY4, A7SRZ0, A7RYI9, A7SEP6, A7RZV8, A7RQE0, A7SA87, A7S2F7, A7SAS6, A7S2B4	39	1130	3714	1.51695
5	KEGG_PATHWAY	nve03010:Ribosome	33	12.3596	8.03927e-19	A7SU78, A7S4S4, A7S786, A7SUJ1, A7SGN4, A7SN77, A7SBD1, A7T1P0, A7SQP1, A7RUW3, A7SRV8, A7RL80, A7RI41, A7T0C1, A7S2J5, A7RLF6, A7RSF0, A7S3J7, A7REW3, A7RYT2, A7RJJ7, A7S5T9, A7RS93, A7RFJ1, A7S494, A7SDI8, A7RGT2, A7SAM6, A7S072, A7S3C2, A7SH82, A7SHY5	151	121	3714	6.70801
5	KEGG_PATHWAY	nve00280:Valine, leucine and isoleucine degradation	8	2.99625	0.00124985	A7SWC2, A7SLW1, A7SEN0, A7RGP1, A7RHX8, A7SJI9, A7SHB8, A7RQC1	151	42	3714	4.68496
5	KEGG_PATHWAY	nve01230:Biosynthesis of amino acids	8	2.99625	0.0148688	A7SLW1, A7SFV8, A7SF13, A7RU37, A7RER9, A7S2W5, A7S143, A7RIZ1	151	65	3714	3.0272
5	KEGG_PATHWAY	nve03050:Proteasome	6	2.24719	0.017196	A7SQQ7, A7T284, A7SYY2, A7SZN8, A7RGH4, A7SIL7	151	38	3714	3.88358
5	KEGG_PATHWAY	nve00190:Oxidative phosphorylation	8	2.99625	0.0249072	A7SQT8, A7RV43, A7S1B9, A7RG58, A7RNI6, A7RL79, A7SUW1, A7T224	151	72	3714	2.73289
5	KEGG_PATHWAY	nve01100:Metabolic pathways	58	21.7228	0.0261281	A7S4Q7, A7RG06, A7RIM3, A7SR35, A7S1S6, A7SEN0, A7S1B9, A7SBT1, A7SXK7, A7RX31, A7S0R9, A8DWA9, A7S338, A7SJI9, A7SPM9, A7RER9, A7RL79, A7SUW1, A7SR87, A7S773, A7T224, A7RQV8, A7SFU6, A7SQB8, A7SJQ0, A7RHX8, A7RG58, A7RMA1, A7RIZ1, A7SKB9, A7RH72, A7SQT8, A7RV43, A7RNI1, A7RNI6, A7S382, A7S2W5, A7S143, A7SJJ1, A7SWC2, A7SFR2, A7RIW3, A7SFV8, A7SF13, A7SYK1, A7SD96, A7RIH5, A7RU37, A7SY83, A7S6X6,…	151	1130	3714	1.26245
5	KEGG_PATHWAY	nve00270:Cysteine and methionine metabolism	6	2.24719	0.0306913	A7SLW1, A7SFV8, A7SQB8, A7S143, A7SJJ1, A7RH72	151	44	3714	3.354
5	KEGG_PATHWAY	nve01200:Carbon metabolism	9	3.37079	0.0406716	A7RX31, A7SFV8, A7SF13, A7RGP1, A7RU37, A7RER9, A7SYK1, A7RIZ1, A7SR35	151	97	3714	2.28211
	KEGG_PATHWAY	nve03010:Ribosome	10	13.1579	2.46867e-07	A7RLY2, A7SK96, A7RLM9, A7S405, A7SNU0, A7RKV4, A7SUQ5, A7SES9, A7SKY1, A7SCX9	31	121	3714	9.90136

## Sheet: Table S5_ADONIS and ANOSIM
Parameter	Metric	Andonis R²	Adonis p	Anosim R	Anosim p
Genotype	Bray-Curtis	0.512179	<0,001	0.813667	<0,001
	Jaccard	0.363325	<0,001	0.894556	<0,001
	Weighted Unifrac	0.589345	<0,001	0.835556	<0,001
	Unweighted Unifrac	0.42598	<0,001	0.814667	<0,001
